# Supplementary material for: Aquimarina sp. Associated With a Cuticular Disease of Cultured Larval Palinurid and Scyllarid Lobsters
Source: Front Microbiol. 2020 Oct 9;11:573588. doi: 10.3389/fmicb.2020.573588 (PMC7581904; doi:10.3389/fmicb.2020.573588)
Supplement: Supplementary file 1 [file Data_Sheet_1.xlsx]

## Sheet: supplementary table 1
Supplementary table 1. Annotated genes from a chromosome (contig 1) and a plasmid (contig 2) of Aquimarina sp. TRL1.
Feature ID	Type	Contig	Start	Stop	Frame	Strand	Length (bp)	Function	Subsystem
fig|6666666.563250.peg.1	CDS	1	1	1428	1	+	1428	Chromosomal replication initiator protein DnaA	DNA replication cluster 1
fig|6666666.563250.peg.2	CDS	1	1442	1897	2	+	456	Low molecular weight protein tyrosine phosphatase (EC 3.1.3.48)	LMPTP YfkJ cluster; <br>Protein deglycation
fig|6666666.563250.peg.3	CDS	1	2032	2763	1	+	732	Tetrapyrrole (Corrin-Porphyrin) methylase family protein	- none -
fig|6666666.563250.peg.4	CDS	1	3433	2792	-1	-	642	LysM domain protein	- none -
fig|6666666.563250.peg.5	CDS	1	4808	3765	-2	-	1044	Murein endolytic transglycosylase MltG	- none -
fig|6666666.563250.peg.6	CDS	1	5329	4799	-1	-	531	Acetyltransferase	- none -
fig|6666666.563250.peg.7	CDS	1	6108	5323	-3	-	786	Diaminopimelate epimerase (EC 5.1.1.7)	CBSS-84588.1.peg.1247; <br>Lysine Biosynthesis DAP Pathway; <br>Lysine Biosynthesis DAP Pathway, GJO scratch
fig|6666666.563250.peg.8	CDS	1	6390	7808	3	+	1419	Serine protease	- none -
fig|6666666.563250.peg.9	CDS	1	7952	9400	2	+	1449	NAD-dependent glyceraldehyde-3-phosphate dehydrogenase (EC 1.2.1.12)	Pyridoxin (Vitamin B6) Biosynthesis
fig|6666666.563250.peg.10	CDS	1	9636	10250	3	+	615	hypothetical protein	- none -
fig|6666666.563250.peg.11	CDS	1	10317	11000	3	+	684	tRNA (guanine(37)-N(1))-methyltransferase (EC 2.1.1.228)	- none -
fig|6666666.563250.peg.12	CDS	1	11117	11467	2	+	351	LSU ribosomal protein L19p	- none -
fig|6666666.563250.peg.13	CDS	1	11855	11986	2	+	132	hypothetical protein	- none -
fig|6666666.563250.peg.14	CDS	1	12718	14943	1	+	2226	Isocitrate dehydrogenase [NADP] (EC 1.1.1.42); Monomeric isocitrate dehydrogenase [NADP] (EC 1.1.1.42)	5-FCL-like protein
fig|6666666.563250.peg.15	CDS	1	15067	14948	-1	-	120	hypothetical protein	- none -
fig|6666666.563250.peg.16	CDS	1	15089	15631	2	+	543	RNA polymerase ECF-type sigma factor	- none -
fig|6666666.563250.peg.17	CDS	1	15628	16176	1	+	549	hypothetical protein	- none -
fig|6666666.563250.peg.18	CDS	1	16205	17242	2	+	1038	hypothetical protein	- none -
fig|6666666.563250.peg.19	CDS	1	17290	17970	1	+	681	hypothetical protein	- none -
fig|6666666.563250.peg.20	CDS	1	17960	18106	2	+	147	hypothetical protein	- none -
fig|6666666.563250.peg.21	CDS	1	18119	19312	2	+	1194	Beta-lactamase class C-like and penicillin binding proteins (PBPs) superfamily	- none -
fig|6666666.563250.peg.22	CDS	1	19409	21796	2	+	2388	TonB-dependent receptor	Ton and Tol transport systems
fig|6666666.563250.peg.23	CDS	1	21801	22613	3	+	813	hypothetical protein	- none -
fig|6666666.563250.peg.24	CDS	1	22682	23506	2	+	825	N-acetylmuramic acid 6-phosphate etherase (EC 4.2.1.126)	- none -
fig|6666666.563250.peg.25	CDS	1	24255	23746	-3	-	510	hypothetical protein	- none -
fig|6666666.563250.peg.26	CDS	1	24527	25351	2	+	825	hypothetical protein	- none -
fig|6666666.563250.peg.27	CDS	1	25505	26704	2	+	1200	DNA polymerase IV (EC 2.7.7.7)	DNA repair, bacterial
fig|6666666.563250.peg.28	CDS	1	26717	29692	2	+	2976	Error-prone repair homolog of DNA polymerase III alpha subunit (EC 2.7.7.7)	DNA replication strays
fig|6666666.563250.peg.29	CDS	1	31296	29689	-3	-	1608	Polymyxin resistance protein ArnT, undecaprenyl phosphate-alpha-L-Ara4N transferase; Melittin resistance protein PqaB	Lipid A-Ara4N pathway ( Polymyxin resistance )
fig|6666666.563250.peg.30	CDS	1	31982	31314	-2	-	669	hypothetical protein	- none -
fig|6666666.563250.peg.31	CDS	1	32580	32978	3	+	399	Cell wall-associated hydrolase	- none -
fig|6666666.563250.peg.32	CDS	1	37770	37925	3	+	156	hypothetical protein	- none -
fig|6666666.563250.peg.33	CDS	1	38676	39074	3	+	399	Cell wall-associated hydrolase	- none -
fig|6666666.563250.peg.34	CDS	1	43865	44056	2	+	192	hypothetical protein	- none -
fig|6666666.563250.peg.35	CDS	1	44172	46118	3	+	1947	Threonyl-tRNA synthetase (EC 6.1.1.3)	tRNA aminoacylation, Thr
fig|6666666.563250.peg.36	CDS	1	46370	46708	2	+	339	Translation initiation factor 3	Mycobacterium virulence operon involved in protein synthesis (LSU ribosomal proteins); <br>Translation initiation factors bacterial
fig|6666666.563250.peg.37	CDS	1	46780	46977	1	+	198	LSU ribosomal protein L35p	Mycobacterium virulence operon involved in protein synthesis (LSU ribosomal proteins)
fig|6666666.563250.peg.38	CDS	1	47093	47437	2	+	345	LSU ribosomal protein L20p	Mycobacterium virulence operon involved in protein synthesis (LSU ribosomal proteins)
fig|6666666.563250.peg.39	CDS	1	47611	48021	1	+	411	hypothetical protein	- none -
fig|6666666.563250.peg.40	CDS	1	48029	50800	2	+	2772	hypothetical protein	- none -
fig|6666666.563250.peg.41	CDS	1	50844	51653	3	+	810	RNA methyltransferase DR1017	- none -
fig|6666666.563250.peg.42	CDS	1	51714	52946	3	+	1233	Peptidase, M48 family	- none -
fig|6666666.563250.peg.43	CDS	1	53106	55310	3	+	2205	Guanosine-3&#39;,5&#39;-bis(diphosphate) 3&#39;-pyrophosphohydrolase (EC 3.1.7.2) / GTP pyrophosphokinase (EC 2.7.6.5), (p)ppGpp synthetase II	CBSS-176299.4.peg.1292; <br>CBSS-176299.4.peg.1292; <br>Stringent Response, (p)ppGpp metabolism; <br>Stringent Response, (p)ppGpp metabolism
fig|6666666.563250.peg.44	CDS	1	55342	55809	1	+	468	Ferric uptake regulation protein FUR	Oxidative stress
fig|6666666.563250.peg.45	CDS	1	55809	57080	3	+	1272	Adenylosuccinate synthetase (EC 6.3.4.4)	Purine conversions
fig|6666666.563250.peg.46	CDS	1	58059	57163	-3	-	897	hypothetical protein	- none -
fig|6666666.563250.peg.47	CDS	1	58562	58056	-2	-	507	hypothetical protein	- none -
fig|6666666.563250.peg.48	CDS	1	58839	60575	3	+	1737	Lipopolysaccharide export system protein LptA	- none -
fig|6666666.563250.peg.49	CDS	1	60623	61813	2	+	1191	Acetylornithine aminotransferase (EC 2.6.1.11) (ACOAT)	- none -
fig|6666666.563250.peg.50	CDS	1	62055	63443	3	+	1389	TPR domain protein	- none -
fig|6666666.563250.peg.51	CDS	1	63695	64660	2	+	966	Integral membrane protein	- none -
fig|6666666.563250.peg.52	CDS	1	64670	65698	2	+	1029	FIG028593: membrane protein	- none -
fig|6666666.563250.peg.53	CDS	1	65695	66423	1	+	729	Shikimate 5-dehydrogenase I alpha (EC 1.1.1.25)	Common Pathway For Synthesis of Aromatic Compounds (DAHP synthase to chorismate)
fig|6666666.563250.peg.54	CDS	1	66567	68555	3	+	1989	hypothetical protein	- none -
fig|6666666.563250.peg.55	CDS	1	68562	69194	3	+	633	Putative methyltransferase associated with DUF414	- none -
fig|6666666.563250.peg.56	CDS	1	70817	69378	-2	-	1440	hypothetical protein	- none -
fig|6666666.563250.peg.57	CDS	1	73994	70836	-2	-	3159	Outer membrane TonB-dependent transporter, utilization system for glycans and polysaccharides (PUL), SusC family	- none -
fig|6666666.563250.peg.58	CDS	1	75975	74452	-3	-	1524	Transcriptional regulator, AraC family	- none -
fig|6666666.563250.peg.59	CDS	1	76352	76882	2	+	531	Acetyltransferase, GNAT family	- none -
fig|6666666.563250.peg.60	CDS	1	76922	77440	2	+	519	hypothetical protein	- none -
fig|6666666.563250.peg.61	CDS	1	77437	77916	1	+	480	hypothetical protein	- none -
fig|6666666.563250.peg.62	CDS	1	80997	77974	-3	-	3024	hypothetical protein	- none -
fig|6666666.563250.peg.63	CDS	1	81976	81203	-1	-	774	Nucleoside triphosphate pyrophosphohydrolase MazG (EC 3.6.1.8)	Nucleoside triphosphate pyrophosphohydrolase MazG
fig|6666666.563250.peg.64	CDS	1	82936	81992	-1	-	945	putative oxidoreductase, nitronate monooxygenase family	- none -
fig|6666666.563250.peg.65	CDS	1	84169	82982	-1	-	1188	tRNA-specific 2-thiouridylase MnmA (EC 2.8.1.13)	- none -
fig|6666666.563250.peg.66	CDS	1	84982	84296	-1	-	687	hypothetical protein	- none -
fig|6666666.563250.peg.67	CDS	1	87048	85159	-3	-	1890	Inner membrane protein translocase and chaperone YidC, long form	- none -
fig|6666666.563250.peg.68	CDS	1	88778	87162	-2	-	1617	CTP synthase (EC 6.3.4.2)	pyrimidine conversions
fig|6666666.563250.peg.69	CDS	1	89397	88957	-3	-	441	hypothetical protein	- none -
fig|6666666.563250.peg.70	CDS	1	90059	89469	-2	-	591	Peptide deformylase (EC 3.5.1.88)	Translation termination factors bacterial
fig|6666666.563250.peg.71	CDS	1	90507	90094	-3	-	414	Putative pre-16S rRNA nuclease YqgF	- none -
fig|6666666.563250.peg.72	CDS	1	90631	91446	1	+	816	2,3,4,5-tetrahydropyridine-2,6-dicarboxylate N-succinyltransferase (EC 2.3.1.117)	Lysine Biosynthesis DAP Pathway; <br>Lysine Biosynthesis DAP Pathway, GJO scratch
fig|6666666.563250.peg.73	CDS	1	91605	93449	3	+	1845	hypothetical protein	- none -
fig|6666666.563250.peg.74	CDS	1	94239	93460	-3	-	780	hypothetical protein	- none -
fig|6666666.563250.peg.75	CDS	1	94521	95474	3	+	954	Glycosyl transferase, family 2	- none -
fig|6666666.563250.peg.76	CDS	1	95479	96579	1	+	1101	hypothetical protein	- none -
fig|6666666.563250.peg.77	CDS	1	96824	97393	2	+	570	Threonylcarbamoyl-AMP synthase (EC 2.7.7.87)	- none -
fig|6666666.563250.peg.78	CDS	1	97452	98891	3	+	1440	CCA tRNA nucleotidyltransferase (EC 2.7.7.72)	- none -
fig|6666666.563250.peg.79	CDS	1	99097	100116	1	+	1020	Heme A synthase, cytochrome oxidase biogenesis protein Cox15-CtaA	Biogenesis of cytochrome c oxidases
fig|6666666.563250.peg.80	CDS	1	100203	100715	3	+	513	hypothetical protein	- none -
fig|6666666.563250.peg.81	CDS	1	100876	101934	1	+	1059	Lmo0572 protein	- none -
fig|6666666.563250.peg.82	CDS	1	102072	102854	3	+	783	hypothetical protein	- none -
fig|6666666.563250.peg.83	CDS	1	104101	103034	-1	-	1068	FIG00649718: hypothetical protein	- none -
fig|6666666.563250.peg.84	CDS	1	104301	105200	3	+	900	Efflux ABC transporter, ATP-binding protein	- none -
fig|6666666.563250.peg.85	CDS	1	105208	106053	1	+	846	hypothetical protein	- none -
fig|6666666.563250.peg.86	CDS	1	106359	106237	-3	-	123	hypothetical protein	- none -
fig|6666666.563250.peg.87	CDS	1	106388	108865	2	+	2478	hypothetical protein	- none -
fig|6666666.563250.peg.88	CDS	1	109019	111025	2	+	2007	Excinuclease ABC subunit B	DNA repair, UvrABC system
fig|6666666.563250.peg.89	CDS	1	111331	113664	1	+	2334	hypothetical protein	- none -
fig|6666666.563250.peg.90	CDS	1	113654	114910	2	+	1257	hypothetical protein	- none -
fig|6666666.563250.peg.91	CDS	1	115024	115440	1	+	417	hypothetical protein	- none -
fig|6666666.563250.peg.92	CDS	1	115597	116091	1	+	495	hypothetical protein	- none -
fig|6666666.563250.peg.93	CDS	1	117084	116131	-3	-	954	Transcriptional regulator, MarR family	- none -
fig|6666666.563250.peg.94	CDS	1	117613	117209	-1	-	405	conserved hypothetical rhodanese-domain protein	- none -
fig|6666666.563250.peg.95	CDS	1	117985	117671	-1	-	315	Protein containing rhodanese-like domain	- none -
fig|6666666.563250.peg.96	CDS	1	118698	118072	-3	-	627	Alkyl hydroperoxide reductase and/or thiol-specific antioxidant family (AhpC/TSA) protein	- none -
fig|6666666.563250.peg.97	CDS	1	119275	118754	-1	-	522	hypothetical protein	- none -
fig|6666666.563250.peg.98	CDS	1	119540	120022	2	+	483	Transcriptional regulator, MarR family	- none -
fig|6666666.563250.peg.99	CDS	1	120052	120618	1	+	567	Rhodanese-like domain protein	- none -
fig|6666666.563250.peg.100	CDS	1	120890	122284	2	+	1395	Anthranilate synthase, aminase component (EC 4.1.3.27)	Chorismate: Intermediate for synthesis of Tryptophan, PAPA antibiotics, PABA, 3-hydroxyanthranilate and more.; <br>Tryptophan synthesis
fig|6666666.563250.peg.101	CDS	1	122320	122889	1	+	570	Anthranilate synthase, amidotransferase component (EC 4.1.3.27) @ Para-aminobenzoate synthase, amidotransferase component (EC 2.6.1.85)	Chorismate: Intermediate for synthesis of Tryptophan, PAPA antibiotics, PABA, 3-hydroxyanthranilate and more.; <br>Chorismate: Intermediate for synthesis of Tryptophan, PAPA antibiotics, PABA, 3-hydroxyanthranilate and more.; <br>Folate Biosynthesis; <br>Tryptophan synthesis; <br>Tryptophan synthesis
fig|6666666.563250.peg.102	CDS	1	123025	124026	1	+	1002	Anthranilate phosphoribosyltransferase (EC 2.4.2.18)	Auxin biosynthesis; <br>Chorismate: Intermediate for synthesis of Tryptophan, PAPA antibiotics, PABA, 3-hydroxyanthranilate and more.; <br>Tryptophan synthesis
fig|6666666.563250.peg.103	CDS	1	124037	124822	2	+	786	Indole-3-glycerol phosphate synthase (EC 4.1.1.48)	Chorismate: Intermediate for synthesis of Tryptophan, PAPA antibiotics, PABA, 3-hydroxyanthranilate and more.; <br>Tryptophan synthesis
fig|6666666.563250.peg.104	CDS	1	124819	125481	1	+	663	Phosphoribosylanthranilate isomerase (EC 5.3.1.24)	Auxin biosynthesis; <br>Chorismate: Intermediate for synthesis of Tryptophan, PAPA antibiotics, PABA, 3-hydroxyanthranilate and more.; <br>Pterin synthesis related cluster; <br>Tryptophan synthesis
fig|6666666.563250.peg.105	CDS	1	125492	126676	2	+	1185	Tryptophan synthase beta chain (EC 4.2.1.20)	Auxin biosynthesis; <br>Chorismate: Intermediate for synthesis of Tryptophan, PAPA antibiotics, PABA, 3-hydroxyanthranilate and more.; <br>Tryptophan synthesis
fig|6666666.563250.peg.106	CDS	1	126717	127496	3	+	780	Tryptophan synthase alpha chain (EC 4.2.1.20)	Auxin biosynthesis; <br>Chorismate: Intermediate for synthesis of Tryptophan, PAPA antibiotics, PABA, 3-hydroxyanthranilate and more.; <br>Tryptophan synthesis
fig|6666666.563250.peg.107	CDS	1	127841	128554	2	+	714	hypothetical protein	- none -
fig|6666666.563250.peg.108	CDS	1	128556	129371	3	+	816	Transcriptional regulator, AraC family	- none -
fig|6666666.563250.peg.109	CDS	1	129446	129820	2	+	375	Glyoxalase family protein	- none -
fig|6666666.563250.peg.110	CDS	1	132453	129949	-3	-	2505	hypothetical protein	- none -
fig|6666666.563250.peg.111	CDS	1	133197	132493	-3	-	705	hypothetical protein	- none -
fig|6666666.563250.peg.112	CDS	1	133826	133323	-2	-	504	hypothetical protein	- none -
fig|6666666.563250.peg.113	CDS	1	134793	134116	-3	-	678	G:T/U mismatch-specific uracil/thymine DNA-glycosylase (EC 3.2.2.27)	- none -
fig|6666666.563250.peg.114	CDS	1	136668	135007	-3	-	1662	Probable poly(beta-D-mannuronate) O-acetylase (EC 2.3.1.-)	- none -
fig|6666666.563250.peg.115	CDS	1	137917	136661	-1	-	1257	hypothetical protein	- none -
fig|6666666.563250.peg.116	CDS	1	139528	138008	-1	-	1521	hypothetical protein	- none -
fig|6666666.563250.peg.117	CDS	1	143143	139691	-1	-	3453	Pyruvate carboxylase (EC 6.4.1.1)	- none -
fig|6666666.563250.peg.118	CDS	1	143725	144414	1	+	690	hypothetical protein	- none -
fig|6666666.563250.peg.119	CDS	1	144445	145563	1	+	1119	Transcriptional regulator, AraC family	- none -
fig|6666666.563250.peg.120	CDS	1	145553	146620	2	+	1068	hypothetical protein	- none -
fig|6666666.563250.peg.121	CDS	1	147510	146986	-3	-	525	hypothetical protein	- none -
fig|6666666.563250.peg.122	CDS	1	148937	147972	-2	-	966	hypothetical protein	- none -
fig|6666666.563250.peg.123	CDS	1	149859	148930	-3	-	930	hypothetical protein	- none -
fig|6666666.563250.peg.124	CDS	1	151011	150469	-3	-	543	hypothetical protein	- none -
fig|6666666.563250.peg.125	CDS	1	151666	151142	-1	-	525	hypothetical protein	- none -
fig|6666666.563250.peg.126	CDS	1	152937	151804	-3	-	1134	TRAP transporter solute receptor, unknown substrate 6	TRAP Transporter unknown substrate 6
fig|6666666.563250.peg.127	CDS	1	154334	152988	-2	-	1347	TRAP dicarboxylate transporter, DctM subunit, unknown substrate 6	TRAP Transporter unknown substrate 6
fig|6666666.563250.peg.128	CDS	1	154933	154406	-1	-	528	TRAP dicarboxylate transporter, DctQ subunit, unknown substrate 6	TRAP Transporter unknown substrate 6
fig|6666666.563250.peg.129	CDS	1	156343	155582	-1	-	762	UPF0246 protein YaaA	- none -
fig|6666666.563250.peg.130	CDS	1	157427	156738	-2	-	690	Nitroreductase family protein	- none -
fig|6666666.563250.peg.131	CDS	1	157785	157594	-3	-	192	Cold shock protein of CSP family	- none -
fig|6666666.563250.peg.132	CDS	1	158980	157943	-1	-	1038	LSU rRNA pseudouridine(1911/1915/1917) synthase (EC 5.4.99.23)	- none -
fig|6666666.563250.peg.133	CDS	1	159581	159006	-2	-	576	FIG00651985: hypothetical protein	- none -
fig|6666666.563250.peg.134	CDS	1	159765	160736	3	+	972	D-alanine--D-alanine ligase (EC 6.3.2.4)	- none -
fig|6666666.563250.peg.135	CDS	1	160796	161251	2	+	456	Phosphopantetheine adenylyltransferase (EC 2.7.7.3)	CBSS-266117.6.peg.1260; <br>CBSS-269801.1.peg.1715; <br>Coenzyme A Biosynthesis
fig|6666666.563250.peg.136	CDS	1	161383	162204	1	+	822	Possible Adenosine-deaminase (Editase) domain	- none -
fig|6666666.563250.peg.137	CDS	1	162623	163897	2	+	1275	hypothetical protein	- none -
fig|6666666.563250.peg.138	CDS	1	164185	163982	-1	-	204	FIG00652412: hypothetical protein	- none -
fig|6666666.563250.peg.139	CDS	1	165576	164182	-3	-	1395	MoaA/NifB/PqqE family radical SAM protein MJ0619	- none -
fig|6666666.563250.peg.140	CDS	1	166306	165566	-1	-	741	Prolipoprotein diacylglyceryl transferase	- none -
fig|6666666.563250.peg.141	CDS	1	168203	166335	-2	-	1869	Sulfate permease	Cysteine Biosynthesis
fig|6666666.563250.peg.142	CDS	1	168501	170261	3	+	1761	Gll2474 protein	- none -
fig|6666666.563250.peg.143	CDS	1	170849	170253	-2	-	597	NUDIX hydrolase-like protein CHU_2668	- none -
fig|6666666.563250.peg.144	CDS	1	170857	171510	1	+	654	Orotate phosphoribosyltransferase (EC 2.4.2.10)	- none -
fig|6666666.563250.peg.145	CDS	1	171511	171903	1	+	393	hypothetical protein	- none -
fig|6666666.563250.peg.146	CDS	1	172635	171904	-3	-	732	Biotin--protein ligase (EC 6.3.4.9)(EC 6.3.4.10)(EC 6.3.4.11)(EC 6.3.4.15)	- none -
fig|6666666.563250.peg.147	CDS	1	172727	173098	2	+	372	Ribosomal silencing factor RsfA	- none -
fig|6666666.563250.peg.148	CDS	1	173117	175069	2	+	1953	Cell division-associated, ATP-dependent zinc metalloprotease FtsH	- none -
fig|6666666.563250.peg.149	CDS	1	175188	175799	3	+	612	hypothetical protein	- none -
fig|6666666.563250.peg.150	CDS	1	176203	176604	1	+	402	Phosphatidate cytidylyltransferase (EC 2.7.7.41)	- none -
fig|6666666.563250.peg.151	CDS	1	176594	177241	2	+	648	Phosphatidylserine decarboxylase (EC 4.1.1.65)	- none -
fig|6666666.563250.peg.152	CDS	1	177247	177522	1	+	276	hypothetical protein	- none -
fig|6666666.563250.peg.153	CDS	1	180518	177885	-2	-	2634	Valyl-tRNA synthetase (EC 6.1.1.9)	tRNA aminoacylation, Val
fig|6666666.563250.peg.154	CDS	1	180645	181025	3	+	381	hypothetical protein	- none -
fig|6666666.563250.peg.155	CDS	1	182477	181113	-2	-	1365	hypothetical protein	- none -
fig|6666666.563250.peg.156	CDS	1	182587	183813	1	+	1227	Alanine transaminase (EC 2.6.1.2)	- none -
fig|6666666.563250.peg.157	CDS	1	183776	184783	2	+	1008	UDP-N-acetylenolpyruvoylglucosamine reductase (EC 1.3.1.98)	- none -
fig|6666666.563250.peg.158	CDS	1	184900	185106	1	+	207	Uncharacterized protein Celly_0586	- none -
fig|6666666.563250.peg.159	CDS	1	185138	185707	2	+	570	RNA polymerase ECF-type sigma factor	- none -
fig|6666666.563250.peg.160	CDS	1	185900	186772	2	+	873	Lipoyl synthase (EC 2.8.1.8)	- none -
fig|6666666.563250.peg.161	CDS	1	186807	187811	3	+	1005	NAD-dependent glyceraldehyde-3-phosphate dehydrogenase (EC 1.2.1.12)	Pyridoxin (Vitamin B6) Biosynthesis
fig|6666666.563250.peg.162	CDS	1	187840	190056	1	+	2217	Histidine kinase	- none -
fig|6666666.563250.peg.163	CDS	1	191172	190162	-3	-	1011	Tetraacyldisaccharide 4&#39;-kinase (EC 2.7.1.130)	- none -
fig|6666666.563250.peg.164	CDS	1	191327	192421	2	+	1095	GTP cyclohydrolase 1 type 2 homolog YbgI	- none -
fig|6666666.563250.peg.165	CDS	1	192425	193201	2	+	777	FIG137478: Hypothetical protein	- none -
fig|6666666.563250.peg.166	CDS	1	193434	194672	3	+	1239	hypothetical protein	- none -
fig|6666666.563250.peg.167	CDS	1	195182	194667	-2	-	516	Transcriptional regulator, MarR family	- none -
fig|6666666.563250.peg.168	CDS	1	195302	196384	2	+	1083	hypothetical protein	- none -
fig|6666666.563250.peg.169	CDS	1	196381	197373	1	+	993	Ornithine cyclodeaminase (EC 4.3.1.12)	Arginine and Ornithine Degradation
fig|6666666.563250.peg.170	CDS	1	197850	197383	-3	-	468	hypothetical protein	- none -
fig|6666666.563250.peg.171	CDS	1	198293	198045	-2	-	249	SSU ribosomal protein S20p	Ribosome SSU bacterial
fig|6666666.563250.peg.172	CDS	1	200104	198626	-1	-	1479	Prolyl-tRNA synthetase (EC 6.1.1.15), archaeal/eukaryal type	tRNA aminoacylation, Pro
fig|6666666.563250.peg.173	CDS	1	200204	201244	2	+	1041	hypothetical protein	- none -
fig|6666666.563250.peg.174	CDS	1	201387	202895	3	+	1509	putative hemin receptor	- none -
fig|6666666.563250.peg.175	CDS	1	204375	202960	-3	-	1416	hypothetical protein	- none -
fig|6666666.563250.peg.176	CDS	1	204828	205505	3	+	678	GTP cyclohydrolase I (EC 3.5.4.16) type 1	Folate Biosynthesis; <br>Folate biosynthesis cluster; <br>Pterin metabolism; <br>Pterin synthesis related cluster
fig|6666666.563250.peg.177	CDS	1	205548	207044	3	+	1497	Cysteinyl-tRNA synthetase (EC 6.1.1.16)	tRNA aminoacylation, Cys
fig|6666666.563250.peg.178	CDS	1	207053	207319	2	+	267	Membrane protein insertion efficiency factor YidD	- none -
fig|6666666.563250.peg.179	CDS	1	207388	208311	1	+	924	Prolipoprotein diacylglyceryl transferase	- none -
fig|6666666.563250.peg.180	CDS	1	209758	208682	-1	-	1077	Peptide chain release factor 1	Translation termination factors bacterial
fig|6666666.563250.peg.181	CDS	1	210934	210035	-1	-	900	hypothetical protein	- none -
fig|6666666.563250.peg.182	CDS	1	211974	211111	-3	-	864	hypothetical protein	- none -
fig|6666666.563250.peg.183	CDS	1	212184	212408	3	+	225	hypothetical protein	- none -
fig|6666666.563250.peg.184	CDS	1	212442	213992	3	+	1551	hypothetical protein	- none -
fig|6666666.563250.peg.185	CDS	1	214327	214160	-1	-	168	hypothetical protein	- none -
fig|6666666.563250.peg.186	CDS	1	214472	214618	2	+	147	hypothetical protein	- none -
fig|6666666.563250.peg.187	CDS	1	215340	215101	-3	-	240	hypothetical protein	- none -
fig|6666666.563250.peg.188	CDS	1	219969	215344	-3	-	4626	hypothetical protein	- none -
fig|6666666.563250.peg.189	CDS	1	224956	219962	-1	-	4995	hypothetical protein	- none -
fig|6666666.563250.peg.190	CDS	1	225664	225050	-1	-	615	hypothetical protein	- none -
fig|6666666.563250.peg.191	CDS	1	226209	225667	-3	-	543	Outer membrane protein H precursor	Periplasmic Stress Response
fig|6666666.563250.peg.192	CDS	1	226924	226448	-1	-	477	hypothetical protein	- none -
fig|6666666.563250.peg.193	CDS	1	228161	226950	-2	-	1212	hypothetical protein	- none -
fig|6666666.563250.peg.194	CDS	1	230380	228161	-1	-	2220	Type IV pilus biogenesis protein PilQ	- none -
fig|6666666.563250.peg.195	CDS	1	231914	230493	-2	-	1422	Type IV fimbrial assembly, ATPase PilB	- none -
fig|6666666.563250.peg.196	CDS	1	232387	231911	-1	-	477	hypothetical protein	- none -
fig|6666666.563250.peg.197	CDS	1	232954	232391	-1	-	564	Type IV pilin PilA	- none -
fig|6666666.563250.peg.198	CDS	1	234124	232994	-1	-	1131	Type IV fimbrial assembly protein PilC	- none -
fig|6666666.563250.peg.199	CDS	1	234596	234114	-2	-	483	hypothetical protein	- none -
fig|6666666.563250.peg.200	CDS	1	234907	234593	-1	-	315	hypothetical protein	- none -
fig|6666666.563250.peg.201	CDS	1	236139	234895	-3	-	1245	hypothetical protein	- none -
fig|6666666.563250.peg.202	CDS	1	236647	236177	-1	-	471	hypothetical protein	- none -
fig|6666666.563250.peg.203	CDS	1	237588	236656	-3	-	933	hypothetical protein	- none -
fig|6666666.563250.peg.204	CDS	1	238330	237596	-1	-	735	hypothetical protein	- none -
fig|6666666.563250.peg.205	CDS	1	239609	238614	-2	-	996	hypothetical protein	- none -
fig|6666666.563250.peg.206	CDS	1	239691	239816	3	+	126	hypothetical protein	- none -
fig|6666666.563250.peg.207	CDS	1	242305	239885	-1	-	2421	hypothetical protein	- none -
fig|6666666.563250.peg.208	CDS	1	243944	242469	-2	-	1476	hypothetical protein	- none -
fig|6666666.563250.peg.209	CDS	1	245139	243961	-3	-	1179	Phosphoribosylformylglycinamidine cyclo-ligase (EC 6.3.3.1)	De Novo Purine Biosynthesis
fig|6666666.563250.peg.210	CDS	1	246743	245235	-2	-	1509	hypothetical protein	- none -
fig|6666666.563250.peg.211	CDS	1	248222	246792	-2	-	1431	Curli production assembly/transport component CsgG	- none -
fig|6666666.563250.peg.212	CDS	1	248633	248229	-2	-	405	Curli production assembly/transport component CsgF	- none -
fig|6666666.563250.peg.213	CDS	1	249469	248741	-1	-	729	hypothetical protein	- none -
fig|6666666.563250.peg.214	CDS	1	249973	249482	-1	-	492	hypothetical protein	- none -
fig|6666666.563250.peg.215	CDS	1	251327	250149	-2	-	1179	hypothetical protein	- none -
fig|6666666.563250.peg.216	CDS	1	253854	251668	-3	-	2187	Glutamine synthetase type III, GlnN (EC 6.3.1.2)	Ammonia assimilation; <br>Glutamine, Glutamate, Aspartate and Asparagine Biosynthesis; <br>Glutamine synthetases
fig|6666666.563250.peg.217	CDS	1	255216	254260	-3	-	957	Sodium/calcium exchanger	- none -
fig|6666666.563250.peg.218	CDS	1	256263	255400	-3	-	864	Milk-clotting protease	- none -
fig|6666666.563250.peg.219	CDS	1	256449	258338	3	+	1890	hypothetical protein	- none -
fig|6666666.563250.peg.220	CDS	1	258346	259095	1	+	750	hypothetical protein	- none -
fig|6666666.563250.peg.221	CDS	1	259141	259296	1	+	156	Uncharacterized protein Fjoh_2767	- none -
fig|6666666.563250.peg.222	CDS	1	259487	260308	2	+	822	hypothetical protein	- none -
fig|6666666.563250.peg.223	CDS	1	260891	260379	-2	-	513	Adenine phosphoribosyltransferase (EC 2.4.2.7)	Purine conversions; <br>cAMP signaling in bacteria
fig|6666666.563250.peg.224	CDS	1	261484	262731	1	+	1248	hypothetical protein	- none -
fig|6666666.563250.peg.225	CDS	1	262834	267786	1	+	4953	hypothetical protein	- none -
fig|6666666.563250.peg.226	CDS	1	267810	271640	3	+	3831	hypothetical protein	- none -
fig|6666666.563250.peg.227	CDS	1	271630	272100	1	+	471	hypothetical protein	- none -
fig|6666666.563250.peg.228	CDS	1	272531	273427	2	+	897	hypothetical protein	- none -
fig|6666666.563250.peg.229	CDS	1	273431	273784	2	+	354	hypothetical protein	- none -
fig|6666666.563250.peg.230	CDS	1	273784	274416	1	+	633	hypothetical protein	- none -
fig|6666666.563250.peg.231	CDS	1	274685	275521	2	+	837	hypothetical protein	- none -
fig|6666666.563250.peg.232	CDS	1	275756	276841	2	+	1086	hypothetical protein	- none -
fig|6666666.563250.peg.233	CDS	1	276852	277880	3	+	1029	hypothetical protein	- none -
fig|6666666.563250.peg.234	CDS	1	277884	279218	3	+	1335	hypothetical protein	- none -
fig|6666666.563250.peg.235	CDS	1	279964	279830	-1	-	135	hypothetical protein	- none -
fig|6666666.563250.peg.236	CDS	1	280112	280321	2	+	210	hypothetical protein	- none -
fig|6666666.563250.peg.237	CDS	1	280940	280407	-2	-	534	hypothetical protein	- none -
fig|6666666.563250.peg.238	CDS	1	281813	281607	-2	-	207	hypothetical protein	- none -
fig|6666666.563250.peg.239	CDS	1	283988	282342	-2	-	1647	hypothetical protein	- none -
fig|6666666.563250.peg.240	CDS	1	284742	284942	3	+	201	hypothetical protein	- none -
fig|6666666.563250.peg.241	CDS	1	288793	285539	-1	-	3255	hypothetical protein	- none -
fig|6666666.563250.peg.242	CDS	1	289203	289051	-3	-	153	hypothetical protein	- none -
fig|6666666.563250.peg.243	CDS	1	290867	289521	-2	-	1347	hypothetical protein	- none -
fig|6666666.563250.peg.244	CDS	1	292315	290864	-1	-	1452	hypothetical protein	- none -
fig|6666666.563250.peg.245	CDS	1	294806	292320	-2	-	2487	hypothetical protein	- none -
fig|6666666.563250.peg.246	CDS	1	295521	294826	-3	-	696	Efflux ABC transporter, ATP-binding protein	- none -
fig|6666666.563250.peg.247	CDS	1	296091	295786	-3	-	306	hypothetical protein	- none -
fig|6666666.563250.peg.248	CDS	1	296783	296908	2	+	126	hypothetical protein	- none -
fig|6666666.563250.peg.249	CDS	1	296905	298404	1	+	1500	Cysteinyl-tRNA synthetase (EC 6.1.1.16)	tRNA aminoacylation, Cys
fig|6666666.563250.peg.250	CDS	1	298508	300868	2	+	2361	TonB-dependent receptor; Outer membrane receptor for ferrienterochelin and colicins	Ton and Tol transport systems
fig|6666666.563250.peg.251	CDS	1	301126	301428	1	+	303	hypothetical protein	- none -
fig|6666666.563250.peg.252	CDS	1	301752	303107	3	+	1356	hypothetical protein	- none -
fig|6666666.563250.peg.253	CDS	1	304812	303547	-3	-	1266	hypothetical protein	- none -
fig|6666666.563250.peg.254	CDS	1	306955	305093	-1	-	1863	Chitinase (EC 3.2.1.14)	- none -
fig|6666666.563250.peg.255	CDS	1	307877	307248	-2	-	630	hypothetical protein	- none -
fig|6666666.563250.peg.256	CDS	1	308620	308003	-1	-	618	hypothetical protein	- none -
fig|6666666.563250.peg.257	CDS	1	308797	308967	1	+	171	hypothetical protein	- none -
fig|6666666.563250.peg.258	CDS	1	309153	309019	-3	-	135	hypothetical protein	- none -
fig|6666666.563250.peg.259	CDS	1	309501	309265	-3	-	237	hypothetical protein	- none -
fig|6666666.563250.peg.260	CDS	1	309723	309610	-3	-	114	hypothetical protein	- none -
fig|6666666.563250.peg.261	CDS	1	310756	311475	1	+	720	Oxidoreductase, short-chain dehydrogenase/reductase family	- none -
fig|6666666.563250.peg.262	CDS	1	314889	311650	-3	-	3240	Outer membrane TonB-dependent transporter, utilization system for glycans and polysaccharides (PUL), SusC family	- none -
fig|6666666.563250.peg.263	CDS	1	315887	315123	-2	-	765	hypothetical protein	- none -
fig|6666666.563250.peg.264	CDS	1	316548	315880	-3	-	669	hypothetical protein	- none -
fig|6666666.563250.peg.265	CDS	1	318043	316580	-1	-	1464	hypothetical protein	- none -
fig|6666666.563250.peg.266	CDS	1	318648	318040	-3	-	609	hypothetical protein	- none -
fig|6666666.563250.peg.267	CDS	1	319358	318672	-2	-	687	hypothetical protein	- none -
fig|6666666.563250.peg.268	CDS	1	319969	319355	-1	-	615	bacteriophytochrome heme oxygenase BphO	Oxidative stress
fig|6666666.563250.peg.269	CDS	1	320594	320451	-2	-	144	hypothetical protein	- none -
fig|6666666.563250.peg.270	CDS	1	320700	320897	3	+	198	hypothetical protein	- none -
fig|6666666.563250.peg.271	CDS	1	321339	321085	-3	-	255	hypothetical protein	- none -
fig|6666666.563250.peg.272	CDS	1	321650	322201	2	+	552	hypothetical protein	- none -
fig|6666666.563250.peg.273	CDS	1	323273	322272	-2	-	1002	hypothetical protein	- none -
fig|6666666.563250.peg.274	CDS	1	323959	323669	-1	-	291	hypothetical protein	- none -
fig|6666666.563250.peg.275	CDS	1	324356	324237	-2	-	120	hypothetical protein	- none -
fig|6666666.563250.peg.276	CDS	1	324543	324418	-3	-	126	hypothetical protein	- none -
fig|6666666.563250.peg.277	CDS	1	324792	326720	3	+	1929	hypothetical protein	- none -
fig|6666666.563250.peg.278	CDS	1	326710	327459	1	+	750	hypothetical protein	- none -
fig|6666666.563250.peg.279	CDS	1	328204	329502	1	+	1299	hypothetical protein	- none -
fig|6666666.563250.peg.280	CDS	1	330237	333695	3	+	3459	Glycosyl hydrolase, BNR repeat precursor	- none -
fig|6666666.563250.peg.281	CDS	1	334552	333800	-1	-	753	hypothetical protein	- none -
fig|6666666.563250.peg.282	CDS	1	334600	335058	1	+	459	RidA/YER057c/UK114 superfamily, group 1	- none -
fig|6666666.563250.peg.283	CDS	1	335863	335132	-1	-	732	hypothetical protein	- none -
fig|6666666.563250.peg.284	CDS	1	336012	336140	3	+	129	hypothetical protein	- none -
fig|6666666.563250.peg.285	CDS	1	337131	336334	-3	-	798	two-component system response regulator	- none -
fig|6666666.563250.peg.286	CDS	1	337157	337888	2	+	732	hypothetical protein	- none -
fig|6666666.563250.peg.287	CDS	1	339944	337941	-2	-	2004	Alkyl sulfatase and related hydrolases, MBL-fold metallo-hydrolase superfamily	- none -
fig|6666666.563250.peg.288	CDS	1	341857	340817	-1	-	1041	hypothetical protein	- none -
fig|6666666.563250.peg.289	CDS	1	342277	341870	-1	-	408	hypothetical protein	- none -
fig|6666666.563250.peg.290	CDS	1	342475	343158	1	+	684	hypothetical protein	- none -
fig|6666666.563250.peg.291	CDS	1	347288	343215	-2	-	4074	hypothetical protein	- none -
fig|6666666.563250.peg.292	CDS	1	351912	348169	-3	-	3744	hypothetical protein	- none -
fig|6666666.563250.peg.293	CDS	1	352824	352666	-3	-	159	hypothetical protein	- none -
fig|6666666.563250.peg.294	CDS	1	353782	352982	-1	-	801	hypothetical protein	- none -
fig|6666666.563250.peg.295	CDS	1	355256	353898	-2	-	1359	hypothetical protein	- none -
fig|6666666.563250.peg.296	CDS	1	355606	356679	1	+	1074	hypothetical protein	- none -
fig|6666666.563250.peg.297	CDS	1	356676	357371	3	+	696	Two-component system response regulator	- none -
fig|6666666.563250.peg.298	CDS	1	357481	358332	1	+	852	Cytochrome c-type biogenesis protein DsbD, protein-disulfide reductase (EC 1.8.1.8)	Biogenesis of c-type cytochromes; <br>Periplasmic disulfide interchange
fig|6666666.563250.peg.299	CDS	1	358564	359943	1	+	1380	hypothetical protein	- none -
fig|6666666.563250.peg.300	CDS	1	361285	360023	-1	-	1263	hypothetical protein	- none -
fig|6666666.563250.peg.301	CDS	1	361724	361945	2	+	222	hypothetical protein	- none -
fig|6666666.563250.peg.302	CDS	1	362235	362119	-3	-	117	hypothetical protein	- none -
fig|6666666.563250.peg.303	CDS	1	362289	362924	3	+	636	3-demethylubiquinone-9 3-methyltransferase (EC 2.1.1.64)	- none -
fig|6666666.563250.peg.304	CDS	1	363393	362914	-3	-	480	hypothetical protein	- none -
fig|6666666.563250.peg.305	CDS	1	364426	363557	-1	-	870	hypothetical protein	- none -
fig|6666666.563250.peg.306	CDS	1	364786	366252	1	+	1467	Two-component system sensor histidine kinase	- none -
fig|6666666.563250.peg.307	CDS	1	366255	366986	3	+	732	Two-component transcriptional response regulator, OmpR family	- none -
fig|6666666.563250.peg.308	CDS	1	367478	366975	-2	-	504	hypothetical protein	- none -
fig|6666666.563250.peg.309	CDS	1	368702	367509	-2	-	1194	Zeaxanthin glucosyl transferase	- none -
fig|6666666.563250.peg.310	CDS	1	369585	368758	-3	-	828	hypothetical protein	- none -
fig|6666666.563250.peg.311	CDS	1	369906	369598	-3	-	309	hypothetical protein	- none -
fig|6666666.563250.peg.312	CDS	1	374192	369894	-2	-	4299	modular polyketide synthase	- none -
fig|6666666.563250.peg.313	CDS	1	381196	374219	-1	-	6978	modular polyketide synthase	- none -
fig|6666666.563250.peg.314	CDS	1	381772	381656	-1	-	117	hypothetical protein	- none -
fig|6666666.563250.peg.315	CDS	1	381819	382382	3	+	564	Uncharacterized protein YqaC	- none -
fig|6666666.563250.peg.316	CDS	1	383476	382409	-1	-	1068	hypothetical protein	- none -
fig|6666666.563250.peg.317	CDS	1	384497	383766	-2	-	732	Malonyl CoA-acyl carrier protein transacylase	- none -
fig|6666666.563250.peg.318	CDS	1	385260	384568	-3	-	693	hypothetical protein	- none -
fig|6666666.563250.peg.319	CDS	1	386500	385445	-1	-	1056	Polyketide synthase modules and related proteins	- none -
fig|6666666.563250.peg.320	CDS	1	387882	386656	-3	-	1227	hypothetical protein	- none -
fig|6666666.563250.peg.321	CDS	1	395258	387927	-2	-	7332	Polyketide synthase modules and related proteins	- none -
fig|6666666.563250.peg.322	CDS	1	406308	395290	-3	-	11019	Polyketide synthase modules and related proteins	- none -
fig|6666666.563250.peg.323	CDS	1	417458	406320	-2	-	11139	Polyketide synthase modules and related proteins	- none -
fig|6666666.563250.peg.324	CDS	1	427367	417474	-2	-	9894	Polyketide synthase modules and related proteins	- none -
fig|6666666.563250.peg.325	CDS	1	428813	427425	-2	-	1389	Siderophore biosynthesis diaminobutyrate--2-oxoglutarate aminotransferase (EC 2.6.1.76)	DAP (1,3-diaminopropane) production
fig|6666666.563250.peg.326	CDS	1	429982	429062	-1	-	921	hypothetical protein	- none -
fig|6666666.563250.peg.327	CDS	1	430269	430421	3	+	153	hypothetical protein	- none -
fig|6666666.563250.peg.328	CDS	1	432352	430625	-1	-	1728	hypothetical protein	- none -
fig|6666666.563250.peg.329	CDS	1	433521	432355	-3	-	1167	hypothetical protein	- none -
fig|6666666.563250.peg.330	CDS	1	436285	433529	-1	-	2757	TonB-dependent receptor	Ton and Tol transport systems
fig|6666666.563250.peg.331	CDS	1	437034	436315	-3	-	720	hypothetical protein	- none -
fig|6666666.563250.peg.332	CDS	1	437268	438149	3	+	882	hypothetical protein	- none -
fig|6666666.563250.peg.333	CDS	1	438808	438194	-1	-	615	FMN-dependent NADH-azoreductase	- none -
fig|6666666.563250.peg.334	CDS	1	438970	439860	1	+	891	hypothetical protein	- none -
fig|6666666.563250.peg.335	CDS	1	440076	440777	3	+	702	hypothetical protein	- none -
fig|6666666.563250.peg.336	CDS	1	440795	441724	2	+	930	hypothetical protein	- none -
fig|6666666.563250.peg.337	CDS	1	441807	442388	3	+	582	Isochorismatase (EC 3.3.2.1)	Chorismate: Intermediate for synthesis of Tryptophan, PAPA antibiotics, PABA, 3-hydroxyanthranilate and more.
fig|6666666.563250.peg.338	CDS	1	443061	442402	-3	-	660	UPF0056 inner membrane protein MarC	- none -
fig|6666666.563250.peg.339	CDS	1	443294	444055	2	+	762	Metal-dependent hydrolase	- none -
fig|6666666.563250.peg.340	CDS	1	444195	445658	3	+	1464	Catalase KatE (EC 1.11.1.6)	- none -
fig|6666666.563250.peg.341	CDS	1	445827	446582	3	+	756	hypothetical protein	- none -
fig|6666666.563250.peg.342	CDS	1	446601	446834	3	+	234	hypothetical protein PA0941	- none -
fig|6666666.563250.peg.343	CDS	1	446914	447171	1	+	258	hypothetical protein	- none -
fig|6666666.563250.peg.344	CDS	1	447203	447940	2	+	738	Cell division protein FtsH (EC 3.4.24.-)	Cell division-ribosomal stress proteins cluster; <br>Folate biosynthesis cluster
fig|6666666.563250.peg.345	CDS	1	447953	448549	2	+	597	Transcriptional regulator, MarR family	- none -
fig|6666666.563250.peg.346	CDS	1	448546	449283	1	+	738	Pyridoxal phosphate-containing protein YggS	- none -
fig|6666666.563250.peg.347	CDS	1	449354	449473	2	+	120	hypothetical protein	- none -
fig|6666666.563250.peg.348	CDS	1	449607	451424	3	+	1818	hypothetical protein	- none -
fig|6666666.563250.peg.349	CDS	1	451650	452393	3	+	744	putative short-chain dehydrogenase/reductase	- none -
fig|6666666.563250.peg.350	CDS	1	452564	452902	2	+	339	hypothetical protein	- none -
fig|6666666.563250.peg.351	CDS	1	452953	453453	1	+	501	Azurin	Copper transport and blue copper proteins
fig|6666666.563250.peg.352	CDS	1	453780	455288	3	+	1509	Siderophore biosynthesis L-2,4-diaminobutyrate decarboxylase	DAP (1,3-diaminopropane) production
fig|6666666.563250.peg.353	CDS	1	455344	456681	1	+	1338	Siderophore [Alcaligin-like] biosynthetic enzyme (EC 1.14.13.59) @ Siderophore biosynthesis protein, monooxygenase	- none -
fig|6666666.563250.peg.354	CDS	1	456701	456856	2	+	156	hypothetical protein	- none -
fig|6666666.563250.peg.355	CDS	1	456882	458066	3	+	1185	hypothetical protein	- none -
fig|6666666.563250.peg.356	CDS	1	458233	460050	1	+	1818	Desferrioxamine E biosynthesis protein DesD @ Siderophore synthetase superfamily, group C @ Siderophore synthetase component, ligase	- none -
fig|6666666.563250.peg.357	CDS	1	460062	460682	3	+	621	Acetyltransferase	- none -
fig|6666666.563250.peg.358	CDS	1	460702	462510	1	+	1809	Desferrioxamine E biosynthesis protein DesD @ Siderophore synthetase superfamily, group C @ Siderophore synthetase component, ligase	- none -
fig|6666666.563250.peg.359	CDS	1	462526	463113	1	+	588	Nitroreductase family protein	- none -
fig|6666666.563250.peg.360	CDS	1	464211	463201	-3	-	1011	hypothetical protein	- none -
fig|6666666.563250.peg.361	CDS	1	464306	466654	2	+	2349	TonB-dependent receptor	Ton and Tol transport systems
fig|6666666.563250.peg.362	CDS	1	466680	467999	3	+	1320	hypothetical protein	- none -
fig|6666666.563250.peg.363	CDS	1	469015	468176	-1	-	840	Milk-clotting protease	- none -
fig|6666666.563250.peg.364	CDS	1	469815	469513	-3	-	303	ClpS-like protein Fjoh_3508	- none -
fig|6666666.563250.peg.365	CDS	1	470687	469845	-2	-	843	Ribosomal protein L11 methyltransferase	- none -
fig|6666666.563250.peg.366	CDS	1	471559	470807	-1	-	753	Triosephosphate isomerase (EC 5.3.1.1)	- none -
fig|6666666.563250.peg.367	CDS	1	472673	471603	-2	-	1071	Dipeptide ABC transporter, permease protein DppB (TC 3.A.1.5.2)	- none -
fig|6666666.563250.peg.368	CDS	1	473818	472724	-1	-	1095	Uncharacterized protein BT_3928	- none -
fig|6666666.563250.peg.369	CDS	1	474455	473907	-2	-	549	hypothetical protein	- none -
fig|6666666.563250.peg.370	CDS	1	474560	475390	2	+	831	Dihydropteroate synthase (EC 2.5.1.15)	Folate Biosynthesis; <br>Folate biosynthesis cluster
fig|6666666.563250.peg.371	CDS	1	475764	477326	3	+	1563	hypothetical protein	- none -
fig|6666666.563250.peg.372	CDS	1	477556	477804	1	+	249	hypothetical protein	- none -
fig|6666666.563250.peg.373	CDS	1	477862	478905	1	+	1044	hypothetical protein	- none -
fig|6666666.563250.peg.374	CDS	1	478980	480008	3	+	1029	hypothetical protein	- none -
fig|6666666.563250.peg.375	CDS	1	480183	480959	3	+	777	Diadenylate cyclase spyDAC; Bacterial checkpoint controller DisA with nucleotide-binding domain	Bacterial checkpoint-control-related cluster; <br>Bacterial checkpoint-control-related cluster
fig|6666666.563250.peg.376	CDS	1	481732	481055	-1	-	678	Two-component system response regulator	- none -
fig|6666666.563250.peg.377	CDS	1	482825	481806	-2	-	1020	putative two-component system sensor protein, no kinase domain	- none -
fig|6666666.563250.peg.378	CDS	1	485149	482843	-1	-	2307	Putative TonB-dependent receptor	- none -
fig|6666666.563250.peg.379	CDS	1	487027	485264	-1	-	1764	Efflux ABC transporter, permease/ATP-binding protein	- none -
fig|6666666.563250.peg.380	CDS	1	487802	487008	-2	-	795	tRNA pseudouridine(38-40) synthase (EC 5.4.99.12)	- none -
fig|6666666.563250.peg.381	CDS	1	487886	488380	2	+	495	FIG00648984: hypothetical protein	- none -
fig|6666666.563250.peg.382	CDS	1	488964	488449	-3	-	516	hypothetical protein	- none -
fig|6666666.563250.peg.383	CDS	1	489075	490775	3	+	1701	Transcription termination factor Rho	Transcription factors bacterial
fig|6666666.563250.peg.384	CDS	1	490899	491561	3	+	663	Peptide-methionine (S)-S-oxide reductase MsrA (EC 1.8.4.11)	- none -
fig|6666666.563250.peg.385	CDS	1	491993	493150	2	+	1158	hypothetical protein	- none -
fig|6666666.563250.peg.386	CDS	1	494431	493538	-1	-	894	Methenyltetrahydrofolate cyclohydrolase (EC 3.5.4.9) / Methylenetetrahydrofolate dehydrogenase (NADP+) (EC 1.5.1.5)	5-FCL-like protein; <br>One-carbon metabolism by tetrahydropterines; <br>One-carbon metabolism by tetrahydropterines
fig|6666666.563250.peg.387	CDS	1	495800	494472	-2	-	1329	Signal recognition particle protein Ffh	- none -
fig|6666666.563250.peg.388	CDS	1	497895	496042	-3	-	1854	Arginyl-tRNA synthetase (EC 6.1.1.19)	tRNA aminoacylation, Arg
fig|6666666.563250.peg.389	CDS	1	498511	498095	-1	-	417	Predicted transcriptional regulator of sulfate transport, Rrf2 family	Rrf2 family transcriptional regulators
fig|6666666.563250.peg.390	CDS	1	499463	498525	-2	-	939	hypothetical protein	- none -
fig|6666666.563250.peg.391	CDS	1	500433	499471	-3	-	963	Arginase (EC 3.5.3.1)	Arginine and Ornithine Degradation
fig|6666666.563250.peg.392	CDS	1	501874	500588	-1	-	1287	Citrate synthase (si) (EC 2.3.3.1)	Glyoxylate bypass
fig|6666666.563250.peg.393	CDS	1	503408	502095	-2	-	1314	Enolase (EC 4.2.1.11)	- none -
fig|6666666.563250.peg.394	CDS	1	504708	503602	-3	-	1107	Carbamoyl-phosphate synthase small chain (EC 6.3.5.5)	- none -
fig|6666666.563250.peg.395	CDS	1	505313	504840	-2	-	474	LSU ribosomal protein L17p	- none -
fig|6666666.563250.peg.396	CDS	1	506366	505374	-2	-	993	DNA-directed RNA polymerase alpha subunit (EC 2.7.7.6)	RNA polymerase bacterial
fig|6666666.563250.peg.397	CDS	1	506995	506390	-1	-	606	SSU ribosomal protein S4p (S9e) @ SSU ribosomal protein S4p (S9e), zinc-independent	Ribosome SSU bacterial
fig|6666666.563250.peg.398	CDS	1	507494	507111	-2	-	384	SSU ribosomal protein S11p (S14e)	Ribosome SSU bacterial
fig|6666666.563250.peg.399	CDS	1	507877	507503	-1	-	375	SSU ribosomal protein S13p (S18e)	Ribosome SSU bacterial
fig|6666666.563250.peg.400	CDS	1	508331	508116	-2	-	216	Translation initiation factor 1	Translation initiation factors bacterial
fig|6666666.563250.peg.401	CDS	1	509673	508333	-3	-	1341	Protein translocase subunit SecY	- none -
fig|6666666.563250.peg.402	CDS	1	510136	509684	-1	-	453	LSU ribosomal protein L15p (L27Ae)	- none -
fig|6666666.563250.peg.403	CDS	1	510325	510146	-1	-	180	LSU ribosomal protein L30p (L7e)	- none -
fig|6666666.563250.peg.404	CDS	1	510861	510337	-3	-	525	SSU ribosomal protein S5p (S2e)	Ribosome SSU bacterial
fig|6666666.563250.peg.405	CDS	1	511224	510868	-3	-	357	LSU ribosomal protein L18p (L5e)	- none -
fig|6666666.563250.peg.406	CDS	1	511780	511235	-1	-	546	LSU ribosomal protein L6p (L9e)	- none -
fig|6666666.563250.peg.407	CDS	1	512200	511802	-1	-	399	SSU ribosomal protein S8p (S15Ae)	Ribosome SSU bacterial
fig|6666666.563250.peg.408	CDS	1	512539	512270	-1	-	270	SSU ribosomal protein S14p (S29e) @ SSU ribosomal protein S14p (S29e), zinc-independent	Ribosome SSU bacterial; <br>Ribosome SSU bacterial
fig|6666666.563250.peg.409	CDS	1	513093	512542	-3	-	552	LSU ribosomal protein L5p (L11e)	- none -
fig|6666666.563250.peg.410	CDS	1	513407	513096	-2	-	312	LSU ribosomal protein L24p (L26e)	- none -
fig|6666666.563250.peg.411	CDS	1	513789	513421	-3	-	369	LSU ribosomal protein L14p (L23e)	- none -
fig|6666666.563250.peg.412	CDS	1	514049	513792	-2	-	258	SSU ribosomal protein S17p (S11e)	Ribosome SSU bacterial
fig|6666666.563250.peg.413	CDS	1	514256	514062	-2	-	195	LSU ribosomal protein L29p (L35e)	- none -
fig|6666666.563250.peg.414	CDS	1	514689	514270	-3	-	420	LSU ribosomal protein L16p (L10e)	- none -
fig|6666666.563250.peg.415	CDS	1	515432	514710	-2	-	723	SSU ribosomal protein S3p (S3e)	Ribosome SSU bacterial
fig|6666666.563250.peg.416	CDS	1	515851	515441	-1	-	411	LSU ribosomal protein L22p (L17e)	- none -
fig|6666666.563250.peg.417	CDS	1	516138	515860	-3	-	279	SSU ribosomal protein S19p (S15e)	Ribosome SSU bacterial
fig|6666666.563250.peg.418	CDS	1	516969	516145	-3	-	825	LSU ribosomal protein L2p (L8e)	- none -
fig|6666666.563250.peg.419	CDS	1	517269	516979	-3	-	291	LSU ribosomal protein L23p (L23Ae)	- none -
fig|6666666.563250.peg.420	CDS	1	517904	517275	-2	-	630	LSU ribosomal protein L4p (L1e)	- none -
fig|6666666.563250.peg.421	CDS	1	518521	517904	-1	-	618	LSU ribosomal protein L3p (L3e)	- none -
fig|6666666.563250.peg.422	CDS	1	519047	518742	-2	-	306	SSU ribosomal protein S10p (S20e)	Ribosome SSU bacterial
fig|6666666.563250.peg.423	CDS	1	521185	519059	-1	-	2127	Translation elongation factor G	Mycobacterium virulence operon involved in protein synthesis (SSU ribosomal proteins); <br>Translation elongation factor G family; <br>Translation elongation factors bacterial
fig|6666666.563250.peg.424	CDS	1	521674	521198	-1	-	477	SSU ribosomal protein S7p (S5e)	Mycobacterium virulence operon involved in protein synthesis (SSU ribosomal proteins); <br>Ribosome SSU bacterial
fig|6666666.563250.peg.425	CDS	1	522077	521703	-2	-	375	SSU ribosomal protein S12p (S23e)	Mycobacterium virulence operon involved in protein synthesis (SSU ribosomal proteins); <br>Ribosome SSU bacterial
fig|6666666.563250.peg.426	CDS	1	522475	522245	-1	-	231	hypothetical protein	- none -
fig|6666666.563250.peg.427	CDS	1	522644	525874	2	+	3231	Outer membrane TonB-dependent transporter, utilization system for glycans and polysaccharides (PUL), SusC family	- none -
fig|6666666.563250.peg.428	CDS	1	525893	527602	2	+	1710	Cell surface glycan-binding lipoprotein, utilization system for glycans and polysaccharides (PUL), SusD family	- none -
fig|6666666.563250.peg.429	CDS	1	527616	528626	3	+	1011	hypothetical protein	- none -
fig|6666666.563250.peg.430	CDS	1	529315	532479	1	+	3165	Outer membrane TonB-dependent transporter, utilization system for glycans and polysaccharides (PUL), SusC family	- none -
fig|6666666.563250.peg.431	CDS	1	532491	533879	3	+	1389	Cell surface glycan-binding lipoprotein, utilization system for glycans and polysaccharides (PUL), SusD family	- none -
fig|6666666.563250.peg.432	CDS	1	534173	537214	2	+	3042	Outer membrane TonB-dependent transporter, utilization system for glycans and polysaccharides (PUL), SusC family	- none -
fig|6666666.563250.peg.433	CDS	1	537225	538673	3	+	1449	Cell surface glycan-binding lipoprotein, utilization system for glycans and polysaccharides (PUL), SusD family	- none -
fig|6666666.563250.peg.434	CDS	1	539109	542315	3	+	3207	Outer membrane TonB-dependent transporter, utilization system for glycans and polysaccharides (PUL), SusC family	- none -
fig|6666666.563250.peg.435	CDS	1	542322	543923	3	+	1602	Cell surface glycan-binding lipoprotein, utilization system for glycans and polysaccharides (PUL), SusD family	- none -
fig|6666666.563250.peg.436	CDS	1	544492	547596	1	+	3105	Outer membrane TonB-dependent transporter, utilization system for glycans and polysaccharides (PUL), SusC family	- none -
fig|6666666.563250.peg.437	CDS	1	547614	549107	3	+	1494	Cell surface glycan-binding lipoprotein, utilization system for glycans and polysaccharides (PUL), SusD family	- none -
fig|6666666.563250.peg.438	CDS	1	549194	549928	2	+	735	23S rRNA (guanosine(2251)-2&#39;-O)-methyltransferase (EC 2.1.1.185)	- none -
fig|6666666.563250.peg.439	CDS	1	550675	549929	-1	-	747	hypothetical protein	- none -
fig|6666666.563250.peg.440	CDS	1	550809	552086	3	+	1278	Replication-associated recombination protein RarA	- none -
fig|6666666.563250.peg.441	CDS	1	552878	552096	-2	-	783	FIG00552529: hypothetical protein	- none -
fig|6666666.563250.peg.442	CDS	1	554376	552970	-3	-	1407	hypothetical protein	- none -
fig|6666666.563250.peg.443	CDS	1	554948	554373	-2	-	576	hypothetical protein	- none -
fig|6666666.563250.peg.444	CDS	1	555680	554994	-2	-	687	Putative FMN hydrolase (EC 3.1.3.-); 5-Amino-6-(5&#39;-phosphoribitylamino)uracil phosphatase	Riboflavin, FMN and FAD metabolism
fig|6666666.563250.peg.445	CDS	1	557006	555690	-2	-	1317	hypothetical protein	- none -
fig|6666666.563250.peg.446	CDS	1	557701	557003	-1	-	699	UPF0758 family protein	- none -
fig|6666666.563250.peg.447	CDS	1	557929	558375	1	+	447	hypothetical protein	- none -
fig|6666666.563250.peg.448	CDS	1	558475	559080	1	+	606	Transcriptional regulator	- none -
fig|6666666.563250.peg.449	CDS	1	560429	559074	-2	-	1356	Amino acid ligase similar to peptidoglycan synthetases	- none -
fig|6666666.563250.peg.450	CDS	1	560775	566867	3	+	6093	FIG00652507: hypothetical protein	- none -
fig|6666666.563250.peg.451	CDS	1	567934	566987	-1	-	948	hypothetical protein	- none -
fig|6666666.563250.peg.452	CDS	1	568304	568206	-2	-	99	hypothetical protein	- none -
fig|6666666.563250.peg.453	CDS	1	568770	569429	3	+	660	hypothetical protein	- none -
fig|6666666.563250.peg.454	CDS	1	570487	569498	-1	-	990	Transcriptional regulator, AraC family	- none -
fig|6666666.563250.peg.455	CDS	1	570595	572979	1	+	2385	hypothetical protein	- none -
fig|6666666.563250.peg.456	CDS	1	573111	573845	3	+	735	Serine acetyltransferase (EC 2.3.1.30)	Cysteine Biosynthesis; <br>Methionine Biosynthesis
fig|6666666.563250.peg.457	CDS	1	573860	574879	2	+	1020	Similar to coenzyme PQQ synthesis protein B	- none -
fig|6666666.563250.peg.458	CDS	1	575890	574892	-1	-	999	GTP-binding protein Obg	CBSS-176279.3.peg.868
fig|6666666.563250.peg.459	CDS	1	577141	576035	-1	-	1107	Hypoxanthine-guanine phosphoribosyltransferase (EC 2.4.2.8) / Adenylate kinase (EC 2.7.4.3)	Cell division-ribosomal stress proteins cluster; <br>Folate biosynthesis cluster; <br>Purine conversions; <br>Purine conversions
fig|6666666.563250.peg.460	CDS	1	577305	578465	3	+	1161	N5-carboxyaminoimidazole ribonucleotide synthase (EC 6.3.4.18)	- none -
fig|6666666.563250.peg.461	CDS	1	578462	578947	2	+	486	N5-carboxyaminoimidazole ribonucleotide mutase (EC 5.4.99.18)	- none -
fig|6666666.563250.peg.462	CDS	1	579124	579255	1	+	132	hypothetical protein	- none -
fig|6666666.563250.peg.463	CDS	1	579735	581756	3	+	2022	Dipeptidyl carboxypeptidase Dcp (EC 3.4.15.5)	Protein degradation
fig|6666666.563250.peg.464	CDS	1	584182	581819	-1	-	2364	hypothetical protein	- none -
fig|6666666.563250.peg.465	CDS	1	586643	584640	-2	-	2004	hypothetical protein	- none -
fig|6666666.563250.peg.466	CDS	1	587017	587136	1	+	120	hypothetical protein	- none -
fig|6666666.563250.peg.467	CDS	1	587133	588449	3	+	1317	Large repetitive protein	- none -
fig|6666666.563250.peg.468	CDS	1	588645	589199	3	+	555	RNA polymerase ECF-type sigma factor	- none -
fig|6666666.563250.peg.469	CDS	1	589204	589482	1	+	279	hypothetical protein	- none -
fig|6666666.563250.peg.470	CDS	1	589530	589784	3	+	255	hypothetical protein	- none -
fig|6666666.563250.peg.471	CDS	1	590600	589785	-2	-	816	hypothetical protein	- none -
fig|6666666.563250.peg.472	CDS	1	590687	593587	2	+	2901	Glycine dehydrogenase [decarboxylating] (glycine cleavage system P protein) (EC 1.4.4.2)	Glycine and Serine Utilization; <br>Glycine cleavage system
fig|6666666.563250.peg.473	CDS	1	594053	593682	-2	-	372	hypothetical protein	- none -
fig|6666666.563250.peg.474	CDS	1	594167	594439	2	+	273	hypothetical protein	- none -
fig|6666666.563250.peg.475	CDS	1	594479	594649	2	+	171	hypothetical protein	- none -
fig|6666666.563250.peg.476	CDS	1	594839	595363	2	+	525	hypothetical protein	- none -
fig|6666666.563250.peg.477	CDS	1	595385	596236	2	+	852	Glycosyltransferase	- none -
fig|6666666.563250.peg.478	CDS	1	598029	596368	-3	-	1662	Alkaline phosphatase (EC 3.1.3.1); Type I phosphodiesterase/nucleotide pyrophosphatase precursor	Phosphate metabolism; <br>Pterin synthesis related cluster
fig|6666666.563250.peg.479	CDS	1	598144	598881	1	+	738	Phospholipid ABC transporter permease protein MlaE	- none -
fig|6666666.563250.peg.480	CDS	1	598881	599645	3	+	765	Phospholipid ABC transporter ATP-binding protein MlaF	- none -
fig|6666666.563250.peg.481	CDS	1	601193	599727	-2	-	1467	Integral membrane protein	- none -
fig|6666666.563250.peg.482	CDS	1	602272	601196	-1	-	1077	Mannose-1-phosphate guanylyltransferase (EC 2.7.7.13)	- none -
fig|6666666.563250.peg.483	CDS	1	602769	602275	-3	-	495	hypothetical protein	- none -
fig|6666666.563250.peg.484	CDS	1	603779	602928	-2	-	852	hypothetical protein	- none -
fig|6666666.563250.peg.485	CDS	1	604021	604872	1	+	852	hypothetical protein	- none -
fig|6666666.563250.peg.486	CDS	1	604869	605759	3	+	891	hypothetical protein	- none -
fig|6666666.563250.peg.487	CDS	1	605900	607210	2	+	1311	Homolog of fucose/glucose/galactose permeases	- none -
fig|6666666.563250.peg.488	CDS	1	608184	607501	-3	-	684	Oxidoreductase, short-chain dehydrogenase/reductase family	- none -
fig|6666666.563250.peg.489	CDS	1	609382	608219	-1	-	1164	Aminopeptidase	- none -
fig|6666666.563250.peg.490	CDS	1	610994	609375	-2	-	1620	Dihydrolipoamide acetyltransferase component of pyruvate dehydrogenase complex (EC 2.3.1.12)	5-FCL-like protein; <br>Dehydrogenase complexes; <br>Pyruvate metabolism II: acetyl-CoA, acetogenesis from pyruvate
fig|6666666.563250.peg.491	CDS	1	611999	611001	-2	-	999	Pyruvate dehydrogenase E1 component alpha subunit (EC 1.2.4.1)	Dehydrogenase complexes; <br>Pyruvate metabolism II: acetyl-CoA, acetogenesis from pyruvate
fig|6666666.563250.peg.492	CDS	1	613416	612265	-3	-	1152	hypothetical protein	- none -
fig|6666666.563250.peg.493	CDS	1	613766	613596	-2	-	171	hypothetical protein	- none -
fig|6666666.563250.peg.494	CDS	1	614127	615803	3	+	1677	GldJ	- none -
fig|6666666.563250.peg.495	CDS	1	615883	617160	1	+	1278	UDP-N-acetylmuramoyl-tripeptide--D-alanyl-D-alanine ligase (EC 6.3.2.10)	- none -
fig|6666666.563250.peg.496	CDS	1	617776	617153	-1	-	624	DNA repair system specific for alkylated DNA	- none -
fig|6666666.563250.peg.497	CDS	1	620865	617899	-3	-	2967	Alpha-1,2-mannosidase	Mannose Metabolism
fig|6666666.563250.peg.498	CDS	1	622742	621066	-2	-	1677	Cell surface glycan-binding lipoprotein, utilization system for glycans and polysaccharides (PUL), SusD family	- none -
fig|6666666.563250.peg.499	CDS	1	626057	622902	-2	-	3156	Outer membrane TonB-dependent transporter, utilization system for glycans and polysaccharides (PUL), SusC family	- none -
fig|6666666.563250.peg.500	CDS	1	627543	626590	-3	-	954	hypothetical protein	- none -
fig|6666666.563250.peg.501	CDS	1	642357	627637	-3	-	14721	hypothetical protein formerly called flagellar hook-length control protein FliK	- none -
fig|6666666.563250.peg.502	CDS	1	643722	642769	-3	-	954	hypothetical protein	- none -
fig|6666666.563250.peg.503	CDS	1	653835	643816	-3	-	10020	hypothetical protein	- none -
fig|6666666.563250.peg.504	CDS	1	655834	654617	-1	-	1218	Dihydrofolate synthase (EC 6.3.2.12) @ Folylpolyglutamate synthase (EC 6.3.2.17)	Folate Biosynthesis; <br>Folate Biosynthesis
fig|6666666.563250.peg.505	CDS	1	656676	655864	-3	-	813	putative TonB-dependent receptor	- none -
fig|6666666.563250.peg.506	CDS	1	657114	656722	-3	-	393	Biopolymer transport protein ExbD/TolR; potentially related to transport or biosynthesis of folate	Ton and Tol transport systems
fig|6666666.563250.peg.507	CDS	1	657819	657118	-3	-	702	MotA/TolQ/ExbB proton channel family protein	Ton and Tol transport systems
fig|6666666.563250.peg.508	CDS	1	659362	657890	-1	-	1473	Na+/H+ antiporter NhaB	- none -
fig|6666666.563250.peg.509	CDS	1	660662	659427	-2	-	1236	Glu/Leu/Phe/Val dehydrogenase family protein	- none -
fig|6666666.563250.peg.510	CDS	1	661130	662272	2	+	1143	Acyl-CoA dehydrogenase, short-chain specific (EC 1.3.8.1)	- none -
fig|6666666.563250.peg.511	CDS	1	663697	662330	-1	-	1368	Oxidoreductase, Gfo/Idh/MocA family	- none -
fig|6666666.563250.peg.512	CDS	1	664381	664779	1	+	399	Cell wall-associated hydrolase	- none -
fig|6666666.563250.peg.513	CDS	1	669571	669726	1	+	156	hypothetical protein	- none -
fig|6666666.563250.peg.514	CDS	1	670477	670875	1	+	399	Cell wall-associated hydrolase	- none -
fig|6666666.563250.peg.515	CDS	1	677767	675788	-1	-	1980	hypothetical protein	- none -
fig|6666666.563250.peg.516	CDS	1	677877	678497	3	+	621	Ribonuclease HII (EC 3.1.26.4)	Ribonuclease H
fig|6666666.563250.peg.517	CDS	1	678557	681031	2	+	2475	hypothetical protein	- none -
fig|6666666.563250.peg.518	CDS	1	682141	681419	-1	-	723	hypothetical protein	- none -
fig|6666666.563250.peg.519	CDS	1	683098	682211	-1	-	888	hypothetical protein	- none -
fig|6666666.563250.peg.520	CDS	1	683441	683178	-2	-	264	hypothetical protein	- none -
fig|6666666.563250.peg.521	CDS	1	684901	683528	-1	-	1374	hypothetical protein	- none -
fig|6666666.563250.peg.522	CDS	1	686513	685812	-2	-	702	Octanoate-[acyl-carrier-protein]-protein-N-octanoyltransferase (EC 2.3.1.181)	- none -
fig|6666666.563250.peg.523	CDS	1	687423	686659	-3	-	765	hypothetical protein	- none -
fig|6666666.563250.peg.524	CDS	1	687441	687554	3	+	114	hypothetical protein	- none -
fig|6666666.563250.peg.525	CDS	1	687611	687757	2	+	147	hypothetical protein	- none -
fig|6666666.563250.peg.526	CDS	1	688073	689137	2	+	1065	hypothetical protein	- none -
fig|6666666.563250.peg.527	CDS	1	689240	690403	2	+	1164	hypothetical protein	- none -
fig|6666666.563250.peg.528	CDS	1	690494	690967	2	+	474	hypothetical protein	- none -
fig|6666666.563250.peg.529	CDS	1	691242	692930	3	+	1689	Lysyl-tRNA synthetase (class II) (EC 6.1.1.6)	tRNA aminoacylation, Lys
fig|6666666.563250.peg.530	CDS	1	693319	694530	1	+	1212	Zinc-binding GTPase YciC	- none -
fig|6666666.563250.peg.531	CDS	1	694588	696795	1	+	2208	Outer membrane receptor proteins, mostly Fe transport	- none -
fig|6666666.563250.peg.532	CDS	1	697055	697660	2	+	606	hypothetical protein	- none -
fig|6666666.563250.peg.533	CDS	1	698296	697724	-1	-	573	hypothetical protein	- none -
fig|6666666.563250.peg.534	CDS	1	699692	698349	-2	-	1344	hypothetical protein	- none -
fig|6666666.563250.peg.535	CDS	1	700269	699796	-3	-	474	hypothetical protein	- none -
fig|6666666.563250.peg.536	CDS	1	700441	701937	1	+	1497	hypothetical protein	- none -
fig|6666666.563250.peg.537	CDS	1	702324	701992	-3	-	333	hypothetical protein	- none -
fig|6666666.563250.peg.538	CDS	1	703613	702327	-2	-	1287	Glutamate-1-semialdehyde 2,1-aminomutase (EC 5.4.3.8)	- none -
fig|6666666.563250.peg.539	CDS	1	704576	703620	-2	-	957	Hemagglutinin	- none -
fig|6666666.563250.peg.540	CDS	1	705524	704583	-2	-	942	pyridoxal phosphate-dependent deaminase, putative	- none -
fig|6666666.563250.peg.541	CDS	1	705854	705528	-2	-	327	hypothetical protein	- none -
fig|6666666.563250.peg.542	CDS	1	705859	706059	1	+	201	Uncharacterized protein Fjoh_1910	- none -
fig|6666666.563250.peg.543	CDS	1	706138	706671	1	+	534	putative lipoprotein	- none -
fig|6666666.563250.peg.544	CDS	1	706816	707433	1	+	618	hypothetical protein	- none -
fig|6666666.563250.peg.545	CDS	1	707814	708803	3	+	990	Transcriptional regulator, AraC family	- none -
fig|6666666.563250.peg.546	CDS	1	708919	709194	1	+	276	hypothetical protein	- none -
fig|6666666.563250.peg.547	CDS	1	709398	709568	3	+	171	hypothetical protein	- none -
fig|6666666.563250.peg.548	CDS	1	709722	710162	3	+	441	hypothetical protein	- none -
fig|6666666.563250.peg.549	CDS	1	711136	710297	-1	-	840	FIG00652836: hypothetical protein	- none -
fig|6666666.563250.peg.550	CDS	1	713875	711143	-1	-	2733	TonB-dependent receptor	Ton and Tol transport systems
fig|6666666.563250.peg.551	CDS	1	714922	713966	-1	-	957	putative anti-sigma factor	- none -
fig|6666666.563250.peg.552	CDS	1	715480	714977	-1	-	504	RNA polymerase ECF-type sigma factor	- none -
fig|6666666.563250.peg.553	CDS	1	716255	715632	-2	-	624	Threonine efflux protein	- none -
fig|6666666.563250.peg.554	CDS	1	717084	716407	-3	-	678	Transcriptional regulator, ArsR family	- none -
fig|6666666.563250.peg.555	CDS	1	717767	717180	-2	-	588	cAMP-binding proteins - catabolite gene activator and regulatory subunit of cAMP-dependent protein kinases	cAMP signaling in bacteria
fig|6666666.563250.peg.556	CDS	1	718255	717782	-1	-	474	tRNA (cytidine(34)-2&#39;-O)-methyltransferase (EC 2.1.1.207)	RNA methylation
fig|6666666.563250.peg.557	CDS	1	719282	718275	-2	-	1008	pyridoxal-phosphate dependent enzyme family protein	- none -
fig|6666666.563250.peg.558	CDS	1	720098	719595	-2	-	504	Uncharacterized protein Fjoh_4068	- none -
fig|6666666.563250.peg.559	CDS	1	721591	720095	-1	-	1497	Uncharacterized ankyrin-repeat-containing protein Fjoh_4067	- none -
fig|6666666.563250.peg.560	CDS	1	722136	721741	-3	-	396	hypothetical protein	- none -
fig|6666666.563250.peg.561	CDS	1	723796	722147	-1	-	1650	Ribonucleotide reductase of class Ia (aerobic), alpha subunit (EC 1.17.4.1)	Ribonucleotide reduction
fig|6666666.563250.peg.562	CDS	1	724955	723981	-2	-	975	Ribonucleotide reductase of class Ia (aerobic), beta subunit (EC 1.17.4.1)	Ribonucleotide reduction
fig|6666666.563250.peg.563	CDS	1	726292	725387	-1	-	906	Transcriptional regulator, AraC family	- none -
fig|6666666.563250.peg.564	CDS	1	728681	726297	-2	-	2385	TonB-dependent receptor	Ton and Tol transport systems
fig|6666666.563250.peg.565	CDS	1	729492	729142	-3	-	351	hypothetical protein	- none -
fig|6666666.563250.peg.566	CDS	1	735909	729637	-3	-	6273	Polyketide synthase modules and related proteins	- none -
fig|6666666.563250.peg.567	CDS	1	736579	736034	-1	-	546	hypothetical protein Rv0098	- none -
fig|6666666.563250.peg.568	CDS	1	737475	736585	-3	-	891	Alpha-ketoglutarate-dependent taurine dioxygenase (EC 1.14.11.17)	- none -
fig|6666666.563250.peg.569	CDS	1	739112	737538	-2	-	1575	Long-chain-fatty-acid--CoA ligase (EC 6.2.1.3)	Biotin biosynthesis; <br>Fatty acid metabolism cluster
fig|6666666.563250.peg.570	CDS	1	739414	740151	1	+	738	hypothetical protein	- none -
fig|6666666.563250.peg.571	CDS	1	741731	740148	-2	-	1584	Peptidase, S41 family	- none -
fig|6666666.563250.peg.572	CDS	1	742367	741993	-2	-	375	hypothetical protein	- none -
fig|6666666.563250.peg.573	CDS	1	742721	742395	-2	-	327	hypothetical protein	- none -
fig|6666666.563250.peg.574	CDS	1	743098	743358	1	+	261	hypothetical protein	- none -
fig|6666666.563250.peg.575	CDS	1	744083	743526	-2	-	558	hypothetical protein	- none -
fig|6666666.563250.peg.576	CDS	1	744600	744085	-3	-	516	hypothetical protein	- none -
fig|6666666.563250.peg.577	CDS	1	745298	744603	-2	-	696	Peptide chain release factor homolog	Translation termination factors bacterial
fig|6666666.563250.peg.578	CDS	1	746691	745300	-3	-	1392	RNA-2&#39;,3&#39;-PO4:RNA-5&#39;-OH ligase	RNA 3&#39;-terminal phosphate cyclase
fig|6666666.563250.peg.579	CDS	1	747365	746676	-2	-	690	hypothetical protein	- none -
fig|6666666.563250.peg.580	CDS	1	749732	748281	-2	-	1452	hypothetical protein	- none -
fig|6666666.563250.peg.581	CDS	1	750288	750010	-3	-	279	hypothetical protein	- none -
fig|6666666.563250.peg.582	CDS	1	750511	750825	1	+	315	hypothetical protein	- none -
fig|6666666.563250.peg.583	CDS	1	750847	751227	1	+	381	hypothetical protein	- none -
fig|6666666.563250.peg.584	CDS	1	751447	752103	1	+	657	hypothetical protein	- none -
fig|6666666.563250.peg.585	CDS	1	752275	752601	1	+	327	hypothetical protein	- none -
fig|6666666.563250.peg.586	CDS	1	752713	753429	1	+	717	Efflux ABC transporter, ATP-binding protein	- none -
fig|6666666.563250.peg.587	CDS	1	753426	754832	3	+	1407	Efflux ABC transporter, permease protein	- none -
fig|6666666.563250.peg.588	CDS	1	754835	756262	2	+	1428	Efflux ABC transporter, permease protein	- none -
fig|6666666.563250.peg.589	CDS	1	756654	756322	-3	-	333	Single-stranded DNA-binding protein	DNA repair, bacterial; <br>DNA repair, bacterial RecFOR pathway
fig|6666666.563250.peg.590	CDS	1	756985	757170	1	+	186	hypothetical protein	- none -
fig|6666666.563250.peg.591	CDS	1	757311	757892	3	+	582	cAMP-binding proteins - catabolite gene activator and regulatory subunit of cAMP-dependent protein kinases	cAMP signaling in bacteria
fig|6666666.563250.peg.592	CDS	1	758049	758633	3	+	585	NAD(P)H dehydrogenase (quinone) family protein	- none -
fig|6666666.563250.peg.593	CDS	1	759135	758710	-3	-	426	hypothetical protein	- none -
fig|6666666.563250.peg.594	CDS	1	759417	759995	3	+	579	Transcriptional regulator, Xre family	- none -
fig|6666666.563250.peg.595	CDS	1	760796	760104	-2	-	693	Phosphonoacetaldehyde hydrolase	- none -
fig|6666666.563250.peg.596	CDS	1	761946	760789	-3	-	1158	putative secreted oxidoreductase	- none -
fig|6666666.563250.peg.597	CDS	1	763291	761975	-1	-	1317	hypothetical protein	- none -
fig|6666666.563250.peg.598	CDS	1	766025	763647	-2	-	2379	hypothetical protein	- none -
fig|6666666.563250.peg.599	CDS	1	767348	766188	-2	-	1161	Lipid carrier : UDP-N- acetylgalactosaminyltransferase	- none -
fig|6666666.563250.peg.600	CDS	1	767460	767341	-3	-	120	hypothetical protein	- none -
fig|6666666.563250.peg.601	CDS	1	768665	767736	-2	-	930	surface array protein	- none -
fig|6666666.563250.peg.602	CDS	1	770101	768665	-1	-	1437	Probable poly(beta-D-mannuronate) O-acetylase (EC 2.3.1.-)	- none -
fig|6666666.563250.peg.603	CDS	1	770860	770105	-1	-	756	Polysaccharide deacetylase	- none -
fig|6666666.563250.peg.604	CDS	1	771931	770867	-1	-	1065	hypothetical protein	- none -
fig|6666666.563250.peg.605	CDS	1	772976	771972	-2	-	1005	hypothetical protein	- none -
fig|6666666.563250.peg.606	CDS	1	773895	772969	-3	-	927	hypothetical protein	- none -
fig|6666666.563250.peg.607	CDS	1	775057	773915	-1	-	1143	hypothetical protein	- none -
fig|6666666.563250.peg.608	CDS	1	776916	775171	-3	-	1746	hypothetical protein	- none -
fig|6666666.563250.peg.609	CDS	1	778341	776932	-3	-	1410	hypothetical protein	- none -
fig|6666666.563250.peg.610	CDS	1	779438	778344	-2	-	1095	hypothetical protein	- none -
fig|6666666.563250.peg.611	CDS	1	780268	779435	-1	-	834	hypothetical protein	- none -
fig|6666666.563250.peg.612	CDS	1	781764	780322	-3	-	1443	Lipopolysaccharide biosynthesis protein WzxC	- none -
fig|6666666.563250.peg.613	CDS	1	782830	781859	-1	-	972	UDP-2-acetamido-2-deoxy-D-glucuronic acid dehydrogenase (NAD+) (EC 1.1.1.335)	- none -
fig|6666666.563250.peg.614	CDS	1	783420	782836	-3	-	585	UDP-2-acetamido-3-amino-2,3-dideoxy-D-glucuronic acid acetyltransferase (EC 2.3.1.201)	- none -
fig|6666666.563250.peg.615	CDS	1	784018	783446	-1	-	573	hypothetical protein	- none -
fig|6666666.563250.peg.616	CDS	1	784561	784415	-1	-	147	hypothetical protein	- none -
fig|6666666.563250.peg.617	CDS	1	785515	784772	-1	-	744	hypothetical protein	- none -
fig|6666666.563250.peg.618	CDS	1	786519	785890	-3	-	630	Protein PhnA	- none -
fig|6666666.563250.peg.619	CDS	1	787291	786617	-1	-	675	Phosphoglycolate phosphatase (EC 3.1.3.18)	2-phosphoglycolate salvage; <br>Glycolate, glyoxylate interconversions
fig|6666666.563250.peg.620	CDS	1	789581	787518	-2	-	2064	Branched-chain alpha-keto acid dehydrogenase, E1 component, alpha subunit (EC 1.2.4.4) / Branched-chain alpha-keto acid dehydrogenase, E1 component, beta subunit (EC 1.2.4.4)	Dehydrogenase complexes; <br>Dehydrogenase complexes; <br>Isoleucine degradation; <br>Isoleucine degradation; <br>Valine degradation; <br>Valine degradation
fig|6666666.563250.peg.621	CDS	1	790803	789745	-3	-	1059	Branched-chain amino acid aminotransferase (EC 2.6.1.42)	Alanine biosynthesis; <br>Branched-Chain Amino Acid Biosynthesis; <br>Isoleucine degradation; <br>Leucine Biosynthesis; <br>Pyruvate Alanine Serine Interconversions; <br>Valine degradation
fig|6666666.563250.peg.622	CDS	1	792307	791003	-1	-	1305	Dihydrolipoamide acyltransferase component of branched-chain alpha-keto acid dehydrogenase complex (EC 2.3.1.168)	Dehydrogenase complexes; <br>Isoleucine degradation; <br>Valine degradation
fig|6666666.563250.peg.623	CDS	1	793270	792488	-1	-	783	PROBABLE REMNANT OF A TRANSPOSASE GENE PROTEIN	- none -
fig|6666666.563250.peg.624	CDS	1	793902	793303	-3	-	600	Phenylacetic acid degradation protein PaaY	- none -
fig|6666666.563250.peg.625	CDS	1	794713	793961	-1	-	753	Methylglutaconyl-CoA hydratase (EC 4.2.1.18)	- none -
fig|6666666.563250.peg.626	CDS	1	797284	794780	-1	-	2505	3-oxo-5,6-dehydrosuberyl-CoA semialdehyde dehydrogenase (EC 1.2.1.91) / 2-oxepin-2(3H)-ylideneacetyl-CoA hydrolase (EC 3.3.2.12)	- none -
fig|6666666.563250.peg.627	CDS	1	798552	797344	-3	-	1209	3-ketoacyl-CoA thiolase (EC 2.3.1.16) @ Acetyl-CoA acetyltransferase (EC 2.3.1.9)	Acetyl-CoA fermentation to Butyrate; <br>Biotin biosynthesis; <br>Butanol Biosynthesis; <br>Butyrate metabolism cluster; <br>Fatty acid metabolism cluster; <br>Isoleucine degradation; <br>Mevalonate Branch of Isoprenoid Biosynthesis; <br>Polyhydroxybutyrate metabolism; <br>Polyhydroxybutyrate metabolism
fig|6666666.563250.peg.628	CDS	1	799174	798746	-1	-	429	Acyl-coenzyme A thioesterase PaaD (Pse.pu.) (E. coli PaaI)	- none -
fig|6666666.563250.peg.629	CDS	1	799554	799174	-3	-	381	hypothetical protein	- none -
fig|6666666.563250.peg.630	CDS	1	800741	799578	-2	-	1164	3-hydroxybutyryl-CoA dehydrogenase (EC 1.1.1.157); 3-hydroxyacyl-CoA dehydrogenase (EC 1.1.1.35)	Acetyl-CoA fermentation to Butyrate; <br>Acetyl-CoA fermentation to Butyrate; <br>Butanol Biosynthesis; <br>Butyrate metabolism cluster; <br>Fatty acid metabolism cluster; <br>Isoleucine degradation; <br>Polyhydroxybutyrate metabolism; <br>Polyhydroxybutyrate metabolism; <br>Valine degradation
fig|6666666.563250.peg.631	CDS	1	801582	800800	-3	-	783	Enoyl-CoA hydratase (EC 4.2.1.17)	Acetyl-CoA fermentation to Butyrate; <br>Butanol Biosynthesis; <br>Butyrate metabolism cluster; <br>Fatty acid metabolism cluster; <br>Isoleucine degradation; <br>Polyhydroxybutyrate metabolism; <br>Valine degradation
fig|6666666.563250.peg.632	CDS	1	802128	801625	-3	-	504	1,2-phenylacetyl-CoA epoxidase, subunit D (EC 1.14.13.149)	- none -
fig|6666666.563250.peg.633	CDS	1	803013	802258	-3	-	756	1,2-phenylacetyl-CoA epoxidase, subunit C (EC 1.14.13.149)	- none -
fig|6666666.563250.peg.634	CDS	1	803522	803241	-2	-	282	1,2-phenylacetyl-CoA epoxidase, subunit B (EC 1.14.13.149)	- none -
fig|6666666.563250.peg.635	CDS	1	804572	803616	-2	-	957	1,2-phenylacetyl-CoA epoxidase, subunit A (EC 1.14.13.149)	- none -
fig|6666666.563250.peg.636	CDS	1	805749	804676	-3	-	1074	1,2-phenylacetyl-CoA epoxidase, subunit E (EC 1.14.13.149)	- none -
fig|6666666.563250.peg.637	CDS	1	806415	805846	-3	-	570	Transcriptional regulator, AcrR family	- none -
fig|6666666.563250.peg.638	CDS	1	808209	806530	-3	-	1680	hypothetical protein	- none -
fig|6666666.563250.peg.639	CDS	1	808326	810083	3	+	1758	Phenylalanine-4-hydroxylase (EC 1.14.16.1) / N-terminal regulatory domain	Aromatic amino acid degradation; <br>Pterin carbinolamine dehydratase; <br>Pterin metabolism
fig|6666666.563250.peg.640	CDS	1	810346	811524	1	+	1179	hypothetical protein	- none -
fig|6666666.563250.peg.641	CDS	1	812535	811588	-3	-	948	hypothetical protein	- none -
fig|6666666.563250.peg.642	CDS	1	815294	812661	-2	-	2634	Alanyl-tRNA synthetase (EC 6.1.1.7)	CBSS-226186.1.peg.3994; <br>tRNA aminoacylation, Ala
fig|6666666.563250.peg.643	CDS	1	815506	816483	1	+	978	Peptidase, family M23 (EC 3.4.24.-)	CBSS-226186.1.peg.3994
fig|6666666.563250.peg.644	CDS	1	816492	817607	3	+	1116	Capsule biosynthesis protein capA	- none -
fig|6666666.563250.peg.645	CDS	1	817610	817939	2	+	330	Transcriptional regulator, MerR family	Cobalt-zinc-cadmium resistance
fig|6666666.563250.peg.646	CDS	1	817997	818596	2	+	600	LemA family protein	- none -
fig|6666666.563250.peg.647	CDS	1	818599	819036	1	+	438	FIG014338: Hypothetical protein	- none -
fig|6666666.563250.peg.648	CDS	1	819037	819849	1	+	813	Beta-propeller domains of methanol dehydrogenase type	- none -
fig|6666666.563250.peg.649	CDS	1	821253	819946	-3	-	1308	GTP-binding protein EngA	- none -
fig|6666666.563250.peg.650	CDS	1	823078	821552	-1	-	1527	Alkaline phosphatase (EC 3.1.3.1)	Phosphate metabolism; <br>Pterin synthesis related cluster
fig|6666666.563250.peg.651	CDS	1	824154	823270	-3	-	885	GTP-binding protein Era	CBSS-176299.4.peg.1292; <br>Glycyl-tRNA synthetase containing cluster
fig|6666666.563250.peg.652	CDS	1	824354	824761	2	+	408	Two-component response regulator	- none -
fig|6666666.563250.peg.653	CDS	1	824783	825328	2	+	546	Guanylate cyclase-related protein	- none -
fig|6666666.563250.peg.654	CDS	1	825285	826919	3	+	1635	Two-component system sensor histidine kinase	- none -
fig|6666666.563250.peg.655	CDS	1	826922	828022	2	+	1101	hypothetical protein	- none -
fig|6666666.563250.peg.656	CDS	1	828029	829189	2	+	1161	Two-component system sensor histidine kinase	- none -
fig|6666666.563250.peg.657	CDS	1	829182	829502	3	+	321	hypothetical protein	- none -
fig|6666666.563250.peg.658	CDS	1	829516	830241	1	+	726	Two-component transcriptional response regulator, LuxR family	- none -
fig|6666666.563250.peg.659	CDS	1	833611	830258	-1	-	3354	TPR domain protein	- none -
fig|6666666.563250.peg.660	CDS	1	833964	834266	3	+	303	hypothetical protein	- none -
fig|6666666.563250.peg.661	CDS	1	834361	834660	1	+	300	hypothetical protein	- none -
fig|6666666.563250.peg.662	CDS	1	834650	835897	2	+	1248	Capsular polysaccharide biosynthesis protein	- none -
fig|6666666.563250.peg.663	CDS	1	836138	837346	2	+	1209	hypothetical protein	- none -
fig|6666666.563250.peg.664	CDS	1	837517	837386	-1	-	132	hypothetical protein	- none -
fig|6666666.563250.peg.665	CDS	1	839172	837625	-3	-	1548	hypothetical protein	- none -
fig|6666666.563250.peg.666	CDS	1	840477	839236	-3	-	1242	hypothetical protein	- none -
fig|6666666.563250.peg.667	CDS	1	843599	840477	-2	-	3123	hypothetical protein	- none -
fig|6666666.563250.peg.668	CDS	1	843778	844575	1	+	798	Dolichyl phosphate glucosyltransferase	- none -
fig|6666666.563250.peg.669	CDS	1	846036	844660	-3	-	1377	Sodium:alanine symporter	- none -
fig|6666666.563250.peg.670	CDS	1	846568	846104	-1	-	465	FIG00694576: hypothetical protein	- none -
fig|6666666.563250.peg.671	CDS	1	848484	846739	-3	-	1746	hypothetical protein	- none -
fig|6666666.563250.peg.672	CDS	1	849412	848663	-1	-	750	hypothetical protein	- none -
fig|6666666.563250.peg.673	CDS	1	853290	850177	-3	-	3114	Acriflavin resistance protein	Multidrug Resistance Efflux Pumps
fig|6666666.563250.peg.674	CDS	1	854407	853313	-1	-	1095	CzcABC family efflux RND transporter, membrane fusion protein	- none -
fig|6666666.563250.peg.675	CDS	1	856733	854421	-2	-	2313	hypothetical protein	- none -
fig|6666666.563250.peg.676	CDS	1	857200	856787	-1	-	414	hypothetical protein	- none -
fig|6666666.563250.peg.677	CDS	1	858309	857404	-3	-	906	hypothetical protein	- none -
fig|6666666.563250.peg.678	CDS	1	858928	858698	-1	-	231	hypothetical protein	- none -
fig|6666666.563250.peg.679	CDS	1	859097	859210	2	+	114	hypothetical protein	- none -
fig|6666666.563250.peg.680	CDS	1	860497	859868	-1	-	630	hypothetical protein	- none -
fig|6666666.563250.peg.681	CDS	1	860658	860509	-3	-	150	hypothetical protein	- none -
fig|6666666.563250.peg.682	CDS	1	860828	860712	-2	-	117	hypothetical protein	- none -
fig|6666666.563250.peg.683	CDS	1	861937	861209	-1	-	729	hypothetical protein	- none -
fig|6666666.563250.peg.684	CDS	1	862605	861964	-3	-	642	hypothetical protein	- none -
fig|6666666.563250.peg.685	CDS	1	863838	862768	-3	-	1071	hypothetical protein	- none -
fig|6666666.563250.peg.686	CDS	1	863947	865023	1	+	1077	Adenylate cyclase (EC 4.6.1.1)	cAMP signaling in bacteria
fig|6666666.563250.peg.687	CDS	1	867063	865108	-3	-	1956	Outer membrane lipoprotein omp16 precursor	Ton and Tol transport systems
fig|6666666.563250.peg.688	CDS	1	868042	867086	-1	-	957	hypothetical protein	- none -
fig|6666666.563250.peg.689	CDS	1	895735	868250	-1	-	27486	hypothetical protein	- none -
fig|6666666.563250.peg.690	CDS	1	896107	895829	-1	-	279	hypothetical protein	- none -
fig|6666666.563250.peg.691	CDS	1	897631	896801	-1	-	831	hypothetical protein	- none -
fig|6666666.563250.peg.692	CDS	1	898953	897607	-3	-	1347	Sodium/solute symporter	- none -
fig|6666666.563250.peg.693	CDS	1	900470	899043	-2	-	1428	Cell surface glycan-binding lipoprotein, utilization system for glycans and polysaccharides (PUL), SusD family	- none -
fig|6666666.563250.peg.694	CDS	1	903701	900483	-2	-	3219	Outer membrane TonB-dependent transporter, utilization system for glycans and polysaccharides (PUL), SusC family	- none -
fig|6666666.563250.peg.695	CDS	1	904503	903802	-3	-	702	Glycosyltransferase (EC 2.4.1.-)	- none -
fig|6666666.563250.peg.696	CDS	1	904762	904613	-1	-	150	hypothetical protein	- none -
fig|6666666.563250.peg.697	CDS	1	904805	905683	2	+	879	hypothetical protein	- none -
fig|6666666.563250.peg.698	CDS	1	905680	906414	1	+	735	Lyzozyme M1 (1,4-beta-N-acetylmuramidase)	- none -
fig|6666666.563250.peg.699	CDS	1	907823	906525	-2	-	1299	hypothetical protein	- none -
fig|6666666.563250.peg.700	CDS	1	908093	908725	2	+	633	cAMP-binding proteins - catabolite gene activator and regulatory subunit of cAMP-dependent protein kinases	cAMP signaling in bacteria
fig|6666666.563250.peg.701	CDS	1	908808	909329	3	+	522	hypothetical protein	- none -
fig|6666666.563250.peg.702	CDS	1	909343	910482	1	+	1140	Cytochrome c551 peroxidase (EC 1.11.1.5)	- none -
fig|6666666.563250.peg.703	CDS	1	911948	910590	-2	-	1359	Cell surface glycan-binding lipoprotein, utilization system for glycans and polysaccharides (PUL), SusD family	- none -
fig|6666666.563250.peg.704	CDS	1	914976	911962	-3	-	3015	Outer membrane TonB-dependent transporter, utilization system for glycans and polysaccharides (PUL), SusC family	- none -
fig|6666666.563250.peg.705	CDS	1	916805	915312	-2	-	1494	peptidase, M48 family protein( EC:3.4.24.- )	- none -
fig|6666666.563250.peg.706	CDS	1	917944	916805	-1	-	1140	hypothetical protein	- none -
fig|6666666.563250.peg.707	CDS	1	918599	917964	-2	-	636	hypothetical protein	- none -
fig|6666666.563250.peg.708	CDS	1	919053	918643	-3	-	411	hypothetical protein	- none -
fig|6666666.563250.peg.709	CDS	1	919988	919251	-2	-	738	response regulator of the LytR/AlgR family, putative	- none -
fig|6666666.563250.peg.710	CDS	1	921793	919985	-1	-	1809	Autolysin sensor kinase (EC 2.7.3.-)	- none -
fig|6666666.563250.peg.711	CDS	1	922766	922320	-2	-	447	Transcriptional regulator, AraC family	- none -
fig|6666666.563250.peg.712	CDS	1	923584	922838	-1	-	747	Transcriptional regulator, YafY family	- none -
fig|6666666.563250.peg.713	CDS	1	923788	925050	1	+	1263	hypothetical protein	- none -
fig|6666666.563250.peg.714	CDS	1	925225	925953	1	+	729	Repair of Iron Centers di-iron protein	- none -
fig|6666666.563250.peg.715	CDS	1	926038	927258	1	+	1221	hypothetical protein	- none -
fig|6666666.563250.peg.716	CDS	1	927448	927957	1	+	510	hypothetical protein	- none -
fig|6666666.563250.peg.717	CDS	1	928002	928571	3	+	570	Sensory subunit of low CO2-induced protein complex, putative	CO2 uptake, carboxysome
fig|6666666.563250.peg.718	CDS	1	928579	930537	1	+	1959	Nitrous-oxide reductase (EC 1.7.99.6) / Pseudoazurin	Copper transport and blue copper proteins; <br>Denitrification; <br>Denitrifying reductase gene clusters
fig|6666666.563250.peg.719	CDS	1	930715	931314	1	+	600	hypothetical protein	- none -
fig|6666666.563250.peg.720	CDS	1	931330	931770	1	+	441	Nitrous oxide reductase maturation protein, outer-membrane lipoprotein NosL	Denitrification; <br>Denitrifying reductase gene clusters
fig|6666666.563250.peg.721	CDS	1	931770	932207	3	+	438	hypothetical protein	- none -
fig|6666666.563250.peg.722	CDS	1	932228	933499	2	+	1272	Nitrous oxide reductase maturation protein NosD	Denitrification; <br>Denitrifying reductase gene clusters
fig|6666666.563250.peg.723	CDS	1	933496	934203	1	+	708	Nitrous oxide reductase maturation protein NosF (ATPase)	Denitrification; <br>Denitrifying reductase gene clusters
fig|6666666.563250.peg.724	CDS	1	934196	934978	2	+	783	Nitrous oxide reductase maturation transmembrane protein NosY	Denitrification; <br>Denitrifying reductase gene clusters
fig|6666666.563250.peg.725	CDS	1	935040	935435	3	+	396	hypothetical protein	- none -
fig|6666666.563250.peg.726	CDS	1	935636	936481	2	+	846	hypothetical protein	- none -
fig|6666666.563250.peg.727	CDS	1	936672	938681	3	+	2010	TonB-dependent receptor	Ton and Tol transport systems
fig|6666666.563250.peg.728	CDS	1	938828	938685	-2	-	144	hypothetical protein	- none -
fig|6666666.563250.peg.729	CDS	1	938836	939282	1	+	447	Rrf2 family transcriptional regulator	Rrf2 family transcriptional regulators
fig|6666666.563250.peg.730	CDS	1	940298	939291	-2	-	1008	GTP 3&#39;,8-cyclase (EC 4.1.99.22)	- none -
fig|6666666.563250.peg.731	CDS	1	941209	940298	-1	-	912	Cyclic pyranopterin monophosphate synthase (EC 4.6.1.17) / Molybdopterin adenylyltransferase (EC 2.7.7.75)	- none -
fig|6666666.563250.peg.732	CDS	1	941654	941211	-2	-	444	Molybdopterin synthase catalytic subunit MoaE (EC 2.8.1.12)	- none -
fig|6666666.563250.peg.733	CDS	1	941890	941684	-1	-	207	hypothetical protein	- none -
fig|6666666.563250.peg.734	CDS	1	942491	941901	-2	-	591	Molybdenum cofactor guanylyltransferase (EC 2.7.7.77)	- none -
fig|6666666.563250.peg.735	CDS	1	943238	942495	-2	-	744	Uncharacterized UPF0721 integral membrane protein	- none -
fig|6666666.563250.peg.736	CDS	1	943576	943235	-1	-	342	DNA-binding domain of ModE	- none -
fig|6666666.563250.peg.737	CDS	1	944814	943573	-3	-	1242	Molybdopterin molybdenumtransferase (EC 2.10.1.1)	- none -
fig|6666666.563250.peg.738	CDS	1	944968	945585	1	+	618	Cytochrome c nitrite reductase, small subunit NrfH	Nitrate and nitrite ammonification
fig|6666666.563250.peg.739	CDS	1	945578	947068	2	+	1491	Cytochrome c552 precursor (EC 1.7.2.2)	Nitrate and nitrite ammonification; <br>Soluble cytochromes and functionally related electron carriers
fig|6666666.563250.peg.740	CDS	1	947087	948331	2	+	1245	hypothetical protein	- none -
fig|6666666.563250.peg.741	CDS	1	948337	949137	1	+	801	hypothetical protein	- none -
fig|6666666.563250.peg.742	CDS	1	949255	949494	1	+	240	hypothetical protein	- none -
fig|6666666.563250.peg.743	CDS	1	949500	951827	3	+	2328	Periplasmic nitrate reductase (EC 1.7.99.4)	- none -
fig|6666666.563250.peg.744	CDS	1	951955	952647	1	+	693	hypothetical protein	- none -
fig|6666666.563250.peg.745	CDS	1	952637	953266	2	+	630	hypothetical protein	- none -
fig|6666666.563250.peg.746	CDS	1	953307	954380	3	+	1074	Oligo-[4Fe-4S] ferredoxin	- none -
fig|6666666.563250.peg.747	CDS	1	954486	955715	3	+	1230	Similar to sulfite reduction-associated complex DsrMKJOP protein DsrP	- none -
fig|6666666.563250.peg.748	CDS	1	958922	955767	-2	-	3156	hypothetical protein	- none -
fig|6666666.563250.peg.749	CDS	1	959907	959347	-3	-	561	RNA polymerase sigma-70 factor, ECF subfamily	- none -
fig|6666666.563250.peg.750	CDS	1	960803	960138	-2	-	666	hypothetical protein	- none -
fig|6666666.563250.peg.751	CDS	1	962696	960816	-2	-	1881	Sensory box histidine kinase	- none -
fig|6666666.563250.peg.752	CDS	1	964774	962795	-1	-	1980	hypothetical protein	- none -
fig|6666666.563250.peg.753	CDS	1	965007	964804	-3	-	204	hypothetical protein	- none -
fig|6666666.563250.peg.754	CDS	1	966195	965956	-3	-	240	hypothetical protein	- none -
fig|6666666.563250.peg.755	CDS	1	969176	967218	-2	-	1959	hypothetical protein	- none -
fig|6666666.563250.peg.756	CDS	1	970141	969629	-1	-	513	hypothetical protein	- none -
fig|6666666.563250.peg.757	CDS	1	970825	970151	-1	-	675	hypothetical protein	- none -
fig|6666666.563250.peg.758	CDS	1	971532	970858	-3	-	675	hypothetical protein	- none -
fig|6666666.563250.peg.759	CDS	1	972520	971561	-1	-	960	hypothetical protein	- none -
fig|6666666.563250.peg.760	CDS	1	973220	972525	-2	-	696	hypothetical protein	- none -
fig|6666666.563250.peg.761	CDS	1	973788	973228	-3	-	561	hypothetical protein	- none -
fig|6666666.563250.peg.762	CDS	1	974308	973799	-1	-	510	hypothetical protein	- none -
fig|6666666.563250.peg.763	CDS	1	974972	974313	-2	-	660	hypothetical protein	- none -
fig|6666666.563250.peg.764	CDS	1	975489	975184	-3	-	306	hypothetical protein	- none -
fig|6666666.563250.peg.765	CDS	1	975805	975494	-1	-	312	hypothetical protein	- none -
fig|6666666.563250.peg.766	CDS	1	976367	975792	-2	-	576	hypothetical protein	- none -
fig|6666666.563250.peg.767	CDS	1	976603	976364	-1	-	240	hypothetical protein	- none -
fig|6666666.563250.peg.768	CDS	1	976923	976600	-3	-	324	hypothetical protein	- none -
fig|6666666.563250.peg.769	CDS	1	977439	976933	-3	-	507	hypothetical protein	- none -
fig|6666666.563250.peg.770	CDS	1	978003	977452	-3	-	552	hypothetical protein	- none -
fig|6666666.563250.peg.771	CDS	1	978311	978006	-2	-	306	hypothetical protein	- none -
fig|6666666.563250.peg.772	CDS	1	979344	978304	-3	-	1041	hypothetical protein	- none -
fig|6666666.563250.peg.773	CDS	1	979749	979369	-3	-	381	hypothetical protein	- none -
fig|6666666.563250.peg.774	CDS	1	980378	979767	-2	-	612	hypothetical protein	- none -
fig|6666666.563250.peg.775	CDS	1	980802	980371	-3	-	432	hypothetical protein	- none -
fig|6666666.563250.peg.776	CDS	1	981318	980812	-3	-	507	COG0705: Uncharacterized membrane protein (homolog of Drosophila rhomboid)	- none -
fig|6666666.563250.peg.777	CDS	1	981861	981355	-3	-	507	hypothetical protein	- none -
fig|6666666.563250.peg.778	CDS	1	982256	981858	-2	-	399	hypothetical protein	- none -
fig|6666666.563250.peg.779	CDS	1	983156	982359	-2	-	798	hypothetical protein	- none -
fig|6666666.563250.peg.780	CDS	1	985376	983319	-2	-	2058	hypothetical protein	- none -
fig|6666666.563250.peg.781	CDS	1	986223	985504	-3	-	720	Internalin A (LPXTG motif)	- none -
fig|6666666.563250.peg.782	CDS	1	986665	986405	-1	-	261	hypothetical protein	- none -
fig|6666666.563250.peg.783	CDS	1	988744	986690	-1	-	2055	hypothetical protein	- none -
fig|6666666.563250.peg.784	CDS	1	989204	988752	-2	-	453	hypothetical protein	- none -
fig|6666666.563250.peg.785	CDS	1	989674	989240	-1	-	435	hypothetical protein	- none -
fig|6666666.563250.peg.786	CDS	1	989924	989808	-2	-	117	hypothetical protein	- none -
fig|6666666.563250.peg.787	CDS	1	990277	989927	-1	-	351	hypothetical protein	- none -
fig|6666666.563250.peg.788	CDS	1	990768	990301	-3	-	468	hypothetical protein	- none -
fig|6666666.563250.peg.789	CDS	1	991061	990768	-2	-	294	hypothetical protein	- none -
fig|6666666.563250.peg.790	CDS	1	991763	991080	-2	-	684	hypothetical protein	- none -
fig|6666666.563250.peg.791	CDS	1	992524	991793	-1	-	732	hypothetical protein	- none -
fig|6666666.563250.peg.792	CDS	1	993795	992521	-3	-	1275	hypothetical protein	- none -
fig|6666666.563250.peg.793	CDS	1	994213	993857	-1	-	357	hypothetical protein	- none -
fig|6666666.563250.peg.794	CDS	1	994580	994236	-2	-	345	hypothetical protein	- none -
fig|6666666.563250.peg.795	CDS	1	995229	994843	-3	-	387	hypothetical protein	- none -
fig|6666666.563250.peg.796	CDS	1	995836	995270	-1	-	567	hypothetical protein	- none -
fig|6666666.563250.peg.797	CDS	1	996710	995973	-2	-	738	response regulator of the LytR/AlgR family, putative	- none -
fig|6666666.563250.peg.798	CDS	1	998902	996707	-1	-	2196	Two-component system sensor histidine kinase	- none -
fig|6666666.563250.peg.799	CDS	1	1000503	999373	-3	-	1131	Type IV fimbrial assembly protein PilC	- none -
fig|6666666.563250.peg.800	CDS	1	1000971	1000507	-3	-	465	hypothetical protein	- none -
fig|6666666.563250.peg.801	CDS	1	1001282	1000968	-2	-	315	hypothetical protein	- none -
fig|6666666.563250.peg.802	CDS	1	1002514	1001270	-1	-	1245	hypothetical protein	- none -
fig|6666666.563250.peg.803	CDS	1	1003011	1002544	-3	-	468	hypothetical protein	- none -
fig|6666666.563250.peg.804	CDS	1	1003947	1003018	-3	-	930	hypothetical protein	- none -
fig|6666666.563250.peg.805	CDS	1	1004600	1003950	-2	-	651	hypothetical protein	- none -
fig|6666666.563250.peg.806	CDS	1	1005230	1004712	-2	-	519	hypothetical protein	- none -
fig|6666666.563250.peg.807	CDS	1	1006425	1005214	-3	-	1212	hypothetical protein	- none -
fig|6666666.563250.peg.808	CDS	1	1008605	1006425	-2	-	2181	Type IV pilus biogenesis protein PilQ	- none -
fig|6666666.563250.peg.809	CDS	1	1010089	1008671	-1	-	1419	Type IV fimbrial assembly, ATPase PilB	- none -
fig|6666666.563250.peg.810	CDS	1	1010568	1010086	-3	-	483	hypothetical protein	- none -
fig|6666666.563250.peg.811	CDS	1	1010978	1010568	-2	-	411	Type IV pilin PilA	- none -
fig|6666666.563250.peg.812	CDS	1	1021359	1011592	-3	-	9768	hypothetical protein	- none -
fig|6666666.563250.peg.813	CDS	1	1022181	1022768	3	+	588	hypothetical protein	- none -
fig|6666666.563250.peg.814	CDS	1	1022771	1024282	2	+	1512	Type I restriction-modification system, DNA-methyltransferase subunit M (EC 2.1.1.72)	Restriction-Modification System; <br>Type I Restriction-Modification
fig|6666666.563250.peg.815	CDS	1	1024308	1024727	3	+	420	hypothetical protein	- none -
fig|6666666.563250.peg.816	CDS	1	1024755	1026029	3	+	1275	hypothetical protein	- none -
fig|6666666.563250.peg.817	CDS	1	1026029	1027336	2	+	1308	Type I restriction-modification system, specificity subunit S	- none -
fig|6666666.563250.peg.818	CDS	1	1027396	1027632	1	+	237	hypothetical protein	- none -
fig|6666666.563250.peg.819	CDS	1	1027629	1030634	3	+	3006	hypothetical protein	- none -
fig|6666666.563250.peg.820	CDS	1	1030606	1033752	1	+	3147	Type I restriction-modification system, restriction subunit R (EC 3.1.21.3)	Restriction-Modification System; <br>Type I Restriction-Modification
fig|6666666.563250.peg.821	CDS	1	1033752	1034453	3	+	702	Putative predicted metal-dependent hydrolase	Restriction-Modification System
fig|6666666.563250.peg.822	CDS	1	1034497	1035402	1	+	906	Uncharacterized protein BT_4536	- none -
fig|6666666.563250.peg.823	CDS	1	1036400	1036284	-2	-	117	Mobile element protein	- none -
fig|6666666.563250.peg.824	CDS	1	1036867	1037787	1	+	921	hypothetical protein	- none -
fig|6666666.563250.peg.825	CDS	1	1037788	1038318	1	+	531	hypothetical protein	- none -
fig|6666666.563250.peg.826	CDS	1	1039695	1038415	-3	-	1281	Retron-type RNA-directed DNA polymerase (EC 2.7.7.49)	Group II intron-associated genes
fig|6666666.563250.peg.827	CDS	1	1040349	1041386	3	+	1038	hypothetical protein	- none -
fig|6666666.563250.peg.828	CDS	1	1042756	1041476	-1	-	1281	Retron-type RNA-directed DNA polymerase (EC 2.7.7.49)	Group II intron-associated genes
fig|6666666.563250.peg.829	CDS	1	1043470	1044597	1	+	1128	hypothetical protein	- none -
fig|6666666.563250.peg.830	CDS	1	1045967	1044687	-2	-	1281	Retron-type RNA-directed DNA polymerase (EC 2.7.7.49)	Group II intron-associated genes
fig|6666666.563250.peg.831	CDS	1	1046607	1047236	3	+	630	hypothetical protein	- none -
fig|6666666.563250.peg.832	CDS	1	1047455	1047321	-2	-	135	hypothetical protein	- none -
fig|6666666.563250.peg.833	CDS	1	1047669	1048097	3	+	429	hypothetical protein	- none -
fig|6666666.563250.peg.834	CDS	1	1048288	1048794	1	+	507	hypothetical protein	- none -
fig|6666666.563250.peg.835	CDS	1	1050455	1048911	-2	-	1545	Transposase	- none -
fig|6666666.563250.peg.836	CDS	1	1050714	1051235	3	+	522	hypothetical protein	- none -
fig|6666666.563250.peg.837	CDS	1	1051633	1052373	1	+	741	hypothetical protein	- none -
fig|6666666.563250.peg.838	CDS	1	1052614	1052399	-1	-	216	hypothetical protein	- none -
fig|6666666.563250.peg.839	CDS	1	1053154	1052621	-1	-	534	hypothetical protein	- none -
fig|6666666.563250.peg.840	CDS	1	1053666	1053166	-3	-	501	hypothetical protein	- none -
fig|6666666.563250.peg.841	CDS	1	1053799	1053653	-1	-	147	hypothetical protein	- none -
fig|6666666.563250.peg.842	CDS	1	1054578	1053955	-3	-	624	Flagellar protein FlgJ [peptidoglycan hydrolase]	- none -
fig|6666666.563250.peg.843	CDS	1	1055383	1054589	-1	-	795	hypothetical protein	- none -
fig|6666666.563250.peg.844	CDS	1	1055514	1055398	-3	-	117	hypothetical protein	- none -
fig|6666666.563250.peg.845	CDS	1	1056082	1055729	-1	-	354	hypothetical protein	- none -
fig|6666666.563250.peg.846	CDS	1	1056423	1056079	-3	-	345	hypothetical protein	- none -
fig|6666666.563250.peg.847	CDS	1	1056670	1056428	-1	-	243	hypothetical protein	- none -
fig|6666666.563250.peg.848	CDS	1	1057104	1056676	-3	-	429	hypothetical protein	- none -
fig|6666666.563250.peg.849	CDS	1	1057586	1057101	-2	-	486	hypothetical protein	- none -
fig|6666666.563250.peg.850	CDS	1	1058155	1057625	-1	-	531	hypothetical protein	- none -
fig|6666666.563250.peg.851	CDS	1	1058660	1058166	-2	-	495	hypothetical protein	- none -
fig|6666666.563250.peg.852	CDS	1	1059115	1058657	-1	-	459	hypothetical protein	- none -
fig|6666666.563250.peg.853	CDS	1	1059374	1059126	-2	-	249	hypothetical protein	- none -
fig|6666666.563250.peg.854	CDS	1	1059975	1059496	-3	-	480	Cell wall-associated hydrolases (invasion-associated proteins)	- none -
fig|6666666.563250.peg.855	CDS	1	1061711	1059990	-2	-	1722	hypothetical protein	- none -
fig|6666666.563250.peg.856	CDS	1	1062463	1061708	-1	-	756	hypothetical protein	- none -
fig|6666666.563250.peg.857	CDS	1	1062950	1062468	-2	-	483	hypothetical protein	- none -
fig|6666666.563250.peg.858	CDS	1	1063202	1062975	-2	-	228	hypothetical protein	- none -
fig|6666666.563250.peg.859	CDS	1	1063986	1063186	-3	-	801	hypothetical protein	- none -
fig|6666666.563250.peg.860	CDS	1	1064775	1064011	-3	-	765	hypothetical protein	- none -
fig|6666666.563250.peg.861	CDS	1	1065445	1064798	-1	-	648	hypothetical protein	- none -
fig|6666666.563250.peg.862	CDS	1	1066465	1065554	-1	-	912	hypothetical protein	- none -
fig|6666666.563250.peg.863	CDS	1	1066746	1066576	-3	-	171	hypothetical protein	- none -
fig|6666666.563250.peg.864	CDS	1	1067065	1067445	1	+	381	hypothetical protein	- none -
fig|6666666.563250.peg.865	CDS	1	1068049	1067471	-1	-	579	hypothetical protein	- none -
fig|6666666.563250.peg.866	CDS	1	1068987	1068049	-3	-	939	hypothetical protein	- none -
fig|6666666.563250.peg.867	CDS	1	1069709	1068990	-2	-	720	hypothetical protein	- none -
fig|6666666.563250.peg.868	CDS	1	1069763	1069882	2	+	120	hypothetical protein	- none -
fig|6666666.563250.peg.869	CDS	1	1070200	1070427	1	+	228	hypothetical protein	- none -
fig|6666666.563250.peg.870	CDS	1	1070450	1071238	2	+	789	hypothetical protein	- none -
fig|6666666.563250.peg.871	CDS	1	1071254	1071451	2	+	198	hypothetical protein	- none -
fig|6666666.563250.peg.872	CDS	1	1071891	1071457	-3	-	435	hypothetical protein	- none -
fig|6666666.563250.peg.873	CDS	1	1072121	1072372	2	+	252	hypothetical protein	- none -
fig|6666666.563250.peg.874	CDS	1	1072362	1072814	3	+	453	hypothetical protein	- none -
fig|6666666.563250.peg.875	CDS	1	1072924	1073124	1	+	201	hypothetical protein	- none -
fig|6666666.563250.peg.876	CDS	1	1073121	1073351	3	+	231	hypothetical protein	- none -
fig|6666666.563250.peg.877	CDS	1	1073524	1074210	1	+	687	hypothetical protein	- none -
fig|6666666.563250.peg.878	CDS	1	1074387	1077656	3	+	3270	hypothetical protein	- none -
fig|6666666.563250.peg.879	CDS	1	1077659	1083085	2	+	5427	hypothetical protein	- none -
fig|6666666.563250.peg.880	CDS	1	1083088	1083474	1	+	387	hypothetical protein	- none -
fig|6666666.563250.peg.881	CDS	1	1083498	1084034	3	+	537	hypothetical protein	- none -
fig|6666666.563250.peg.882	CDS	1	1084240	1084980	1	+	741	hypothetical protein	- none -
fig|6666666.563250.peg.883	CDS	1	1085003	1088314	2	+	3312	hypothetical protein	- none -
fig|6666666.563250.peg.884	CDS	1	1088305	1089063	1	+	759	hypothetical protein	- none -
fig|6666666.563250.peg.885	CDS	1	1089220	1089798	1	+	579	hypothetical protein	- none -
fig|6666666.563250.peg.886	CDS	1	1089833	1090537	2	+	705	hypothetical protein	- none -
fig|6666666.563250.peg.887	CDS	1	1090560	1091144	3	+	585	hypothetical protein	- none -
fig|6666666.563250.peg.888	CDS	1	1091385	1091215	-3	-	171	hypothetical protein	- none -
fig|6666666.563250.peg.889	CDS	1	1092185	1091397	-2	-	789	hypothetical protein	- none -
fig|6666666.563250.peg.890	CDS	1	1093314	1092355	-3	-	960	hypothetical protein	- none -
fig|6666666.563250.peg.891	CDS	1	1093776	1093321	-3	-	456	hypothetical protein	- none -
fig|6666666.563250.peg.892	CDS	1	1094295	1093807	-3	-	489	hypothetical protein	- none -
fig|6666666.563250.peg.893	CDS	1	1094573	1094325	-2	-	249	hypothetical protein	- none -
fig|6666666.563250.peg.894	CDS	1	1095231	1094596	-3	-	636	Transcriptional regulator, TetR family	- none -
fig|6666666.563250.peg.895	CDS	1	1095607	1095248	-1	-	360	hypothetical protein	- none -
fig|6666666.563250.peg.896	CDS	1	1095943	1095611	-1	-	333	hypothetical protein	- none -
fig|6666666.563250.peg.897	CDS	1	1096959	1095940	-3	-	1020	hypothetical protein	- none -
fig|6666666.563250.peg.898	CDS	1	1097925	1096969	-3	-	957	hypothetical protein	- none -
fig|6666666.563250.peg.899	CDS	1	1102242	1097956	-3	-	4287	hypothetical protein	- none -
fig|6666666.563250.peg.900	CDS	1	1102699	1102301	-1	-	399	hypothetical protein	- none -
fig|6666666.563250.peg.901	CDS	1	1106715	1102720	-3	-	3996	hypothetical protein	- none -
fig|6666666.563250.peg.902	CDS	1	1108065	1107853	-3	-	213	hypothetical protein	- none -
fig|6666666.563250.peg.903	CDS	1	1108414	1108118	-1	-	297	hypothetical protein	- none -
fig|6666666.563250.peg.904	CDS	1	1109077	1108478	-1	-	600	hypothetical protein	- none -
fig|6666666.563250.peg.905	CDS	1	1109732	1110829	2	+	1098	hypothetical protein	- none -
fig|6666666.563250.peg.906	CDS	1	1112074	1110878	-1	-	1197	hypothetical protein	- none -
fig|6666666.563250.peg.907	CDS	1	1112373	1112074	-3	-	300	hypothetical protein	- none -
fig|6666666.563250.peg.908	CDS	1	1112861	1112370	-2	-	492	hypothetical protein	- none -
fig|6666666.563250.peg.909	CDS	1	1114235	1112880	-2	-	1356	hypothetical protein	- none -
fig|6666666.563250.peg.910	CDS	1	1114474	1114340	-1	-	135	hypothetical protein	- none -
fig|6666666.563250.peg.911	CDS	1	1114784	1114488	-2	-	297	hypothetical protein	- none -
fig|6666666.563250.peg.912	CDS	1	1115044	1115550	1	+	507	hypothetical protein	- none -
fig|6666666.563250.peg.913	CDS	1	1115714	1116481	2	+	768	hypothetical protein	- none -
fig|6666666.563250.peg.914	CDS	1	1116578	1116937	2	+	360	hypothetical protein	- none -
fig|6666666.563250.peg.915	CDS	1	1116965	1118335	2	+	1371	hypothetical protein	- none -
fig|6666666.563250.peg.916	CDS	1	1118971	1118723	-1	-	249	Transglycosylase associated protein	- none -
fig|6666666.563250.peg.917	CDS	1	1119250	1120200	1	+	951	hypothetical protein	- none -
fig|6666666.563250.peg.918	CDS	1	1120737	1120258	-3	-	480	hypothetical protein	- none -
fig|6666666.563250.peg.919	CDS	1	1121732	1120743	-2	-	990	hypothetical protein	- none -
fig|6666666.563250.peg.920	CDS	1	1122219	1121692	-3	-	528	hypothetical protein	- none -
fig|6666666.563250.peg.921	CDS	1	1123405	1122212	-1	-	1194	hypothetical protein	- none -
fig|6666666.563250.peg.922	CDS	1	1125315	1123405	-3	-	1911	hypothetical protein	- none -
fig|6666666.563250.peg.923	CDS	1	1126748	1125318	-2	-	1431	Type IV fimbrial assembly, ATPase PilB	- none -
fig|6666666.563250.peg.924	CDS	1	1127245	1126745	-1	-	501	hypothetical protein	- none -
fig|6666666.563250.peg.925	CDS	1	1127670	1127245	-3	-	426	Type IV pilin PilA	- none -
fig|6666666.563250.peg.926	CDS	1	1128916	1127780	-1	-	1137	Type IV fimbrial assembly protein PilC	- none -
fig|6666666.563250.peg.927	CDS	1	1129386	1128916	-3	-	471	hypothetical protein	- none -
fig|6666666.563250.peg.928	CDS	1	1129579	1129373	-1	-	207	hypothetical protein	- none -
fig|6666666.563250.peg.929	CDS	1	1130951	1129716	-2	-	1236	hypothetical protein	- none -
fig|6666666.563250.peg.930	CDS	1	1131649	1130951	-1	-	699	hypothetical protein	- none -
fig|6666666.563250.peg.931	CDS	1	1132276	1131683	-1	-	594	hypothetical protein	- none -
fig|6666666.563250.peg.932	CDS	1	1132674	1132552	-3	-	123	hypothetical protein	- none -
fig|6666666.563250.peg.933	CDS	1	1132886	1133035	2	+	150	Methyl-accepting chemotaxis protein	- none -
fig|6666666.563250.peg.934	CDS	1	1133054	1133152	2	+	99	Methyl-accepting chemotaxis protein	- none -
fig|6666666.563250.peg.935	CDS	1	1133541	1133419	-3	-	123	hypothetical protein	- none -
fig|6666666.563250.peg.936	CDS	1	1133559	1133672	3	+	114	transcriptional regulator, XRE family	- none -
fig|6666666.563250.peg.937	CDS	1	1134533	1134009	-2	-	525	hypothetical protein	- none -
fig|6666666.563250.peg.938	CDS	1	1144950	1134535	-3	-	10416	hypothetical protein	- none -
fig|6666666.563250.peg.939	CDS	1	1145685	1144963	-3	-	723	hypothetical protein	- none -
fig|6666666.563250.peg.940	CDS	1	1155223	1145762	-1	-	9462	hypothetical protein	- none -
fig|6666666.563250.peg.941	CDS	1	1161529	1155272	-1	-	6258	hypothetical protein	- none -
fig|6666666.563250.peg.942	CDS	1	1161802	1161972	1	+	171	hypothetical protein	- none -
fig|6666666.563250.peg.943	CDS	1	1162048	1162242	1	+	195	hypothetical protein	- none -
fig|6666666.563250.peg.944	CDS	1	1162298	1163257	2	+	960	hypothetical protein	- none -
fig|6666666.563250.peg.945	CDS	1	1163247	1163468	3	+	222	hypothetical protein	- none -
fig|6666666.563250.peg.946	CDS	1	1163468	1164463	2	+	996	hypothetical protein	- none -
fig|6666666.563250.peg.947	CDS	1	1166421	1164766	-3	-	1656	ABC-type siderophore export system, fused ATPase and permease components	- none -
fig|6666666.563250.peg.948	CDS	1	1187647	1166432	-1	-	21216	Polyketide synthase modules and related proteins	- none -
fig|6666666.563250.peg.949	CDS	1	1188318	1188617	3	+	300	Mobile element protein	- none -
fig|6666666.563250.peg.950	CDS	1	1188651	1188794	3	+	144	hypothetical protein	- none -
fig|6666666.563250.peg.951	CDS	1	1189377	1190375	3	+	999	Phosphatidylinositol-specific phospholipase C (EC 4.6.1.13)	Listeria Pathogenicity Island LIPI-1 extended
fig|6666666.563250.peg.952	CDS	1	1190711	1192084	2	+	1374	Phosphatidylinositol-specific phospholipase C (EC 4.6.1.13)	Listeria Pathogenicity Island LIPI-1 extended
fig|6666666.563250.peg.953	CDS	1	1192335	1192772	3	+	438	hypothetical protein	- none -
fig|6666666.563250.peg.954	CDS	1	1193287	1193105	-1	-	183	Uncharacterized protein Pfl_4718	- none -
fig|6666666.563250.peg.955	CDS	1	1195324	1193408	-1	-	1917	Bis-ABC ATPase YheS	- none -
fig|6666666.563250.peg.956	CDS	1	1195382	1195756	2	+	375	hypothetical protein	- none -
fig|6666666.563250.peg.957	CDS	1	1196903	1195866	-2	-	1038	FAD-dependent cmnm(5)s(2)U34 oxidoreductase	- none -
fig|6666666.563250.peg.958	CDS	1	1197864	1196974	-3	-	891	GldN	- none -
fig|6666666.563250.peg.959	CDS	1	1199423	1197879	-2	-	1545	hypothetical protein	- none -
fig|6666666.563250.peg.960	CDS	1	1200128	1199493	-2	-	636	FIG00553214: hypothetical protein	- none -
fig|6666666.563250.peg.961	CDS	1	1201578	1200205	-3	-	1374	GldJ	- none -
fig|6666666.563250.peg.962	CDS	1	1202854	1201691	-1	-	1164	hypothetical protein	- none -
fig|6666666.563250.peg.963	CDS	1	1205365	1202861	-1	-	2505	DNA topoisomerase I (EC 5.99.1.2)	CBSS-272943.3.peg.1367; <br>DNA topoisomerases, Type I, ATP-independent
fig|6666666.563250.peg.964	CDS	1	1206249	1205458	-3	-	792	hypothetical protein	- none -
fig|6666666.563250.peg.965	CDS	1	1206388	1207833	1	+	1446	tRNA-i(6)A37 methylthiotransferase (EC 2.8.4.3)	- none -
fig|6666666.563250.peg.966	CDS	1	1207859	1209118	2	+	1260	Transcriptional regulator	- none -
fig|6666666.563250.peg.967	CDS	1	1209160	1209666	1	+	507	hypothetical protein	- none -
fig|6666666.563250.peg.968	CDS	1	1209679	1210731	1	+	1053	hypothetical protein	- none -
fig|6666666.563250.peg.969	CDS	1	1210739	1211065	2	+	327	Protein translocase membrane subunit SecG	- none -
fig|6666666.563250.peg.970	CDS	1	1211223	1211498	3	+	276	Heat shock protein 10 kDa family chaperone GroES	- none -
fig|6666666.563250.peg.971	CDS	1	1211614	1213254	1	+	1641	Heat shock protein 60 kDa family chaperone GroEL	- none -
fig|6666666.563250.peg.972	CDS	1	1214140	1213376	-1	-	765	hypothetical protein	- none -
fig|6666666.563250.peg.973	CDS	1	1214194	1214316	1	+	123	hypothetical protein	- none -
fig|6666666.563250.peg.974	CDS	1	1214505	1214323	-3	-	183	hypothetical protein	- none -
fig|6666666.563250.peg.975	CDS	1	1214861	1214980	2	+	120	hypothetical protein	- none -
fig|6666666.563250.peg.976	CDS	1	1216031	1215279	-2	-	753	D-alanyl-D-alanine dipeptidase (EC 3.4.13.22)	- none -
fig|6666666.563250.peg.977	CDS	1	1217952	1216237	-3	-	1716	CzcABC family efflux RND transporter, membrane fusion protein	- none -
fig|6666666.563250.peg.978	CDS	1	1220504	1218015	-2	-	2490	Lead, cadmium, zinc and mercury transporting ATPase (EC 3.6.3.3) (EC 3.6.3.5); Copper-translocating P-type ATPase (EC 3.6.3.4)	Copper Transport System; <br>Copper homeostasis
fig|6666666.563250.peg.979	CDS	1	1221067	1220501	-1	-	567	CzcABC family efflux RND transporter, membrane fusion protein	- none -
fig|6666666.563250.peg.980	CDS	1	1222406	1221144	-2	-	1263	Efflux transport system, outer membrane factor (OMF) lipoprotein	- none -
fig|6666666.563250.peg.981	CDS	1	1226140	1222415	-1	-	3726	CzcABC family efflux RND transporter, transmembrane protein	- none -
fig|6666666.563250.peg.982	CDS	1	1226679	1226260	-3	-	420	FIG00552689: hypothetical protein	- none -
fig|6666666.563250.peg.983	CDS	1	1226817	1227272	3	+	456	GAF domain-containing proteins	- none -
fig|6666666.563250.peg.984	CDS	1	1227321	1228337	3	+	1017	UDP-glucose 4-epimerase (EC 5.1.3.2)	N-linked Glycosylation in Bacteria; <br>Rhamnose containing glycans
fig|6666666.563250.peg.985	CDS	1	1230543	1228423	-3	-	2121	Peptidyl-prolyl cis-trans isomerase (EC 5.2.1.8)	- none -
fig|6666666.563250.peg.986	CDS	1	1231369	1230671	-1	-	699	hypothetical protein	- none -
fig|6666666.563250.peg.987	CDS	1	1232765	1231497	-2	-	1269	Hemolysins and related proteins containing CBS domains	- none -
fig|6666666.563250.peg.988	CDS	1	1232966	1232769	-2	-	198	hypothetical protein	- none -
fig|6666666.563250.peg.989	CDS	1	1233530	1232973	-2	-	558	FIG00649340: hypothetical protein	- none -
fig|6666666.563250.peg.990	CDS	1	1234885	1233530	-1	-	1356	TPR domain protein	- none -
fig|6666666.563250.peg.991	CDS	1	1236159	1234918	-3	-	1242	Putative outer membrane protein	- none -
fig|6666666.563250.peg.992	CDS	1	1236887	1236156	-2	-	732	Pantothenate kinase type III, CoaX-like (EC 2.7.1.33)	Coenzyme A Biosynthesis; <br>Coenzyme A Biosynthesis cluster
fig|6666666.563250.peg.993	CDS	1	1237081	1237203	1	+	123	hypothetical protein	- none -
fig|6666666.563250.peg.994	CDS	1	1238105	1237230	-2	-	876	Fatty acid hydroxylase family (carotene hydroxylase/sterol desaturase)	- none -
fig|6666666.563250.peg.995	CDS	1	1238643	1238521	-3	-	123	hypothetical protein	- none -
fig|6666666.563250.peg.996	CDS	1	1238750	1239259	2	+	510	Peptide-methionine (R)-S-oxide reductase MsrB (EC 1.8.4.12)	- none -
fig|6666666.563250.peg.997	CDS	1	1239252	1239794	3	+	543	Peptide-methionine (S)-S-oxide reductase MsrA (EC 1.8.4.11)	- none -
fig|6666666.563250.peg.998	CDS	1	1239888	1241462	3	+	1575	UPF0061 protein YdiU	- none -
fig|6666666.563250.peg.999	CDS	1	1241472	1242011	3	+	540	Peptide-methionine (S)-S-oxide reductase MsrA (EC 1.8.4.11)	- none -
fig|6666666.563250.peg.1000	CDS	1	1243413	1242031	-3	-	1383	Cell surface glycan-binding lipoprotein, utilization system for glycans and polysaccharides (PUL), SusD family	- none -
fig|6666666.563250.peg.1001	CDS	1	1246772	1243428	-2	-	3345	Outer membrane TonB-dependent transporter, utilization system for glycans and polysaccharides (PUL), SusC family	- none -
fig|6666666.563250.peg.1002	CDS	1	1248061	1246907	-1	-	1155	putative anti-sigma factor	- none -
fig|6666666.563250.peg.1003	CDS	1	1248152	1248712	2	+	561	RNA polymerase ECF-type sigma factor	- none -
fig|6666666.563250.peg.1004	CDS	1	1248896	1249732	2	+	837	Phosphoesterase, PA-phosphatase related	- none -
fig|6666666.563250.peg.1005	CDS	1	1251415	1249745	-1	-	1671	Aerobic glycerol-3-phosphate dehydrogenase (EC 1.1.5.3)	Respiratory dehydrogenases 1
fig|6666666.563250.peg.1006	CDS	1	1251649	1251984	1	+	336	Carboxymuconolactone decarboxylase (EC 4.1.1.44)	- none -
fig|6666666.563250.peg.1007	CDS	1	1252028	1253080	2	+	1053	Radical SAM	- none -
fig|6666666.563250.peg.1008	CDS	1	1253092	1253592	1	+	501	Rhodanese-like domain protein	- none -
fig|6666666.563250.peg.1009	CDS	1	1253595	1254212	3	+	618	Glycosyltransferase	- none -
fig|6666666.563250.peg.1010	CDS	1	1254209	1255021	2	+	813	Purine nucleoside phosphorylase (EC 2.4.2.1)	Adenosyl nucleosidases; <br>Deoxyribose and Deoxynucleoside Catabolism; <br>Purine conversions; <br>pyrimidine conversions
fig|6666666.563250.peg.1011	CDS	1	1255078	1256049	1	+	972	SAM-dependent methyltransferase DSY4148 (UbiE paralog)	- none -
fig|6666666.563250.peg.1012	CDS	1	1256218	1257240	1	+	1023	Probable low-affinity inorganic phosphate transporter	Phosphate metabolism
fig|6666666.563250.peg.1013	CDS	1	1258533	1257352	-3	-	1182	hypothetical protein	- none -
fig|6666666.563250.peg.1014	CDS	1	1259558	1258530	-2	-	1029	hypothetical protein	- none -
fig|6666666.563250.peg.1015	CDS	1	1259875	1259555	-1	-	321	hypothetical protein	- none -
fig|6666666.563250.peg.1016	CDS	1	1261138	1259879	-1	-	1260	hypothetical protein	- none -
fig|6666666.563250.peg.1017	CDS	1	1262573	1261212	-2	-	1362	hypothetical protein	- none -
fig|6666666.563250.peg.1018	CDS	1	1262894	1263934	2	+	1041	hypothetical protein	- none -
fig|6666666.563250.peg.1019	CDS	1	1264238	1263918	-2	-	321	hypothetical protein	- none -
fig|6666666.563250.peg.1020	CDS	1	1264506	1265411	3	+	906	Fatty acid hydroxylase family (carotene hydroxylase/sterol desaturase)	- none -
fig|6666666.563250.peg.1021	CDS	1	1265398	1266111	1	+	714	Uncharacterized protein DUF547	- none -
fig|6666666.563250.peg.1022	CDS	1	1266144	1266857	3	+	714	Glycosyl transferase	- none -
fig|6666666.563250.peg.1023	CDS	1	1268104	1266854	-1	-	1251	hypothetical protein	- none -
fig|6666666.563250.peg.1024	CDS	1	1268862	1268110	-3	-	753	FIG00652002: hypothetical protein	- none -
fig|6666666.563250.peg.1025	CDS	1	1269922	1268918	-1	-	1005	hypothetical protein	- none -
fig|6666666.563250.peg.1026	CDS	1	1270915	1270043	-1	-	873	FIG00649514: hypothetical protein	- none -
fig|6666666.563250.peg.1027	CDS	1	1271746	1271036	-1	-	711	Uncharacterized protein DUF547	- none -
fig|6666666.563250.peg.1028	CDS	1	1272041	1273345	2	+	1305	Nitrite reductase probable [NAD(P)H] subunit (EC 1.7.1.4)	Nitrate and nitrite ammonification
fig|6666666.563250.peg.1029	CDS	1	1273391	1274989	2	+	1599	Iron-sulfur cluster-binding protein	- none -
fig|6666666.563250.peg.1030	CDS	1	1275097	1275597	1	+	501	Phophatidylinositol-4-phosphate 5-kinase	- none -
fig|6666666.563250.peg.1031	CDS	1	1275598	1276290	1	+	693	Glycosyltransferase	- none -
fig|6666666.563250.peg.1032	CDS	1	1276290	1277762	3	+	1473	Glycosyltransferase	- none -
fig|6666666.563250.peg.1033	CDS	1	1277759	1279135	2	+	1377	hypothetical protein	- none -
fig|6666666.563250.peg.1034	CDS	1	1279166	1279312	2	+	147	hypothetical protein	- none -
fig|6666666.563250.peg.1035	CDS	1	1280619	1279780	-3	-	840	LSU rRNA pseudouridine(2605) synthase (EC 5.4.99.22)	- none -
fig|6666666.563250.peg.1036	CDS	1	1281624	1280668	-3	-	957	Nitrilase (EC 3.5.5.7)	- none -
fig|6666666.563250.peg.1037	CDS	1	1282133	1282477	2	+	345	hypothetical protein	- none -
fig|6666666.563250.peg.1038	CDS	1	1283289	1283633	3	+	345	hypothetical protein	- none -
fig|6666666.563250.peg.1039	CDS	1	1284653	1283739	-2	-	915	Similar to (S)-2,3-di-O-geranylgeranylglyceryl phosphate synthase	- none -
fig|6666666.563250.peg.1040	CDS	1	1285646	1284675	-2	-	972	Phosphomevalonate kinase (EC 2.7.4.2)	Mevalonate Branch of Isoprenoid Biosynthesis
fig|6666666.563250.peg.1041	CDS	1	1286744	1285659	-2	-	1086	Diphosphomevalonate decarboxylase (EC 4.1.1.33)	Mevalonate Branch of Isoprenoid Biosynthesis
fig|6666666.563250.peg.1042	CDS	1	1286847	1287320	3	+	474	Benzodiazepine receptor TspO	- none -
fig|6666666.563250.peg.1043	CDS	1	1287358	1287921	1	+	564	Transcriptional regulator, TetR family	- none -
fig|6666666.563250.peg.1044	CDS	1	1288837	1288049	-1	-	789	hypothetical protein	- none -
fig|6666666.563250.peg.1045	CDS	1	1289451	1288912	-3	-	540	hypothetical protein	- none -
fig|6666666.563250.peg.1046	CDS	1	1290668	1289457	-2	-	1212	FIG00648790: hypothetical protein	- none -
fig|6666666.563250.peg.1047	CDS	1	1291345	1290665	-1	-	681	Glycerophosphoryl diester phosphodiesterase (EC 3.1.4.46)	- none -
fig|6666666.563250.peg.1048	CDS	1	1292535	1291357	-3	-	1179	Glutaryl-CoA dehydrogenase (EC 1.3.8.6)	- none -
fig|6666666.563250.peg.1049	CDS	1	1292566	1292706	1	+	141	hypothetical protein	- none -
fig|6666666.563250.peg.1050	CDS	1	1292899	1293198	1	+	300	hypothetical protein	- none -
fig|6666666.563250.peg.1051	CDS	1	1294412	1293699	-2	-	714	tRNA(1)(Val) (adenine(37)-N(6))-methyltransferase (EC 2.1.1.223)	- none -
fig|6666666.563250.peg.1052	CDS	1	1294959	1294435	-3	-	525	16S rRNA processing protein RimM	- none -
fig|6666666.563250.peg.1053	CDS	1	1295509	1294979	-1	-	531	SSU ribosomal protein S16p	Ribosome SSU bacterial
fig|6666666.563250.peg.1054	CDS	1	1295850	1296680	3	+	831	hypothetical protein	- none -
fig|6666666.563250.peg.1055	CDS	1	1296850	1301235	1	+	4386	DEDDh 3&#39;-5&#39; exonuclease domain / DNA polymerase III alpha subunit (EC 2.7.7.7)	- none -
fig|6666666.563250.peg.1056	CDS	1	1301767	1302084	1	+	318	Thioredoxin	- none -
fig|6666666.563250.peg.1057	CDS	1	1302168	1303094	3	+	927	hypothetical protein	- none -
fig|6666666.563250.peg.1058	CDS	1	1303913	1303404	-2	-	510	probable membrane protein NMA1128	- none -
fig|6666666.563250.peg.1059	CDS	1	1304131	1305270	1	+	1140	TPR domain protein	- none -
fig|6666666.563250.peg.1060	CDS	1	1305379	1305858	1	+	480	hypothetical protein	- none -
fig|6666666.563250.peg.1061	CDS	1	1305909	1306466	3	+	558	Crossover junction endodeoxyribonuclease RuvC (EC 3.1.22.4)	- none -
fig|6666666.563250.peg.1062	CDS	1	1306628	1307671	2	+	1044	Oxygen-independent coproporphyrinogen-III oxidase-like protein YggW	- none -
fig|6666666.563250.peg.1063	CDS	1	1307703	1308470	3	+	768	N-formylkynurenine (Aryl-) formamidase (EC 3.5.1.9)	- none -
fig|6666666.563250.peg.1064	CDS	1	1308576	1309196	3	+	621	hypothetical protein	- none -
fig|6666666.563250.peg.1065	CDS	1	1309196	1309615	2	+	420	Histone acetyltransferase HPA2 and related acetyltransferases	- none -
fig|6666666.563250.peg.1066	CDS	1	1309612	1309968	1	+	357	hypothetical protein	- none -
fig|6666666.563250.peg.1067	CDS	1	1309993	1311762	1	+	1770	MutS-related protein, family 1	DNA repair, bacterial MutL-MutS system
fig|6666666.563250.peg.1068	CDS	1	1312317	1313282	3	+	966	hypothetical protein	- none -
fig|6666666.563250.peg.1069	CDS	1	1314193	1313333	-1	-	861	Transcriptional regulator	- none -
fig|6666666.563250.peg.1070	CDS	1	1314334	1315266	1	+	933	1-pyrroline-4-hydroxy-2-carboxylate deaminase (EC 3.5.4.22)	Proline, 4-hydroxyproline uptake and utilization
fig|6666666.563250.peg.1071	CDS	1	1315362	1316945	3	+	1584	2,5-dioxovalerate dehydrogenase (EC 1.2.1.26)	- none -
fig|6666666.563250.peg.1072	CDS	1	1316956	1318686	1	+	1731	protein of unknown function DUF885	- none -
fig|6666666.563250.peg.1073	CDS	1	1318679	1319689	2	+	1011	4-hydroxyproline epimerase (EC 5.1.1.8)	Proline, 4-hydroxyproline uptake and utilization
fig|6666666.563250.peg.1074	CDS	1	1319709	1320953	3	+	1245	D-amino acid dehydrogenase family protein in hydroxy-L-proline catabolic cluster	- none -
fig|6666666.563250.peg.1075	CDS	1	1320997	1322223	1	+	1227	Proline dipeptidase	- none -
fig|6666666.563250.peg.1076	CDS	1	1323449	1322349	-2	-	1101	hypothetical protein	- none -
fig|6666666.563250.peg.1077	CDS	1	1323651	1323767	3	+	117	hypothetical protein	- none -
fig|6666666.563250.peg.1078	CDS	1	1325120	1323777	-2	-	1344	Regulatory sensor-transducer, BlaR1/MecR1 family / TonB-dependent receptor	Ton and Tol transport systems
fig|6666666.563250.peg.1079	CDS	1	1325488	1325117	-1	-	372	Transcriptional regulator, MecI family	- none -
fig|6666666.563250.peg.1080	CDS	1	1328721	1325608	-3	-	3114	hypothetical protein	- none -
fig|6666666.563250.peg.1081	CDS	1	1330303	1328915	-1	-	1389	Acetylornithine deacetylase/Succinyl-diaminopimelate desuccinylase and related deacylases	- none -
fig|6666666.563250.peg.1082	CDS	1	1332580	1331258	-1	-	1323	Membrane-associated zinc metalloprotease	- none -
fig|6666666.563250.peg.1083	CDS	1	1332741	1333409	3	+	669	Cytochrome oxidase biogenesis protein Sco1/SenC/PrrC, thiol-disulfide reductase involved in Cu(I) insertion into CoxII Cu(A) center	- none -
fig|6666666.563250.peg.1084	CDS	1	1333925	1333410	-2	-	516	Nudix hydrolase family protein	- none -
fig|6666666.563250.peg.1085	CDS	1	1335133	1334036	-1	-	1098	N-acetylglucosamine related transporter, NagX	- none -
fig|6666666.563250.peg.1086	CDS	1	1336945	1335137	-1	-	1809	sodium-solute symporter, putative	- none -
fig|6666666.563250.peg.1087	CDS	1	1337674	1336952	-1	-	723	Two-component transcriptional response regulator, LuxR family	- none -
fig|6666666.563250.peg.1088	CDS	1	1338489	1337671	-3	-	819	Putative two-component system sensor protein, no kinase domain	- none -
fig|6666666.563250.peg.1089	CDS	1	1338943	1342008	1	+	3066	Outer membrane TonB-dependent transporter, utilization system for glycans and polysaccharides (PUL), SusC family	- none -
fig|6666666.563250.peg.1090	CDS	1	1342020	1343570	3	+	1551	Cell surface glycan-binding lipoprotein, utilization system for glycans and polysaccharides (PUL), SusD family	- none -
fig|6666666.563250.peg.1091	CDS	1	1343675	1345591	2	+	1917	Glucosamine-6-phosphate deaminase (EC 3.5.99.6) / domain similar to N-acetylglucosaminyl-phosphatidylinositol de-N-acetylase	- none -
fig|6666666.563250.peg.1092	CDS	1	1345714	1346415	1	+	702	Transcriptional regulator, LacI family	- none -
fig|6666666.563250.peg.1093	CDS	1	1346489	1348798	2	+	2310	beta-glycosyl hydrolase	- none -
fig|6666666.563250.peg.1094	CDS	1	1348935	1350662	3	+	1728	beta-hexosaminidase precursor	- none -
fig|6666666.563250.peg.1095	CDS	1	1354099	1350806	-1	-	3294	hypothetical protein	- none -
fig|6666666.563250.peg.1096	CDS	1	1354491	1354357	-3	-	135	hypothetical protein	- none -
fig|6666666.563250.peg.1097	CDS	1	1354633	1356546	1	+	1914	Acetyl-CoA synthetase (EC 6.2.1.1)	- none -
fig|6666666.563250.peg.1098	CDS	1	1356638	1357669	2	+	1032	hypothetical protein	- none -
fig|6666666.563250.peg.1099	CDS	1	1357784	1358338	2	+	555	hypothetical protein	- none -
fig|6666666.563250.peg.1100	CDS	1	1358523	1359248	3	+	726	hypothetical protein	- none -
fig|6666666.563250.peg.1101	CDS	1	1359254	1361185	2	+	1932	Two-component system sensor histidine kinase	- none -
fig|6666666.563250.peg.1102	CDS	1	1361302	1362441	1	+	1140	hypothetical protein	- none -
fig|6666666.563250.peg.1103	CDS	1	1362813	1363427	3	+	615	hypothetical protein	- none -
fig|6666666.563250.peg.1104	CDS	1	1364083	1363523	-1	-	561	RNA polymerase ECF-type sigma factor	- none -
fig|6666666.563250.peg.1105	CDS	1	1364173	1365348	1	+	1176	putative anti-sigma factor	- none -
fig|6666666.563250.peg.1106	CDS	1	1365428	1368667	2	+	3240	TonB-dependent receptor; Outer membrane receptor for ferrienterochelin and colicins	Ton and Tol transport systems
fig|6666666.563250.peg.1107	CDS	1	1370617	1368926	-1	-	1692	hypothetical protein	- none -
fig|6666666.563250.peg.1108	CDS	1	1371281	1370850	-2	-	432	hypothetical protein	- none -
fig|6666666.563250.peg.1109	CDS	1	1371733	1371608	-1	-	126	hypothetical protein	- none -
fig|6666666.563250.peg.1110	CDS	1	1372616	1371762	-2	-	855	putative universal stress protein UspA	- none -
fig|6666666.563250.peg.1111	CDS	1	1373481	1372630	-3	-	852	FIG00652502: hypothetical protein	- none -
fig|6666666.563250.peg.1112	CDS	1	1374858	1373584	-3	-	1275	Two-component system sensor histidine kinase	- none -
fig|6666666.563250.peg.1113	CDS	1	1375623	1374985	-3	-	639	hypothetical protein	- none -
fig|6666666.563250.peg.1114	CDS	1	1377597	1375636	-3	-	1962	TonB-dependent receptor; Outer membrane receptor for ferrienterochelin and colicins	Ton and Tol transport systems
fig|6666666.563250.peg.1115	CDS	1	1377817	1378716	1	+	900	FIG00653516: hypothetical protein	- none -
fig|6666666.563250.peg.1116	CDS	1	1379887	1379069	-1	-	819	hypothetical protein	- none -
fig|6666666.563250.peg.1117	CDS	1	1380448	1379912	-1	-	537	RNA polymerase sigma-70 factor, ECF subfamily	- none -
fig|6666666.563250.peg.1118	CDS	1	1380654	1381982	3	+	1329	Alkaline protease precursor	- none -
fig|6666666.563250.peg.1119	CDS	1	1382164	1384962	1	+	2799	hypothetical protein	- none -
fig|6666666.563250.peg.1120	CDS	1	1385044	1386357	1	+	1314	ATP-dependent RNA helicase BT1154	- none -
fig|6666666.563250.peg.1121	CDS	1	1387151	1388227	2	+	1077	Putative anti-sigma factor	- none -
fig|6666666.563250.peg.1122	CDS	1	1388406	1392002	3	+	3597	Outer membrane TonB-dependent transporter, utilization system for glycans and polysaccharides (PUL), SusC family	- none -
fig|6666666.563250.peg.1123	CDS	1	1392015	1393511	3	+	1497	Cell surface glycan-binding lipoprotein, utilization system for glycans and polysaccharides (PUL), SusD family	- none -
fig|6666666.563250.peg.1124	CDS	1	1393539	1394387	3	+	849	hypothetical protein	- none -
fig|6666666.563250.peg.1125	CDS	1	1394403	1395752	3	+	1350	hypothetical protein	- none -
fig|6666666.563250.peg.1126	CDS	1	1395898	1397028	1	+	1131	Chromate transport protein ChrA	Resistance to chromium compounds
fig|6666666.563250.peg.1127	CDS	1	1397145	1397990	3	+	846	putative universal stress protein UspA	- none -
fig|6666666.563250.peg.1128	CDS	1	1398062	1398901	2	+	840	hypothetical protein	- none -
fig|6666666.563250.peg.1129	CDS	1	1399029	1400444	3	+	1416	MBL-fold metallo-hydrolase superfamily	- none -
fig|6666666.563250.peg.1130	CDS	1	1401422	1400520	-2	-	903	2x Universal stress protein A (2UspA)	- none -
fig|6666666.563250.peg.1131	CDS	1	1401624	1404038	3	+	2415	Type cbb3 cytochrome oxidase biogenesis protein CcoI; Copper-translocating P-type ATPase (EC 3.6.3.4)	Biogenesis of cbb3-type cytochrome c oxidases; <br>Copper Transport System; <br>Copper homeostasis
fig|6666666.563250.peg.1132	CDS	1	1404019	1404612	1	+	594	Pyridoxamine 5&#39;-phosphate oxidase (EC 1.4.3.5)	Pyridoxin (Vitamin B6) Biosynthesis
fig|6666666.563250.peg.1133	CDS	1	1404822	1405016	3	+	195	Type cbb3 cytochrome oxidase biogenesis protein CcoS, involved in heme b insertion	Biogenesis of cbb3-type cytochrome c oxidases
fig|6666666.563250.peg.1134	CDS	1	1405025	1407217	2	+	2193	Cytochrome c oxidase (cbb3-type) subunit CcoN (EC 1.9.3.1) / Cytochrome c oxidase (cbb3-type) subunit CcoO (EC 1.9.3.1)	- none -
fig|6666666.563250.peg.1135	CDS	1	1407223	1407408	1	+	186	Cytochrome c oxidase (cbb3-type) subunit CcoQ (EC 1.9.3.1)	- none -
fig|6666666.563250.peg.1136	CDS	1	1407405	1408301	3	+	897	Cytochrome c oxidase (cbb3-type) subunit CcoP (EC 1.9.3.1)	- none -
fig|6666666.563250.peg.1137	CDS	1	1408390	1409811	1	+	1422	Type cbb3 cytochrome oxidase biogenesis protein CcoG, involved in Cu oxidation	Biogenesis of cbb3-type cytochrome c oxidases
fig|6666666.563250.peg.1138	CDS	1	1410034	1410480	1	+	447	cytochrome cbb3 oxidase maturation protein CcoH	- none -
fig|6666666.563250.peg.1139	CDS	1	1410490	1411197	1	+	708	Heavy-metal-associated domain (N-terminus) and membrane-bounded cytochrome biogenesis cycZ-like domain, possible membrane copper tolerance protein	- none -
fig|6666666.563250.peg.1140	CDS	1	1411320	1411856	3	+	537	cAMP-binding proteins - catabolite gene activator and regulatory subunit of cAMP-dependent protein kinases	cAMP signaling in bacteria
fig|6666666.563250.peg.1141	CDS	1	1411919	1412494	2	+	576	hypothetical protein	- none -
fig|6666666.563250.peg.1142	CDS	1	1413887	1412523	-2	-	1365	Coproporphyrinogen III oxidase, oxygen-independent (EC 1.3.99.22)	Heme and Siroheme Biosynthesis
fig|6666666.563250.peg.1143	CDS	1	1414763	1413927	-2	-	837	Universal stress protein	- none -
fig|6666666.563250.peg.1144	CDS	1	1415908	1414853	-1	-	1056	Two-component transcriptional response regulator, LuxR family	- none -
fig|6666666.563250.peg.1145	CDS	1	1417147	1415921	-1	-	1227	Two-component system sensor histidine kinase	- none -
fig|6666666.563250.peg.1146	CDS	1	1417260	1417658	3	+	399	FIG00651111: hypothetical protein	- none -
fig|6666666.563250.peg.1147	CDS	1	1417686	1418573	3	+	888	hypothetical protein	- none -
fig|6666666.563250.peg.1148	CDS	1	1419617	1418781	-2	-	837	Universal stress protein Coch_1269	- none -
fig|6666666.563250.peg.1149	CDS	1	1420028	1419729	-2	-	300	Ribosome hibernation promoting factor Hpf	- none -
fig|6666666.563250.peg.1150	CDS	1	1420181	1421077	2	+	897	hypothetical protein	- none -
fig|6666666.563250.peg.1151	CDS	1	1421439	1421194	-3	-	246	NifU-like domain protein	- none -
fig|6666666.563250.peg.1152	CDS	1	1422579	1421443	-3	-	1137	Septum site-determining protein MinD	Bacterial cell division cluster; <br>Septum site-determining cluster Min
fig|6666666.563250.peg.1153	CDS	1	1423098	1422763	-3	-	336	Methylated-DNA-[protein]-cysteine S-methyltransferase	- none -
fig|6666666.563250.peg.1154	CDS	1	1423724	1423089	-2	-	636	hypothetical protein	- none -
fig|6666666.563250.peg.1155	CDS	1	1424407	1423721	-1	-	687	tRNA (guanine(46)-N(7))-methyltransferase (EC 2.1.1.33)	- none -
fig|6666666.563250.peg.1156	CDS	1	1426652	1425573	-2	-	1080	Membrane anchored sensor signal transduction histidine kinase Fjoh_0543	- none -
fig|6666666.563250.peg.1157	CDS	1	1427335	1426652	-1	-	684	Two-component transcriptional response regulator Fjoh_0544, OmpR family	- none -
fig|6666666.563250.peg.1158	CDS	1	1429998	1427608	-3	-	2391	Probable low-affinity inorganic phosphate transporter	Phosphate metabolism
fig|6666666.563250.peg.1159	CDS	1	1431282	1430086	-3	-	1197	phosphate-selective porin O and P	- none -
fig|6666666.563250.peg.1160	CDS	1	1431781	1432170	1	+	390	hypothetical protein	- none -
fig|6666666.563250.peg.1161	CDS	1	1432548	1435316	3	+	2769	hypothetical protein	- none -
fig|6666666.563250.peg.1162	CDS	1	1435534	1436805	1	+	1272	hypothetical protein	- none -
fig|6666666.563250.peg.1163	CDS	1	1438303	1436897	-1	-	1407	Multi antimicrobial extrusion protein (Na(+)/drug antiporter), MATE family of MDR efflux pumps	Multidrug Resistance Efflux Pumps
fig|6666666.563250.peg.1164	CDS	1	1438589	1438900	2	+	312	hypothetical protein	- none -
fig|6666666.563250.peg.1165	CDS	1	1438984	1439961	1	+	978	Possible acyl protein synthase/acyl-CoA reductase-like protein	- none -
fig|6666666.563250.peg.1166	CDS	1	1440165	1440001	-3	-	165	hypothetical protein	- none -
fig|6666666.563250.peg.1167	CDS	1	1440197	1440976	2	+	780	hypothetical protein	- none -
fig|6666666.563250.peg.1168	CDS	1	1440986	1441501	2	+	516	hypothetical protein	- none -
fig|6666666.563250.peg.1169	CDS	1	1441589	1442041	2	+	453	hypothetical protein	- none -
fig|6666666.563250.peg.1170	CDS	1	1443419	1442124	-2	-	1296	Tyrosyl-tRNA synthetase (EC 6.1.1.1)	tRNA aminoacylation, Tyr
fig|6666666.563250.peg.1171	CDS	1	1443611	1444642	2	+	1032	3-beta hydroxysteroid dehydrogenase/isomerase family protein	- none -
fig|6666666.563250.peg.1172	CDS	1	1445085	1444648	-3	-	438	hypothetical protein	- none -
fig|6666666.563250.peg.1173	CDS	1	1446484	1445144	-1	-	1341	Dihydroorotase (EC 3.5.2.3)	- none -
fig|6666666.563250.peg.1174	CDS	1	1447218	1446487	-3	-	732	Dolichol-phosphate mannosyltransferase	- none -
fig|6666666.563250.peg.1175	CDS	1	1447404	1448060	3	+	657	hypothetical protein	- none -
fig|6666666.563250.peg.1176	CDS	1	1448095	1448841	1	+	747	Uroporphyrinogen-III synthase (EC 4.2.1.75)	Heme and Siroheme Biosynthesis
fig|6666666.563250.peg.1177	CDS	1	1448842	1448955	1	+	114	hypothetical protein	- none -
fig|6666666.563250.peg.1178	CDS	1	1450538	1448982	-2	-	1557	Phosphoenolpyruvate carboxykinase [ATP] (EC 4.1.1.49)	Pyruvate metabolism I: anaplerotic reactions, PEP
fig|6666666.563250.peg.1179	CDS	1	1450993	1450610	-1	-	384	FIG00018398: hypothetical regulator	- none -
fig|6666666.563250.peg.1180	CDS	1	1451147	1452517	2	+	1371	Saccharopine dehydrogenase [NADP, L-glutamate-forming] (EC 1.5.1.10)	- none -
fig|6666666.563250.peg.1181	CDS	1	1452597	1453067	3	+	471	Transcriptional regulator, AsnC family	- none -
fig|6666666.563250.peg.1182	CDS	1	1453248	1453373	3	+	126	hypothetical protein	- none -
fig|6666666.563250.peg.1183	CDS	1	1453395	1453808	3	+	414	hypothetical protein	- none -
fig|6666666.563250.peg.1184	CDS	1	1454640	1453948	-3	-	693	Putative membrane protease YugP	- none -
fig|6666666.563250.peg.1185	CDS	1	1455857	1454742	-2	-	1116	Alanine dehydrogenase (EC 1.4.1.1)	Pyruvate Alanine Serine Interconversions
fig|6666666.563250.peg.1186	CDS	1	1458890	1456062	-2	-	2829	Leucyl-tRNA synthetase (EC 6.1.1.4)	tRNA aminoacylation, Leu
fig|6666666.563250.peg.1187	CDS	1	1459937	1459014	-2	-	924	2-dehydropantoate 2-reductase (EC 1.1.1.169)	Coenzyme A Biosynthesis
fig|6666666.563250.peg.1188	CDS	1	1460127	1461005	3	+	879	Cell-division-associated, ABC-transporter-like signaling protein FtsX	- none -
fig|6666666.563250.peg.1189	CDS	1	1461009	1461821	3	+	813	Prolipoprotein diacylglyceryl transferase	- none -
fig|6666666.563250.peg.1190	CDS	1	1461827	1462231	2	+	405	hypothetical protein	- none -
fig|6666666.563250.peg.1191	CDS	1	1462215	1462475	3	+	261	hypothetical protein	- none -
fig|6666666.563250.peg.1192	CDS	1	1462634	1463428	2	+	795	Undecaprenyl-diphosphatase (EC 3.6.1.27)	- none -
fig|6666666.563250.peg.1193	CDS	1	1463436	1464143	3	+	708	tRNA pseudouridine(55) synthase (EC 5.4.99.25)	- none -
fig|6666666.563250.peg.1194	CDS	1	1464177	1464902	3	+	726	hypothetical protein	- none -
fig|6666666.563250.peg.1195	CDS	1	1465528	1464911	-1	-	618	Uncharacterized protein Fjoh_0571	- none -
fig|6666666.563250.peg.1196	CDS	1	1465851	1467599	3	+	1749	hypothetical protein	- none -
fig|6666666.563250.peg.1197	CDS	1	1467655	1468218	1	+	564	DNA-3-methyladenine glycosylase (EC 3.2.2.20)	- none -
fig|6666666.563250.peg.1198	CDS	1	1468906	1468223	-1	-	684	Uracil phosphoribosyltransferase (EC 2.4.2.9)	pyrimidine conversions
fig|6666666.563250.peg.1199	CDS	1	1469554	1468913	-1	-	642	Leucyl/phenylalanyl-tRNA--protein transferase (EC 2.3.2.6)	Protein degradation
fig|6666666.563250.peg.1200	CDS	1	1469719	1469588	-1	-	132	hypothetical protein	- none -
fig|6666666.563250.peg.1201	CDS	1	1470174	1469794	-3	-	381	hypothetical protein	- none -
fig|6666666.563250.peg.1202	CDS	1	1471059	1470187	-3	-	873	hypothetical protein	- none -
fig|6666666.563250.peg.1203	CDS	1	1471200	1472363	3	+	1164	Two-component system sensor histidine kinase	- none -
fig|6666666.563250.peg.1204	CDS	1	1472408	1472767	2	+	360	hypothetical protein	- none -
fig|6666666.563250.peg.1205	CDS	1	1473187	1472774	-1	-	414	Predicted thioesterase	- none -
fig|6666666.563250.peg.1206	CDS	1	1473586	1473197	-1	-	390	HIT family protein	- none -
fig|6666666.563250.peg.1207	CDS	1	1474182	1473706	-3	-	477	Transcription elongation factor GreA	Transcription factors bacterial
fig|6666666.563250.peg.1208	CDS	1	1474370	1474879	2	+	510	hypothetical protein	- none -
fig|6666666.563250.peg.1209	CDS	1	1475946	1474876	-3	-	1071	Sulfur carrier protein ThiS adenylyltransferase (EC 2.7.7.73)	- none -
fig|6666666.563250.peg.1210	CDS	1	1477245	1476133	-3	-	1113	2-iminoacetate synthase (ThiH) (EC 4.1.99.19)	- none -
fig|6666666.563250.peg.1211	CDS	1	1478047	1477274	-1	-	774	Thiazole synthase (EC 2.8.1.10)	- none -
fig|6666666.563250.peg.1212	CDS	1	1478678	1478052	-2	-	627	Thiamin-phosphate pyrophosphorylase (EC 2.5.1.3)	5-FCL-like protein; <br>Thiamin biosynthesis
fig|6666666.563250.peg.1213	CDS	1	1479423	1478671	-3	-	753	Hydroxymethylpyrimidine phosphate kinase ThiD (EC 2.7.4.7)	- none -
fig|6666666.563250.peg.1214	CDS	1	1480045	1479443	-1	-	603	Thiazole tautomerase TenI (EC 5.3.99.10)	- none -
fig|6666666.563250.peg.1215	CDS	1	1481965	1480106	-1	-	1860	Phosphomethylpyrimidine synthase ThiC (EC 4.1.99.17)	- none -
fig|6666666.563250.peg.1216	CDS	1	1482304	1482104	-1	-	201	hypothetical protein	- none -
fig|6666666.563250.peg.1217	CDS	1	1484806	1482620	-1	-	2187	Thiamin-regulated outer membrane receptor Omr1	Thiamin biosynthesis
fig|6666666.563250.peg.1218	CDS	1	1485152	1487575	2	+	2424	Two-component system sensor histidine kinase	- none -
fig|6666666.563250.peg.1219	CDS	1	1488924	1487572	-3	-	1353	RteB, two-component system response regulator	- none -
fig|6666666.563250.peg.1220	CDS	1	1489582	1489151	-1	-	432	hypothetical protein	- none -
fig|6666666.563250.peg.1221	CDS	1	1491302	1489737	-2	-	1566	Unknown conserved in Flavobacteria	- none -
fig|6666666.563250.peg.1222	CDS	1	1491832	1491299	-1	-	534	Ribosylnicotinamide kinase (EC 2.7.1.22)	NAD and NADP cofactor biosynthesis global
fig|6666666.563250.peg.1223	CDS	1	1492461	1491829	-3	-	633	Ribosyl nicotinamide transporter, PnuC-like	NAD and NADP cofactor biosynthesis global
fig|6666666.563250.peg.1224	CDS	1	1492705	1492445	-1	-	261	hypothetical protein	- none -
fig|6666666.563250.peg.1225	CDS	1	1493369	1492737	-2	-	633	Siderophore (Surfactin) biosynthesis regulatory protein	- none -
fig|6666666.563250.peg.1226	CDS	1	1493507	1494823	2	+	1317	Adenosylhomocysteinase (EC 3.3.1.1)	Methionine Biosynthesis; <br>Methionine Degradation
fig|6666666.563250.peg.1227	CDS	1	1495518	1494937	-3	-	582	hypothetical protein	- none -
fig|6666666.563250.peg.1228	CDS	1	1496089	1495829	-1	-	261	LSU ribosomal protein L27p	CBSS-176279.3.peg.868
fig|6666666.563250.peg.1229	CDS	1	1496759	1496124	-2	-	636	LSU ribosomal protein L21p	CBSS-176279.3.peg.868
fig|6666666.563250.peg.1230	CDS	1	1497330	1496857	-3	-	474	hypothetical protein	- none -
fig|6666666.563250.peg.1231	CDS	1	1497494	1498819	2	+	1326	FIG015547: peptidase, M16 family	- none -
fig|6666666.563250.peg.1232	CDS	1	1498872	1500938	3	+	2067	FIG015287: Zinc protease	- none -
fig|6666666.563250.peg.1233	CDS	1	1501868	1500990	-2	-	879	Permease of the drug/metabolite transporter (DMT) superfamily	- none -
fig|6666666.563250.peg.1234	CDS	1	1502465	1501983	-2	-	483	GldD	- none -
fig|6666666.563250.peg.1235	CDS	1	1503873	1502536	-3	-	1338	Hemolysins and related proteins containing CBS domains	- none -
fig|6666666.563250.peg.1236	CDS	1	1504362	1503901	-3	-	462	Single-stranded DNA-binding protein	DNA repair, bacterial; <br>DNA repair, bacterial RecFOR pathway
fig|6666666.563250.peg.1237	CDS	1	1505558	1504509	-2	-	1050	A/G-specific adenine glycosylase (EC 3.2.2.-)	DNA repair, bacterial
fig|6666666.563250.peg.1238	CDS	1	1505691	1505981	3	+	291	DNA-binding protein HU	DNA structural proteins, bacterial
fig|6666666.563250.peg.1239	CDS	1	1506281	1507819	2	+	1539	Ribonuclease G	- none -
fig|6666666.563250.peg.1240	CDS	1	1508750	1507866	-2	-	885	Lanthionine biosynthesis protein LanB	Lanthionine Synthetases
fig|6666666.563250.peg.1241	CDS	1	1510975	1508741	-1	-	2235	Lanthionine biosynthesis protein LanB	Lanthionine Synthetases
fig|6666666.563250.peg.1242	CDS	1	1513143	1511461	-3	-	1683	Protease precursor	- none -
fig|6666666.563250.peg.1243	CDS	1	1513531	1513343	-1	-	189	hypothetical protein	- none -
fig|6666666.563250.peg.1244	CDS	1	1515342	1513660	-3	-	1683	hypothetical protein	- none -
fig|6666666.563250.peg.1245	CDS	1	1515665	1515907	2	+	243	hypothetical protein	- none -
fig|6666666.563250.peg.1246	CDS	1	1515910	1516158	1	+	249	hypothetical protein	- none -
fig|6666666.563250.peg.1247	CDS	1	1516178	1516423	2	+	246	hypothetical protein	- none -
fig|6666666.563250.peg.1248	CDS	1	1516522	1517151	1	+	630	hypothetical protein	- none -
fig|6666666.563250.peg.1249	CDS	1	1517184	1518119	3	+	936	hypothetical protein	- none -
fig|6666666.563250.peg.1250	CDS	1	1518097	1520706	1	+	2610	hypothetical protein	- none -
fig|6666666.563250.peg.1251	CDS	1	1520719	1521462	1	+	744	hypothetical protein	- none -
fig|6666666.563250.peg.1252	CDS	1	1521568	1522047	1	+	480	Regulatory protein RecX	DNA repair system including RecA, MutS and a hypothetical protein; <br>RecA and RecX
fig|6666666.563250.peg.1253	CDS	1	1522912	1522037	-1	-	876	RIKEN cDNA 3110005O21 gene	- none -
fig|6666666.563250.peg.1254	CDS	1	1524065	1522968	-2	-	1098	Biotin synthase (EC 2.8.1.6)	Biotin biosynthesis; <br>Biotin biosynthesis Experimental
fig|6666666.563250.peg.1255	CDS	1	1525301	1524330	-2	-	972	Hydrolase, alpha/beta fold family	- none -
fig|6666666.563250.peg.1256	CDS	1	1526560	1525394	-1	-	1167	3-oxoacyl-[acyl-carrier-protein] synthase, KASII (EC 2.3.1.179)	- none -
fig|6666666.563250.peg.1257	CDS	1	1526756	1527199	2	+	444	hypothetical protein	- none -
fig|6666666.563250.peg.1258	CDS	1	1528518	1527250	-3	-	1269	Adenosylmethionine-8-amino-7-oxononanoate aminotransferase (EC 2.6.1.62)	Biotin biosynthesis; <br>Biotin biosynthesis Experimental
fig|6666666.563250.peg.1259	CDS	1	1529150	1528527	-2	-	624	Dethiobiotin synthase BioD (EC 6.3.3.3)	- none -
fig|6666666.563250.peg.1260	CDS	1	1530528	1529362	-3	-	1167	8-amino-7-oxononanoate synthase (EC 2.3.1.47)	Biotin biosynthesis; <br>Biotin biosynthesis Experimental
fig|6666666.563250.peg.1261	CDS	1	1530689	1532653	2	+	1965	hypothetical protein	- none -
fig|6666666.563250.peg.1262	CDS	1	1532854	1534284	1	+	1431	Soluble pyridine nucleotide transhydrogenase (EC 1.6.1.1)	Phosphate metabolism
fig|6666666.563250.peg.1263	CDS	1	1534343	1535434	2	+	1092	Adenylate cyclase (EC 4.6.1.1)	cAMP signaling in bacteria
fig|6666666.563250.peg.1264	CDS	1	1535450	1535998	2	+	549	Acetyltransferase, GNAT family	- none -
fig|6666666.563250.peg.1265	CDS	1	1536214	1536807	1	+	594	Tyrosine/serine protein phosphatase	- none -
fig|6666666.563250.peg.1266	CDS	1	1536860	1537882	2	+	1023	UDP-glucuronate 5&#39;-epimerase (EC 5.1.3.12)	- none -
fig|6666666.563250.peg.1267	CDS	1	1539593	1537914	-2	-	1680	hypothetical protein	- none -
fig|6666666.563250.peg.1268	CDS	1	1539777	1540748	3	+	972	Glycosyl transferase, family 2	- none -
fig|6666666.563250.peg.1269	CDS	1	1540711	1541607	1	+	897	hypothetical protein	- none -
fig|6666666.563250.peg.1270	CDS	1	1541935	1541642	-1	-	294	ATP synthase epsilon chain (EC 3.6.3.14)	F0F1-type ATP synthase
fig|6666666.563250.peg.1271	CDS	1	1543456	1541948	-1	-	1509	ATP synthase beta chain (EC 3.6.3.14)	F0F1-type ATP synthase
fig|6666666.563250.peg.1272	CDS	1	1545561	1543714	-3	-	1848	Glutamine--fructose-6-phosphate aminotransferase [isomerizing] (EC 2.6.1.16)	- none -
fig|6666666.563250.peg.1273	CDS	1	1547236	1545581	-1	-	1656	hypothetical protein	- none -
fig|6666666.563250.peg.1274	CDS	1	1548063	1547254	-3	-	810	Similar to glycogen synthase (EC 2.4.1.21)	- none -
fig|6666666.563250.peg.1275	CDS	1	1548174	1549022	3	+	849	Pantoate--beta-alanine ligase (EC 6.3.2.1)	Coenzyme A Biosynthesis; <br>Coenzyme A Biosynthesis cluster; <br>Folate biosynthesis cluster
fig|6666666.563250.peg.1276	CDS	1	1549042	1549392	1	+	351	Aspartate 1-decarboxylase (EC 4.1.1.11)	Coenzyme A Biosynthesis; <br>Coenzyme A Biosynthesis cluster; <br>Folate biosynthesis cluster
fig|6666666.563250.peg.1277	CDS	1	1549396	1550361	1	+	966	putative dolichol-P-glucose synthetase	- none -
fig|6666666.563250.peg.1278	CDS	1	1550402	1551550	2	+	1149	Putative esterase	- none -
fig|6666666.563250.peg.1279	CDS	1	1551660	1553027	3	+	1368	DNA repair protein RadA	DNA repair, bacterial; <br>Proteolysis in bacteria, ATP-dependent
fig|6666666.563250.peg.1280	CDS	1	1554219	1553077	-3	-	1143	SclB protein	- none -
fig|6666666.563250.peg.1281	CDS	1	1555423	1554392	-1	-	1032	Tas protein, an NADP(H)-dependent aldo-keto reductase	- none -
fig|6666666.563250.peg.1282	CDS	1	1555803	1556120	3	+	318	hypothetical protein	- none -
fig|6666666.563250.peg.1283	CDS	1	1556577	1556281	-3	-	297	hypothetical protein	- none -
fig|6666666.563250.peg.1284	CDS	1	1556832	1558970	3	+	2139	receptor, putative	- none -
fig|6666666.563250.peg.1285	CDS	1	1559061	1560464	3	+	1404	hypothetical protein	- none -
fig|6666666.563250.peg.1286	CDS	1	1561067	1561459	2	+	393	hypothetical protein	- none -
fig|6666666.563250.peg.1287	CDS	1	1562489	1561530	-2	-	960	OmpA domain protein	- none -
fig|6666666.563250.peg.1288	CDS	1	1563299	1562535	-2	-	765	Exodeoxyribonuclease III (EC 3.1.11.2)	DNA repair, bacterial
fig|6666666.563250.peg.1289	CDS	1	1564171	1563509	-1	-	663	ABC transporter, ATP-binding protein	- none -
fig|6666666.563250.peg.1290	CDS	1	1564457	1564173	-2	-	285	hypothetical protein	- none -
fig|6666666.563250.peg.1291	CDS	1	1564636	1564989	1	+	354	hypothetical protein	- none -
fig|6666666.563250.peg.1292	CDS	1	1567992	1564996	-3	-	2997	hypothetical protein	- none -
fig|6666666.563250.peg.1293	CDS	1	1569757	1568222	-1	-	1536	Glycyl-tRNA synthetase (EC 6.1.1.14)	Glycyl-tRNA synthetase containing cluster; <br>tRNA aminoacylation, Gly
fig|6666666.563250.peg.1294	CDS	1	1570780	1569899	-1	-	882	hypothetical protein	- none -
fig|6666666.563250.peg.1295	CDS	1	1570861	1571541	1	+	681	Competence protein F homolog, phosphoribosyltransferase domain; protein YhgH required for utilization of DNA as sole source of carbon and energy	Biotin biosynthesis Experimental
fig|6666666.563250.peg.1296	CDS	1	1571597	1573222	2	+	1626	hypothetical protein	- none -
fig|6666666.563250.peg.1297	CDS	1	1574023	1573238	-1	-	786	Putative hydrolase	- none -
fig|6666666.563250.peg.1298	CDS	1	1574163	1577579	3	+	3417	Isoleucyl-tRNA synthetase (EC 6.1.1.5)	tRNA aminoacylation, Ile
fig|6666666.563250.peg.1299	CDS	1	1577584	1577967	1	+	384	DnaK suppressor protein, putative	- none -
fig|6666666.563250.peg.1300	CDS	1	1578025	1578144	1	+	120	hypothetical protein	- none -
fig|6666666.563250.peg.1301	CDS	1	1578251	1578694	2	+	444	hypothetical protein	- none -
fig|6666666.563250.peg.1302	CDS	1	1578749	1579357	2	+	609	Lipoprotein signal peptidase (EC 3.4.23.36)	Signal peptidase
fig|6666666.563250.peg.1303	CDS	1	1579960	1579391	-1	-	570	5-formyltetrahydrofolate cyclo-ligase (EC 6.3.3.2)	5-FCL-like protein; <br>Folate Biosynthesis; <br>One-carbon metabolism by tetrahydropterines
fig|6666666.563250.peg.1304	CDS	1	1580936	1579935	-2	-	1002	FIG003737: Predicted deacylase	- none -
fig|6666666.563250.peg.1305	CDS	1	1581814	1580942	-1	-	873	Ribosomal protein S6--L-glutamate ligase	- none -
fig|6666666.563250.peg.1306	CDS	1	1582247	1581804	-2	-	444	hypothetical protein sometimes fused to ribosomal protein S6 glutaminyl transferase	- none -
fig|6666666.563250.peg.1307	CDS	1	1582404	1584203	3	+	1800	Excinuclease ABC subunit C	DNA repair, UvrABC system
fig|6666666.563250.peg.1308	CDS	1	1584213	1586504	3	+	2292	putative patatin-like phospholipase	- none -
fig|6666666.563250.peg.1309	CDS	1	1586669	1587826	2	+	1158	Homogentisate 1,2-dioxygenase (EC 1.13.11.5)	Homogentisate pathway of aromatic compound degradation; <br>Pterin carbinolamine dehydratase
fig|6666666.563250.peg.1310	CDS	1	1587980	1589119	2	+	1140	4-hydroxyphenylpyruvate dioxygenase (EC 1.13.11.27)	Aromatic amino acid degradation; <br>Homogentisate pathway of aromatic compound degradation; <br>Pterin carbinolamine dehydratase
fig|6666666.563250.peg.1311	CDS	1	1589508	1590290	3	+	783	ATP-dependent exoDNAse (exonuclease V) alpha subunit - helicase superfamily I member	- none -
fig|6666666.563250.peg.1312	CDS	1	1590291	1591259	3	+	969	Tryptophan 2,3-dioxygenase (EC 1.13.11.11)	Aromatic amino acid degradation; <br>NAD and NADP cofactor biosynthesis global
fig|6666666.563250.peg.1313	CDS	1	1591264	1592514	1	+	1251	Cell wall endopeptidase, family M23/M37	- none -
fig|6666666.563250.peg.1314	CDS	1	1592524	1594161	1	+	1638	Glucose-6-phosphate isomerase (EC 5.3.1.9)	- none -
fig|6666666.563250.peg.1315	CDS	1	1594339	1596966	1	+	2628	TonB-dependent receptor	Ton and Tol transport systems
fig|6666666.563250.peg.1316	CDS	1	1597073	1597513	2	+	441	Uncharacterized protein Fjoh_0737	- none -
fig|6666666.563250.peg.1317	CDS	1	1598005	1597583	-1	-	423	UPF0047 protein YjbQ	- none -
fig|6666666.563250.peg.1318	CDS	1	1598166	1598984	3	+	819	Predicted hydrolase	- none -
fig|6666666.563250.peg.1319	CDS	1	1600831	1599035	-1	-	1797	Translation elongation factor LepA	Translation elongation factors bacterial
fig|6666666.563250.peg.1320	CDS	1	1601281	1602273	1	+	993	tRNA-dihydrouridine synthase DusB	- none -
fig|6666666.563250.peg.1321	CDS	1	1603466	1602297	-2	-	1170	Lipoprotein releasing system transmembrane protein LolC/LolE	- none -
fig|6666666.563250.peg.1322	CDS	1	1604016	1603606	-3	-	411	Ribosome-binding factor A	CBSS-138119.3.peg.2719; <br>NusA-TFII Cluster; <br>Translation initiation factors bacterial
fig|6666666.563250.peg.1323	CDS	1	1604159	1604575	2	+	417	Lactoylglutathione lyase and related lyases	- none -
fig|6666666.563250.peg.1324	CDS	1	1605122	1605358	2	+	237	hypothetical protein	- none -
fig|6666666.563250.peg.1325	CDS	1	1605458	1605580	2	+	123	hypothetical protein	- none -
fig|6666666.563250.peg.1326	CDS	1	1606022	1607212	2	+	1191	hypothetical protein	- none -
fig|6666666.563250.peg.1327	CDS	1	1607635	1607495	-1	-	141	hypothetical protein	- none -
fig|6666666.563250.peg.1328	CDS	1	1608389	1607748	-2	-	642	hypothetical protein	- none -
fig|6666666.563250.peg.1329	CDS	1	1608972	1608580	-3	-	393	hypothetical protein	- none -
fig|6666666.563250.peg.1330	CDS	1	1609370	1608969	-2	-	402	Lactoylglutathione lyase (EC 4.4.1.5)	Glutathione: Non-redox reactions; <br>Methylglyoxal Metabolism
fig|6666666.563250.peg.1331	CDS	1	1610524	1609412	-1	-	1113	hypothetical protein	- none -
fig|6666666.563250.peg.1332	CDS	1	1611188	1611370	2	+	183	hypothetical protein	- none -
fig|6666666.563250.peg.1333	CDS	1	1612091	1611504	-2	-	588	Riboflavin synthase eubacterial/eukaryotic (EC 2.5.1.9)	Riboflavin, FMN and FAD metabolism; <br>Riboflavin synthesis cluster; <br>riboflavin to FAD
fig|6666666.563250.peg.1334	CDS	1	1612176	1613312	3	+	1137	4-hydroxythreonine-4-phosphate dehydrogenase (EC 1.1.1.262)	ECSIG4-SIG7; <br>Pyridoxin (Vitamin B6) Biosynthesis
fig|6666666.563250.peg.1335	CDS	1	1613494	1614039	1	+	546	FIG01269488: protein, clustered with ribosomal protein L32p	- none -
fig|6666666.563250.peg.1336	CDS	1	1614050	1614247	2	+	198	LSU ribosomal protein L32p @ LSU ribosomal protein L32p, zinc-independent	- none -
fig|6666666.563250.peg.1337	CDS	1	1614421	1615416	1	+	996	3-oxoacyl-[acyl-carrier-protein] synthase, KASIII (EC 2.3.1.180)	- none -
fig|6666666.563250.peg.1338	CDS	1	1615448	1615957	2	+	510	Biotin carboxyl carrier protein of acetyl-CoA carboxylase	Fatty Acid Biosynthesis FASII
fig|6666666.563250.peg.1339	CDS	1	1616047	1617390	1	+	1344	Biotin carboxylase of acetyl-CoA carboxylase (EC 6.3.4.14)	Fatty Acid Biosynthesis FASII
fig|6666666.563250.peg.1340	CDS	1	1617566	1617393	-2	-	174	hypothetical protein	- none -
fig|6666666.563250.peg.1341	CDS	1	1617601	1618269	1	+	669	hypothetical protein	- none -
fig|6666666.563250.peg.1342	CDS	1	1618283	1620010	2	+	1728	hypothetical protein	- none -
fig|6666666.563250.peg.1343	CDS	1	1620081	1621451	3	+	1371	hypothetical protein	- none -
fig|6666666.563250.peg.1344	CDS	1	1621411	1622523	1	+	1113	Oxidoreductase	- none -
fig|6666666.563250.peg.1345	CDS	1	1622700	1623374	3	+	675	Monofunctional biosynthetic peptidoglycan transglycosylase	- none -
fig|6666666.563250.peg.1346	CDS	1	1623377	1623835	2	+	459	hypothetical protein	- none -
fig|6666666.563250.peg.1347	CDS	1	1623994	1625037	1	+	1044	Hydrolase, alpha/beta fold family	- none -
fig|6666666.563250.peg.1348	CDS	1	1625396	1625043	-2	-	354	hypothetical protein	- none -
fig|6666666.563250.peg.1349	CDS	1	1627145	1625460	-2	-	1686	Single-stranded-DNA-specific exonuclease RecJ	- none -
fig|6666666.563250.peg.1350	CDS	1	1627281	1627871	3	+	591	Probable fusion protein	- none -
fig|6666666.563250.peg.1351	CDS	1	1628262	1627918	-3	-	345	hypothetical protein Sden_1896	- none -
fig|6666666.563250.peg.1352	CDS	1	1628863	1628288	-1	-	576	hypothetical protein	- none -
fig|6666666.563250.peg.1353	CDS	1	1629334	1628990	-1	-	345	Type III effector HopPmaJ	- none -
fig|6666666.563250.peg.1354	CDS	1	1630022	1629351	-2	-	672	16S rRNA (cytidine(1402)-2&#39;-O)-methyltransferase (EC 2.1.1.198)	- none -
fig|6666666.563250.peg.1355	CDS	1	1630391	1630026	-2	-	366	hypothetical protein	- none -
fig|6666666.563250.peg.1356	CDS	1	1631242	1630400	-1	-	843	hypothetical protein	- none -
fig|6666666.563250.peg.1357	CDS	1	1631429	1632076	2	+	648	Thymidine kinase (EC 2.7.1.21)	pyrimidine conversions
fig|6666666.563250.peg.1358	CDS	1	1632069	1633181	3	+	1113	Alanine racemase (EC 5.1.1.1)	Alanine biosynthesis; <br>Pyruvate Alanine Serine Interconversions
fig|6666666.563250.peg.1359	CDS	1	1633282	1633698	1	+	417	Large-conductance mechanosensitive channel	Potassium homeostasis
fig|6666666.563250.peg.1360	CDS	1	1633959	1634951	3	+	993	Aspartate-semialdehyde dehydrogenase (EC 1.2.1.11)	Lysine Biosynthesis DAP Pathway; <br>Lysine Biosynthesis DAP Pathway, GJO scratch; <br>Threonine and Homoserine Biosynthesis
fig|6666666.563250.peg.1361	CDS	1	1635110	1635481	2	+	372	hypothetical protein	- none -
fig|6666666.563250.peg.1362	CDS	1	1635671	1637839	2	+	2169	Prolyl endopeptidase (EC 3.4.21.26)	Serine endopeptidase (EC 3.4.21.-)
fig|6666666.563250.peg.1363	CDS	1	1637937	1638911	3	+	975	Putative iron-uptake ABC transport system ATP- binding protein	- none -
fig|6666666.563250.peg.1364	CDS	1	1639135	1639314	1	+	180	hypothetical protein	- none -
fig|6666666.563250.peg.1365	CDS	1	1639456	1639611	1	+	156	hypothetical protein	- none -
fig|6666666.563250.peg.1366	CDS	1	1640438	1639677	-2	-	762	UDP-2,3-diacylglucosamine diphosphatase (EC 3.6.1.54)	- none -
fig|6666666.563250.peg.1367	CDS	1	1640820	1640683	-3	-	138	hypothetical protein	- none -
fig|6666666.563250.peg.1368	CDS	1	1641617	1641165	-2	-	453	6-carboxy-5,6,7,8-tetrahydropterin synthase (EC 4.1.2.50)	- none -
fig|6666666.563250.peg.1369	CDS	1	1641755	1641657	-2	-	99	hypothetical protein	- none -
fig|6666666.563250.peg.1370	CDS	1	1642525	1641755	-1	-	771	Methylglutaconyl-CoA hydratase (EC 4.2.1.18)	- none -
fig|6666666.563250.peg.1371	CDS	1	1643882	1642557	-2	-	1326	DNA-damage-inducible protein F	- none -
fig|6666666.563250.peg.1372	CDS	1	1644956	1644279	-2	-	678	hypothetical protein	- none -
fig|6666666.563250.peg.1373	CDS	1	1645199	1644960	-2	-	240	hypothetical protein	- none -
fig|6666666.563250.peg.1374	CDS	1	1646473	1645898	-1	-	576	hypothetical protein	- none -
fig|6666666.563250.peg.1375	CDS	1	1648876	1646486	-1	-	2391	Outer membrane hemin receptor	- none -
fig|6666666.563250.peg.1376	CDS	1	1649228	1648941	-2	-	288	hypothetical protein	- none -
fig|6666666.563250.peg.1377	CDS	1	1650134	1649289	-2	-	846	Esterase/lipase/thioesterase family protein	- none -
fig|6666666.563250.peg.1378	CDS	1	1652866	1650131	-1	-	2736	hypothetical protein	- none -
fig|6666666.563250.peg.1379	CDS	1	1654329	1652938	-3	-	1392	Thrombospondin type 3 repeat:OmpA/MotB	- none -
fig|6666666.563250.peg.1380	CDS	1	1654374	1654487	3	+	114	hypothetical protein	- none -
fig|6666666.563250.peg.1381	CDS	1	1657764	1654615	-3	-	3150	ATP-dependent helicase	- none -
fig|6666666.563250.peg.1382	CDS	1	1657955	1658563	2	+	609	Superoxide dismutase [Mn] (EC 1.15.1.1)	Oxidative stress
fig|6666666.563250.peg.1383	CDS	1	1660727	1658829	-2	-	1899	Amidophosphoribosyltransferase (EC 2.4.2.14)	De Novo Purine Biosynthesis
fig|6666666.563250.peg.1384	CDS	1	1661712	1660786	-3	-	927	Ribokinase (EC 2.7.1.15)	D-ribose utilization; <br>Deoxyribose and Deoxynucleoside Catabolism
fig|6666666.563250.peg.1385	CDS	1	1662191	1663261	2	+	1071	hypothetical protein	- none -
fig|6666666.563250.peg.1386	CDS	1	1664027	1663392	-2	-	636	Ribonuclease HI-related protein 3	Ribonuclease H
fig|6666666.563250.peg.1387	CDS	1	1664609	1664034	-2	-	576	Phosphoribosylglycinamide formyltransferase (EC 2.1.2.2)	5-FCL-like protein; <br>De Novo Purine Biosynthesis
fig|6666666.563250.peg.1388	CDS	1	1664794	1665030	1	+	237	Acyl carrier protein	Fatty Acid Biosynthesis FASII
fig|6666666.563250.peg.1389	CDS	1	1665048	1666301	3	+	1254	3-oxoacyl-[acyl-carrier-protein] synthase, KASII (EC 2.3.1.179)	- none -
fig|6666666.563250.peg.1390	CDS	1	1666305	1667045	3	+	741	Ribonuclease III (EC 3.1.26.3)	CBSS-176299.4.peg.1292; <br>RNA processing and degradation, bacterial
fig|6666666.563250.peg.1391	CDS	1	1667208	1667699	3	+	492	hypothetical protein	- none -
fig|6666666.563250.peg.1392	CDS	1	1667699	1669126	2	+	1428	Pyruvate kinase (EC 2.7.1.40)	Pyruvate metabolism I: anaplerotic reactions, PEP
fig|6666666.563250.peg.1393	CDS	1	1673820	1669216	-3	-	4605	Chitinase (EC 3.2.1.14)	- none -
fig|6666666.563250.peg.1394	CDS	1	1675191	1674223	-3	-	969	hypothetical protein	- none -
fig|6666666.563250.peg.1395	CDS	1	1675311	1676525	3	+	1215	Ribosome LSU-associated GTP-binding protein HflX	- none -
fig|6666666.563250.peg.1396	CDS	1	1679048	1677246	-2	-	1803	phosphatidylserine decarboxylase	- none -
fig|6666666.563250.peg.1397	CDS	1	1680287	1679232	-2	-	1056	hypothetical protein	- none -
fig|6666666.563250.peg.1398	CDS	1	1680420	1683302	3	+	2883	Thiamin-regulated outer membrane receptor Omr1	Thiamin biosynthesis
fig|6666666.563250.peg.1399	CDS	1	1683318	1684733	3	+	1416	hypothetical protein	- none -
fig|6666666.563250.peg.1400	CDS	1	1684957	1685373	1	+	417	hypothetical protein	- none -
fig|6666666.563250.peg.1401	CDS	1	1685852	1685436	-2	-	417	Two-component transcriptional response regulator, LuxR family	- none -
fig|6666666.563250.peg.1402	CDS	1	1687315	1685864	-1	-	1452	Two-component hybrid sensor and regulator	- none -
fig|6666666.563250.peg.1403	CDS	1	1690320	1687468	-3	-	2853	Glycosyl hydrolase, BNR repeat precursor	- none -
fig|6666666.563250.peg.1404	CDS	1	1690642	1691880	1	+	1239	Xaa-Pro aminopeptidase (EC 3.4.11.9)	Aminopeptidases (EC 3.4.11.-)
fig|6666666.563250.peg.1405	CDS	1	1692169	1692552	1	+	384	Glyoxalase family protein	- none -
fig|6666666.563250.peg.1406	CDS	1	1693908	1692565	-3	-	1344	Cytochrome c peroxidase (EC 1.11.1.5)	- none -
fig|6666666.563250.peg.1407	CDS	1	1695580	1694306	-1	-	1275	Na(+)-dependent branched-chain amino acid transporter	- none -
fig|6666666.563250.peg.1408	CDS	1	1695617	1696393	2	+	777	Beta-ketoadipate enol-lactone hydrolase (EC 3.1.1.24)	Catechol branch of beta-ketoadipate pathway
fig|6666666.563250.peg.1409	CDS	1	1696575	1696820	3	+	246	hypothetical protein	- none -
fig|6666666.563250.peg.1410	CDS	1	1697886	1696840	-3	-	1047	Thiamine-monophosphate kinase (EC 2.7.4.16)	5-FCL-like protein; <br>Riboflavin synthesis cluster; <br>Thiamin biosynthesis
fig|6666666.563250.peg.1411	CDS	1	1698167	1699456	2	+	1290	FIG00930665: hypothetical protein	- none -
fig|6666666.563250.peg.1412	CDS	1	1699683	1699522	-3	-	162	hypothetical protein	- none -
fig|6666666.563250.peg.1413	CDS	1	1699723	1702425	1	+	2703	hypothetical protein	- none -
fig|6666666.563250.peg.1414	CDS	1	1702446	1703804	3	+	1359	hypothetical protein	- none -
fig|6666666.563250.peg.1415	CDS	1	1704032	1704793	2	+	762	hypothetical protein	- none -
fig|6666666.563250.peg.1416	CDS	1	1704880	1705926	1	+	1047	Probable cytochrome-c peroxidase (EC 1.11.1.5)	- none -
fig|6666666.563250.peg.1417	CDS	1	1706091	1706375	3	+	285	probable iron binding protein from the HesB_IscA_SufA family	Iron-sulfur cluster assembly
fig|6666666.563250.peg.1418	CDS	1	1706418	1707863	3	+	1446	Iron-sulfur cluster assembly protein SufB	Iron-sulfur cluster assembly
fig|6666666.563250.peg.1419	CDS	1	1707890	1708282	2	+	393	hypothetical protein	- none -
fig|6666666.563250.peg.1420	CDS	1	1708332	1709087	3	+	756	Iron-sulfur cluster assembly ATPase protein SufC	Iron-sulfur cluster assembly
fig|6666666.563250.peg.1421	CDS	1	1709087	1710400	2	+	1314	Iron-sulfur cluster assembly protein SufD	Iron-sulfur cluster assembly
fig|6666666.563250.peg.1422	CDS	1	1710509	1711723	2	+	1215	Cysteine desulfurase (EC 2.8.1.7) => SufS	- none -
fig|6666666.563250.peg.1423	CDS	1	1711901	1712146	2	+	246	hypothetical protein	- none -
fig|6666666.563250.peg.1424	CDS	1	1712393	1712773	2	+	381	hypothetical protein	- none -
fig|6666666.563250.peg.1425	CDS	1	1712957	1713442	2	+	486	hypothetical protein	- none -
fig|6666666.563250.peg.1426	CDS	1	1713474	1713896	3	+	423	Sulfur acceptor protein => iron-sulfur cluster assembly SufE	- none -
fig|6666666.563250.peg.1427	CDS	1	1713998	1714321	2	+	324	PaaD-like protein (DUF59) involved in Fe-S cluster assembly	Iron-sulfur cluster assembly
fig|6666666.563250.peg.1428	CDS	1	1714355	1714864	2	+	510	hypothetical protein	- none -
fig|6666666.563250.peg.1429	CDS	1	1715019	1715933	3	+	915	hypothetical protein	- none -
fig|6666666.563250.peg.1430	CDS	1	1716003	1717088	3	+	1086	hypothetical protein	- none -
fig|6666666.563250.peg.1431	CDS	1	1717382	1718818	2	+	1437	Cytochrome c family protein	- none -
fig|6666666.563250.peg.1432	CDS	1	1719023	1719532	2	+	510	hypothetical protein	- none -
fig|6666666.563250.peg.1433	CDS	1	1719677	1720273	2	+	597	hypothetical protein	- none -
fig|6666666.563250.peg.1434	CDS	1	1720278	1720829	3	+	552	GCN5-related N-acetyltransferase	- none -
fig|6666666.563250.peg.1435	CDS	1	1722004	1720931	-1	-	1074	hypothetical protein	- none -
fig|6666666.563250.peg.1436	CDS	1	1722131	1723006	2	+	876	Transcriptional regulator, LysR family	- none -
fig|6666666.563250.peg.1437	CDS	1	1723379	1723098	-2	-	282	hypothetical protein	- none -
fig|6666666.563250.peg.1438	CDS	1	1723719	1723435	-3	-	285	hypothetical protein	- none -
fig|6666666.563250.peg.1439	CDS	1	1725665	1723830	-2	-	1836	Sodium/hydrogen exchanger family protein	- none -
fig|6666666.563250.peg.1440	CDS	1	1726163	1726044	-2	-	120	hypothetical protein	- none -
fig|6666666.563250.peg.1441	CDS	1	1726209	1727069	3	+	861	MBL-fold metallo-hydrolase superfamily	- none -
fig|6666666.563250.peg.1442	CDS	1	1727075	1728751	2	+	1677	Protease precursor	- none -
fig|6666666.563250.peg.1443	CDS	1	1728767	1730605	2	+	1839	Zn-dependent aminopeptidase	- none -
fig|6666666.563250.peg.1444	CDS	1	1730850	1731227	3	+	378	Ribonuclease P protein component (EC 3.1.26.5)	tRNA processing
fig|6666666.563250.peg.1445	CDS	1	1731277	1732911	1	+	1635	Carboxy-terminal processing protease	- none -
fig|6666666.563250.peg.1446	CDS	1	1733488	1733036	-1	-	453	N-acetyltransferase ElaA	- none -
fig|6666666.563250.peg.1447	CDS	1	1733925	1733494	-3	-	432	Ribose-5-phosphate isomerase B (EC 5.3.1.6)	- none -
fig|6666666.563250.peg.1448	CDS	1	1734331	1734224	-1	-	108	hypothetical protein	- none -
fig|6666666.563250.peg.1449	CDS	1	1734580	1734702	1	+	123	hypothetical protein	- none -
fig|6666666.563250.peg.1450	CDS	1	1734964	1734725	-1	-	240	hypothetical protein	- none -
fig|6666666.563250.peg.1451	CDS	1	1735280	1735101	-2	-	180	hypothetical protein	- none -
fig|6666666.563250.peg.1452	CDS	1	1735525	1737729	1	+	2205	3&#39;-to-5&#39; exoribonuclease RNase R	RNA processing and degradation, bacterial
fig|6666666.563250.peg.1453	CDS	1	1737834	1738511	3	+	678	hypothetical protein	- none -
fig|6666666.563250.peg.1454	CDS	1	1738551	1739234	3	+	684	hypothetical protein	- none -
fig|6666666.563250.peg.1455	CDS	1	1739760	1739404	-3	-	357	Dihydroneopterin aldolase (EC 4.1.2.25)	Folate Biosynthesis; <br>Folate biosynthesis cluster
fig|6666666.563250.peg.1456	CDS	1	1740103	1739852	-1	-	252	hypothetical protein	- none -
fig|6666666.563250.peg.1457	CDS	1	1740221	1742257	2	+	2037	Glutaminyl-tRNA synthetase (EC 6.1.1.18)	tRNA aminoacylation, Glu and Gln
fig|6666666.563250.peg.1458	CDS	1	1744054	1743092	-1	-	963	Protein QmcA (possibly involved in integral membrane quality control)	- none -
fig|6666666.563250.peg.1459	CDS	1	1745724	1744210	-3	-	1515	Glutamyl-tRNA synthetase (EC 6.1.1.17)	Heme and Siroheme Biosynthesis; <br>tRNA aminoacylation, Glu and Gln
fig|6666666.563250.peg.1460	CDS	1	1746860	1745805	-2	-	1056	Alkane-1 monooxygenase (EC 1.14.15.3)	- none -
fig|6666666.563250.peg.1461	CDS	1	1746962	1750357	2	+	3396	liver stage antigen, putative	- none -
fig|6666666.563250.peg.1462	CDS	1	1750350	1750769	3	+	420	Metal-dependent hydrolase YbeY, involved in rRNA and/or ribosome maturation and assembly	CBSS-56780.10.peg.1536; <br>Glycyl-tRNA synthetase containing cluster
fig|6666666.563250.peg.1463	CDS	1	1750890	1752761	3	+	1872	tRNA-5-carboxymethylaminomethyl-2-thiouridine(34) synthesis protein MnmG	- none -
fig|6666666.563250.peg.1464	CDS	1	1752918	1753772	3	+	855	SAM-dependent methyltransferase BT3209	- none -
fig|6666666.563250.peg.1465	CDS	1	1753948	1754478	1	+	531	hypothetical protein	- none -
fig|6666666.563250.peg.1466	CDS	1	1755021	1757057	3	+	2037	hypothetical protein	- none -
fig|6666666.563250.peg.1467	CDS	1	1757061	1759766	3	+	2706	hypothetical protein	- none -
fig|6666666.563250.peg.1468	CDS	1	1759759	1760847	1	+	1089	Phage protein	- none -
fig|6666666.563250.peg.1469	CDS	1	1760899	1771437	1	+	10539	hypothetical protein	- none -
fig|6666666.563250.peg.1470	CDS	1	1771443	1772402	3	+	960	hypothetical protein	- none -
fig|6666666.563250.peg.1471	CDS	1	1773446	1772562	-2	-	885	Putative lipase	- none -
fig|6666666.563250.peg.1472	CDS	1	1774104	1773706	-3	-	399	FIG00649449: hypothetical protein	- none -
fig|6666666.563250.peg.1473	CDS	1	1775272	1774118	-1	-	1155	DNA polymerase III delta prime subunit (EC 2.7.7.7)	- none -
fig|6666666.563250.peg.1474	CDS	1	1775718	1776905	3	+	1188	Phosphoglycerate kinase (EC 2.7.2.3)	- none -
fig|6666666.563250.peg.1475	CDS	1	1777321	1778883	1	+	1563	Membrane-bound lytic murein transglycosylase D	- none -
fig|6666666.563250.peg.1476	CDS	1	1778880	1779887	3	+	1008	hypothetical protein	- none -
fig|6666666.563250.peg.1477	CDS	1	1779978	1782104	3	+	2127	Transcription accessory protein (S1 RNA-binding domain)	Cell division-ribosomal stress proteins cluster; <br>Transcription factors bacterial
fig|6666666.563250.peg.1478	CDS	1	1782742	1782551	-1	-	192	Twin-arginine translocation protein TatA	Cluster-based Subsystem Grouping Hypotheticals - perhaps Proteosome Related; <br>Twin-arginine translocation system
fig|6666666.563250.peg.1479	CDS	1	1782918	1782754	-3	-	165	hypothetical protein	- none -
fig|6666666.563250.peg.1480	CDS	1	1782994	1783863	1	+	870	Lipoprotein NlpD precursor	- none -
fig|6666666.563250.peg.1481	CDS	1	1783866	1785368	3	+	1503	putative auxin-regulated protein	- none -
fig|6666666.563250.peg.1482	CDS	1	1785394	1787085	1	+	1692	hypothetical protein	- none -
fig|6666666.563250.peg.1483	CDS	1	1787116	1788141	1	+	1026	dTDP-glucose 4,6-dehydratase (EC 4.2.1.46)	Rhamnose containing glycans; <br>dTDP-rhamnose synthesis
fig|6666666.563250.peg.1484	CDS	1	1788259	1789116	1	+	858	Glucose-1-phosphate thymidylyltransferase (EC 2.7.7.24)	Rhamnose containing glycans; <br>dTDP-rhamnose synthesis
fig|6666666.563250.peg.1485	CDS	1	1789127	1789681	2	+	555	dTDP-4-dehydrorhamnose 3,5-epimerase (EC 5.1.3.13)	Rhamnose containing glycans; <br>dTDP-rhamnose synthesis
fig|6666666.563250.peg.1486	CDS	1	1789749	1790786	3	+	1038	hypothetical protein	- none -
fig|6666666.563250.peg.1487	CDS	1	1790793	1791650	3	+	858	dTDP-4-dehydrorhamnose reductase (EC 1.1.1.133)	Rhamnose containing glycans; <br>dTDP-rhamnose synthesis
fig|6666666.563250.peg.1488	CDS	1	1791637	1792911	1	+	1275	UDP-N-acetyl-D-glucosamine 6-dehydrogenase (EC 1.1.1.136)	- none -
fig|6666666.563250.peg.1489	CDS	1	1792952	1794289	2	+	1338	hypothetical protein	- none -
fig|6666666.563250.peg.1490	CDS	1	1794265	1795659	1	+	1395	hypothetical protein	- none -
fig|6666666.563250.peg.1491	CDS	1	1795653	1797059	3	+	1407	hypothetical protein	- none -
fig|6666666.563250.peg.1492	CDS	1	1797060	1798148	3	+	1089	hypothetical protein	- none -
fig|6666666.563250.peg.1493	CDS	1	1798200	1799159	3	+	960	hypothetical protein	- none -
fig|6666666.563250.peg.1494	CDS	1	1799186	1799932	2	+	747	Putative N-acetylgalactosaminyl-diphosphoundecaprenol glucuronosyltransferase	Teichuronic acid biosynthesis
fig|6666666.563250.peg.1495	CDS	1	1799979	1801349	3	+	1371	sugar transferase	- none -
fig|6666666.563250.peg.1496	CDS	1	1801401	1802822	3	+	1422	UDP-glucose 6-dehydrogenase (EC 1.1.1.22)	Lipid A-Ara4N pathway ( Polymyxin resistance )
fig|6666666.563250.peg.1497	CDS	1	1802871	1803857	3	+	987	UDP-glucuronate decarboxylase (EC 4.1.1.35)	- none -
fig|6666666.563250.peg.1498	CDS	1	1803872	1805182	2	+	1311	hypothetical protein	- none -
fig|6666666.563250.peg.1499	CDS	1	1805237	1806508	2	+	1272	Phosphoribosylamine--glycine ligase (EC 6.3.4.13)	De Novo Purine Biosynthesis
fig|6666666.563250.peg.1500	CDS	1	1806894	1806664	-3	-	231	hypothetical protein	- none -
fig|6666666.563250.peg.1501	CDS	1	1807001	1807918	2	+	918	hypothetical protein	- none -
fig|6666666.563250.peg.1502	CDS	1	1808183	1808791	2	+	609	hypothetical protein	- none -
fig|6666666.563250.peg.1503	CDS	1	1808819	1809868	2	+	1050	ADP-heptose:LPS heptosyltransferase	- none -
fig|6666666.563250.peg.1504	CDS	1	1811003	1809951	-2	-	1053	Flavodoxin reductases (ferredoxin-NADPH reductases) family 1	Anaerobic respiratory reductases
fig|6666666.563250.peg.1505	CDS	1	1811254	1812726	1	+	1473	hypothetical protein	- none -
fig|6666666.563250.peg.1506	CDS	1	1812731	1813426	2	+	696	ATP-binding protein	- none -
fig|6666666.563250.peg.1507	CDS	1	1813958	1816540	2	+	2583	TPR domain protein	- none -
fig|6666666.563250.peg.1508	CDS	1	1816557	1816976	3	+	420	Polymer-forming bactofilin	- none -
fig|6666666.563250.peg.1509	CDS	1	1817011	1817172	1	+	162	hypothetical protein	- none -
fig|6666666.563250.peg.1510	CDS	1	1817472	1817909	3	+	438	hypothetical protein	- none -
fig|6666666.563250.peg.1511	CDS	1	1818029	1819126	2	+	1098	ATP synthase F0 sector subunit a (EC 3.6.3.14)	F0F1-type ATP synthase
fig|6666666.563250.peg.1512	CDS	1	1819176	1819367	3	+	192	ATP synthase F0 sector subunit c (EC 3.6.3.14)	F0F1-type ATP synthase
fig|6666666.563250.peg.1513	CDS	1	1819464	1819964	3	+	501	ATP synthase F0 sector subunit b (EC 3.6.3.14)	F0F1-type ATP synthase
fig|6666666.563250.peg.1514	CDS	1	1819974	1820501	3	+	528	ATP synthase delta chain (EC 3.6.3.14)	F0F1-type ATP synthase
fig|6666666.563250.peg.1515	CDS	1	1820586	1822163	3	+	1578	ATP synthase alpha chain (EC 3.6.3.14)	F0F1-type ATP synthase
fig|6666666.563250.peg.1516	CDS	1	1822221	1823084	3	+	864	ATP synthase gamma chain (EC 3.6.3.14)	F0F1-type ATP synthase
fig|6666666.563250.peg.1517	CDS	1	1823231	1824016	2	+	786	hypothetical protein	- none -
fig|6666666.563250.peg.1518	CDS	1	1824772	1824188	-1	-	585	cAMP-binding proteins - catabolite gene activator and regulatory subunit of cAMP-dependent protein kinases	cAMP signaling in bacteria
fig|6666666.563250.peg.1519	CDS	1	1825129	1825611	1	+	483	hypothetical protein	- none -
fig|6666666.563250.peg.1520	CDS	1	1825648	1827102	1	+	1455	Polysaccharide biosynthesis protein	- none -
fig|6666666.563250.peg.1521	CDS	1	1827195	1827629	3	+	435	Deoxyuridine 5&#39;-triphosphate nucleotidohydrolase (EC 3.6.1.23)	Housecleaning nucleoside triphosphate pyrophosphatases; <br>Nudix proteins (nucleoside triphosphate hydrolases)
fig|6666666.563250.peg.1522	CDS	1	1827749	1828765	2	+	1017	Glucose-1-phosphate thymidylyltransferase (EC 2.7.7.24)	Rhamnose containing glycans; <br>dTDP-rhamnose synthesis
fig|6666666.563250.peg.1523	CDS	1	1828829	1830172	2	+	1344	TPR domain protein	- none -
fig|6666666.563250.peg.1524	CDS	1	1830180	1830950	3	+	771	hypothetical protein	- none -
fig|6666666.563250.peg.1525	CDS	1	1830986	1832176	2	+	1191	Murein hydrolase activator EnvC	- none -
fig|6666666.563250.peg.1526	CDS	1	1832644	1833114	1	+	471	hypothetical protein	- none -
fig|6666666.563250.peg.1527	CDS	1	1833138	1833833	3	+	696	Transcriptional regulator, ArsR family	- none -
fig|6666666.563250.peg.1528	CDS	1	1834473	1833949	-3	-	525	Acyl-CoA hydrolase (EC 3.1.2.20)	- none -
fig|6666666.563250.peg.1529	CDS	1	1835649	1834696	-3	-	954	hypothetical protein	- none -
fig|6666666.563250.peg.1530	CDS	1	1835878	1836954	1	+	1077	Rossmann fold nucleotide-binding protein Smf possibly involved in DNA uptake	CBSS-272943.3.peg.1367
fig|6666666.563250.peg.1531	CDS	1	1837874	1836951	-2	-	924	hypothetical protein	- none -
fig|6666666.563250.peg.1532	CDS	1	1838987	1837890	-2	-	1098	hypothetical protein	- none -
fig|6666666.563250.peg.1533	CDS	1	1839869	1839021	-2	-	849	3-mercaptopyruvate sulfurtransferase (EC 2.8.1.2)	- none -
fig|6666666.563250.peg.1534	CDS	1	1840353	1839901	-3	-	453	Ketosteroid isomerase-related protein	- none -
fig|6666666.563250.peg.1535	CDS	1	1841395	1840400	-1	-	996	Glycerol-3-phosphate dehydrogenase [NAD(P)+] (EC 1.1.1.94)	- none -
fig|6666666.563250.peg.1536	CDS	1	1841603	1842520	2	+	918	hypothetical protein	- none -
fig|6666666.563250.peg.1537	CDS	1	1842743	1843276	2	+	534	3-hydroxyanthranilate 3,4-dioxygenase (EC 1.13.11.6)	NAD and NADP cofactor biosynthesis global
fig|6666666.563250.peg.1538	CDS	1	1845837	1843363	-3	-	2475	hypothetical protein	- none -
fig|6666666.563250.peg.1539	CDS	1	1846131	1847684	3	+	1554	Aldehyde dehydrogenase B (EC 1.2.1.22)	Methylglyoxal Metabolism
fig|6666666.563250.peg.1540	CDS	1	1847949	1851608	3	+	3660	hypothetical protein	- none -
fig|6666666.563250.peg.1541	CDS	1	1851736	1852179	1	+	444	hypothetical protein	- none -
fig|6666666.563250.peg.1542	CDS	1	1853405	1852302	-2	-	1104	hypothetical protein	- none -
fig|6666666.563250.peg.1543	CDS	1	1854740	1853832	-2	-	909	hypothetical protein	- none -
fig|6666666.563250.peg.1544	CDS	1	1856322	1855309	-3	-	1014	Primosomal protein N&#39; (replication factor Y) - superfamily II helicase	- none -
fig|6666666.563250.peg.1545	CDS	1	1856459	1856343	-2	-	117	hypothetical protein	- none -
fig|6666666.563250.peg.1546	CDS	1	1857612	1856467	-3	-	1146	hypothetical protein	- none -
fig|6666666.563250.peg.1547	CDS	1	1858442	1857714	-2	-	729	Serine/threonine protein phosphatase (EC 3.1.3.16)	- none -
fig|6666666.563250.peg.1548	CDS	1	1859972	1858452	-2	-	1521	Spermidine synthase N-terminal extension / Spermidine synthase (EC 2.5.1.16)	Polyamine Metabolism
fig|6666666.563250.peg.1549	CDS	1	1860023	1860586	2	+	564	hypothetical protein	- none -
fig|6666666.563250.peg.1550	CDS	1	1860549	1861730	3	+	1182	hypothetical protein	- none -
fig|6666666.563250.peg.1551	CDS	1	1862138	1861767	-2	-	372	S-adenosylmethionine decarboxylase proenzyme (EC 4.1.1.50), prokaryotic class 1B	Polyamine Metabolism
fig|6666666.563250.peg.1552	CDS	1	1862708	1862172	-2	-	537	hypothetical protein	- none -
fig|6666666.563250.peg.1553	CDS	1	1863898	1862762	-1	-	1137	hypothetical protein	- none -
fig|6666666.563250.peg.1554	CDS	1	1864737	1863982	-3	-	756	Oxidoreductase, short-chain dehydrogenase/reductase family	- none -
fig|6666666.563250.peg.1555	CDS	1	1865063	1866064	2	+	1002	MoxR-like ATPase in aerotolerance operon	Aerotolerance operon in Bacteroides and potentially orthologous operons in other organisms
fig|6666666.563250.peg.1556	CDS	1	1866136	1867002	1	+	867	hypothetical protein PA3071	Aerotolerance operon in Bacteroides and potentially orthologous operons in other organisms
fig|6666666.563250.peg.1557	CDS	1	1867012	1868661	1	+	1650	FIG00936810: hypothetical protein	- none -
fig|6666666.563250.peg.1558	CDS	1	1868664	1869668	3	+	1005	Aerotolerance protein BatA	- none -
fig|6666666.563250.peg.1559	CDS	1	1869793	1870827	1	+	1035	Aerotolerance protein BatB	- none -
fig|6666666.563250.peg.1560	CDS	1	1870865	1871746	2	+	882	Aerotolerance protein BatC	- none -
fig|6666666.563250.peg.1561	CDS	1	1871909	1873678	2	+	1770	Aerotolerance protein BatD	- none -
fig|6666666.563250.peg.1562	CDS	1	1873693	1874445	1	+	753	Aerotolerance protein BatE	- none -
fig|6666666.563250.peg.1563	CDS	1	1874509	1874838	1	+	330	hypothetical protein	- none -
fig|6666666.563250.peg.1564	CDS	1	1874995	1876578	1	+	1584	Na(+)-dependent bicarbonate transporter BicA	- none -
fig|6666666.563250.peg.1565	CDS	1	1876587	1877225	3	+	639	Carbonic anhydrase, beta class (EC 4.2.1.1)	- none -
fig|6666666.563250.peg.1566	CDS	1	1877386	1879233	1	+	1848	Na(+)-dependent bicarbonate transporter BicA	- none -
fig|6666666.563250.peg.1567	CDS	1	1879784	1879275	-2	-	510	hypothetical protein	- none -
fig|6666666.563250.peg.1568	CDS	1	1879869	1880111	3	+	243	hypothetical protein	- none -
fig|6666666.563250.peg.1569	CDS	1	1880116	1880391	1	+	276	hypothetical protein	- none -
fig|6666666.563250.peg.1570	CDS	1	1883026	1880405	-1	-	2622	hypothetical protein	- none -
fig|6666666.563250.peg.1571	CDS	1	1884638	1883736	-2	-	903	Putative anti-sigma factor	- none -
fig|6666666.563250.peg.1572	CDS	1	1885346	1884834	-2	-	513	RNA polymerase ECF-type sigma factor	- none -
fig|6666666.563250.peg.1573	CDS	1	1885451	1886983	2	+	1533	hypothetical protein	- none -
fig|6666666.563250.peg.1574	CDS	1	1887406	1888287	1	+	882	FIG002781: Alpha-L-glutamate ligase family protein	- none -
fig|6666666.563250.peg.1575	CDS	1	1888312	1889442	1	+	1131	hypothetical protein	- none -
fig|6666666.563250.peg.1576	CDS	1	1889515	1889871	1	+	357	hypothetical protein	- none -
fig|6666666.563250.peg.1577	CDS	1	1890059	1891078	2	+	1020	Phenylalanyl-tRNA synthetase alpha chain (EC 6.1.1.20)	tRNA aminoacylation, Phe
fig|6666666.563250.peg.1578	CDS	1	1891115	1891510	2	+	396	FIG00907129: hypothetical protein	- none -
fig|6666666.563250.peg.1579	CDS	1	1892162	1891734	-2	-	429	hypothetical protein	- none -
fig|6666666.563250.peg.1580	CDS	1	1893283	1892381	-1	-	903	hypothetical protein	- none -
fig|6666666.563250.peg.1581	CDS	1	1893561	1894013	3	+	453	hypothetical protein	- none -
fig|6666666.563250.peg.1582	CDS	1	1894633	1894190	-1	-	444	hypothetical protein	- none -
fig|6666666.563250.peg.1583	CDS	1	1898646	1894630	-3	-	4017	Multidomain signal transduction protein including CheB-like methylesterase, CheR-like methyltransferase and BaeS-like histidine kinase	- none -
fig|6666666.563250.peg.1584	CDS	1	1900009	1899041	-1	-	969	Tryptophanyl-tRNA synthetase (EC 6.1.1.2)	tRNA aminoacylation, Trp
fig|6666666.563250.peg.1585	CDS	1	1900137	1900844	3	+	708	Acyl-CoA:1-acyl-sn-glycerol-3-phosphate acyltransferase (EC 2.3.1.51)	- none -
fig|6666666.563250.peg.1586	CDS	1	1902319	1900841	-1	-	1479	hypothetical protein	- none -
fig|6666666.563250.peg.1587	CDS	1	1902867	1902316	-3	-	552	RNA polymerase ECF-type sigma factor	- none -
fig|6666666.563250.peg.1588	CDS	1	1903329	1902880	-3	-	450	hypothetical protein	- none -
fig|6666666.563250.peg.1589	CDS	1	1904445	1903432	-3	-	1014	RecA protein	DNA repair, bacterial; <br>DNA repair, bacterial RecFOR pathway; <br>DNA repair system including RecA, MutS and a hypothetical protein; <br>RecA and RecX
fig|6666666.563250.peg.1590	CDS	1	1904974	1906005	1	+	1032	Rhodanese domain protein, Enterobacterial subgroup, YceA homolog	Single-Rhodanese-domain proteins
fig|6666666.563250.peg.1591	CDS	1	1906155	1907456	3	+	1302	Stage 0 sporulation protein YaaT	- none -
fig|6666666.563250.peg.1592	CDS	1	1907443	1907937	1	+	495	GldH	- none -
fig|6666666.563250.peg.1593	CDS	1	1907942	1910272	2	+	2331	Monofunctional biosynthetic peptidoglycan transglycosylase	- none -
fig|6666666.563250.peg.1594	CDS	1	1910363	1911061	2	+	699	Succinyl-CoA:3-ketoacid-coenzyme A transferase subunit A (EC 2.8.3.5)	Catechol branch of beta-ketoadipate pathway
fig|6666666.563250.peg.1595	CDS	1	1911123	1911764	3	+	642	Alkyl hydroperoxide reductase subunit C-like protein	Oxidative stress; <br>Thioredoxin-disulfide reductase
fig|6666666.563250.peg.1596	CDS	1	1911776	1912486	2	+	711	Succinyl-CoA:3-ketoacid-coenzyme A transferase subunit B (EC 2.8.3.5)	Catechol branch of beta-ketoadipate pathway
fig|6666666.563250.peg.1597	CDS	1	1912769	1912882	2	+	114	hypothetical protein	- none -
fig|6666666.563250.peg.1598	CDS	1	1914667	1912976	-1	-	1692	Dipeptide ABC transporter, ATP-binding protein DppD (TC 3.A.1.5.2)	- none -
fig|6666666.563250.peg.1599	CDS	1	1914775	1916232	1	+	1458	Nitrogen regulation protein NtrY (EC 2.7.3.-)	- none -
fig|6666666.563250.peg.1600	CDS	1	1916437	1917216	1	+	780	Enoyl-CoA hydratase (EC 4.2.1.17)	Acetyl-CoA fermentation to Butyrate; <br>Butanol Biosynthesis; <br>Butyrate metabolism cluster; <br>Fatty acid metabolism cluster; <br>Isoleucine degradation; <br>Polyhydroxybutyrate metabolism; <br>Valine degradation
fig|6666666.563250.peg.1601	CDS	1	1917937	1917347	-1	-	591	Nicotinate-nucleotide adenylyltransferase (EC 2.7.7.18)	NAD and NADP cofactor biosynthesis global
fig|6666666.563250.peg.1602	CDS	1	1918526	1917951	-2	-	576	Guanylate kinase (EC 2.7.4.8)	Purine conversions
fig|6666666.563250.peg.1603	CDS	1	1919419	1918574	-1	-	846	UPF0701 protein YicC	- none -
fig|6666666.563250.peg.1604	CDS	1	1920143	1919571	-2	-	573	Protoporphyrinogen IX oxidase, novel form, HemJ (EC 1.3.-.-)	Heme and Siroheme Biosynthesis
fig|6666666.563250.peg.1605	CDS	1	1921589	1920198	-2	-	1392	Multi antimicrobial extrusion protein (Na(+)/drug antiporter), MATE family of MDR efflux pumps	Multidrug Resistance Efflux Pumps
fig|6666666.563250.peg.1606	CDS	1	1922624	1921602	-2	-	1023	Ferrochelatase, protoheme ferro-lyase (EC 4.99.1.1)	Heme and Siroheme Biosynthesis
fig|6666666.563250.peg.1607	CDS	1	1922845	1923009	1	+	165	hypothetical protein	- none -
fig|6666666.563250.peg.1608	CDS	1	1924001	1923111	-2	-	891	Transcriptional regulator, AraC family	- none -
fig|6666666.563250.peg.1609	CDS	1	1924207	1925457	1	+	1251	Glutamyl-tRNA reductase (EC 1.2.1.70)	Heme and Siroheme Biosynthesis
fig|6666666.563250.peg.1610	CDS	1	1925460	1926380	3	+	921	Porphobilinogen deaminase (EC 2.5.1.61)	Heme and Siroheme Biosynthesis
fig|6666666.563250.peg.1611	CDS	1	1926377	1927045	2	+	669	Uroporphyrinogen-III synthase, divergent, Flavobacterial type (EC 4.2.1.75)	Heme and Siroheme Biosynthesis
fig|6666666.563250.peg.1612	CDS	1	1927103	1928131	2	+	1029	Uroporphyrinogen III decarboxylase (EC 4.1.1.37)	Heme and Siroheme Biosynthesis
fig|6666666.563250.peg.1613	CDS	1	1928215	1928991	1	+	777	hypothetical protein	- none -
fig|6666666.563250.peg.1614	CDS	1	1928988	1929890	3	+	903	Coproporphyrinogen III oxidase, aerobic (EC 1.3.3.3)	Heme and Siroheme Biosynthesis
fig|6666666.563250.peg.1615	CDS	1	1930049	1930450	2	+	402	hypothetical protein	- none -
fig|6666666.563250.peg.1616	CDS	1	1931815	1930439	-1	-	1377	hypothetical protein	- none -
fig|6666666.563250.peg.1617	CDS	1	1932398	1932751	2	+	354	hypothetical protein	- none -
fig|6666666.563250.peg.1618	CDS	1	1932821	1933513	2	+	693	hypothetical protein	- none -
fig|6666666.563250.peg.1619	CDS	1	1933528	1934475	1	+	948	hypothetical protein	- none -
fig|6666666.563250.peg.1620	CDS	1	1936046	1934556	-2	-	1491	hypothetical protein	- none -
fig|6666666.563250.peg.1621	CDS	1	1939851	1936249	-3	-	3603	putative membrane protein	- none -
fig|6666666.563250.peg.1622	CDS	1	1940833	1939946	-1	-	888	ATPase component of general energizing module of ECF transporters	- none -
fig|6666666.563250.peg.1623	CDS	1	1940998	1941972	1	+	975	Porphobilinogen synthase (EC 4.2.1.24)	Heme and Siroheme Biosynthesis
fig|6666666.563250.peg.1624	CDS	1	1942162	1943268	1	+	1107	DNA alkylation repair enzyme	- none -
fig|6666666.563250.peg.1625	CDS	1	1943379	1944563	3	+	1185	hypothetical protein	- none -
fig|6666666.563250.peg.1626	CDS	1	1944599	1945033	2	+	435	hypothetical protein	- none -
fig|6666666.563250.peg.1627	CDS	1	1945102	1945605	1	+	504	hypothetical protein	- none -
fig|6666666.563250.peg.1628	CDS	1	1946672	1945674	-2	-	999	hypothetical protein	- none -
fig|6666666.563250.peg.1629	CDS	1	1947172	1947747	1	+	576	hypothetical protein	- none -
fig|6666666.563250.peg.1630	CDS	1	1947884	1948996	2	+	1113	Hemolysin	- none -
fig|6666666.563250.peg.1631	CDS	1	1948996	1949472	1	+	477	Methylated-DNA--protein-cysteine methyltransferase (EC 2.1.1.63)	DNA repair, bacterial
fig|6666666.563250.peg.1632	CDS	1	1949578	1950744	1	+	1167	Beta-lactamase class C-like and penicillin binding proteins (PBPs) superfamily	- none -
fig|6666666.563250.peg.1633	CDS	1	1950728	1951441	2	+	714	hypothetical protein	- none -
fig|6666666.563250.peg.1634	CDS	1	1954978	1951511	-1	-	3468	hypothetical protein	- none -
fig|6666666.563250.peg.1635	CDS	1	1959040	1955591	-1	-	3450	Glycosyl hydrolase, BNR repeat precursor	- none -
fig|6666666.563250.peg.1636	CDS	1	1959727	1959542	-1	-	186	hypothetical protein	- none -
fig|6666666.563250.peg.1637	CDS	1	1959932	1959717	-2	-	216	hypothetical protein	- none -
fig|6666666.563250.peg.1638	CDS	1	1960486	1960644	1	+	159	hypothetical protein	- none -
fig|6666666.563250.peg.1639	CDS	1	1960661	1961443	2	+	783	hypothetical protein	- none -
fig|6666666.563250.peg.1640	CDS	1	1961447	1961692	2	+	246	hypothetical protein	- none -
fig|6666666.563250.peg.1641	CDS	1	1962137	1961709	-2	-	429	hypothetical protein	- none -
fig|6666666.563250.peg.1642	CDS	1	1962249	1962458	3	+	210	hypothetical protein	- none -
fig|6666666.563250.peg.1643	CDS	1	1962465	1964495	3	+	2031	hypothetical protein	- none -
fig|6666666.563250.peg.1644	CDS	1	1964492	1964647	2	+	156	hypothetical protein	- none -
fig|6666666.563250.peg.1645	CDS	1	1964650	1965534	1	+	885	hypothetical protein	- none -
fig|6666666.563250.peg.1646	CDS	1	1965534	1966175	3	+	642	hypothetical protein	- none -
fig|6666666.563250.peg.1647	CDS	1	1966451	1966927	2	+	477	hypothetical protein	- none -
fig|6666666.563250.peg.1648	CDS	1	1967036	1967245	2	+	210	hypothetical protein	- none -
fig|6666666.563250.peg.1649	CDS	1	1967242	1967925	1	+	684	hypothetical protein	- none -
fig|6666666.563250.peg.1650	CDS	1	1967922	1968104	3	+	183	hypothetical protein	- none -
fig|6666666.563250.peg.1651	CDS	1	1968154	1968384	1	+	231	hypothetical protein	- none -
fig|6666666.563250.peg.1652	CDS	1	1968381	1968521	3	+	141	hypothetical protein	- none -
fig|6666666.563250.peg.1653	CDS	1	1968518	1968736	2	+	219	hypothetical protein	- none -
fig|6666666.563250.peg.1654	CDS	1	1968727	1969038	1	+	312	hypothetical protein	- none -
fig|6666666.563250.peg.1655	CDS	1	1969039	1969479	1	+	441	hypothetical protein	- none -
fig|6666666.563250.peg.1656	CDS	1	1969495	1969617	1	+	123	hypothetical protein	- none -
fig|6666666.563250.peg.1657	CDS	1	1969611	1969829	3	+	219	hypothetical protein	- none -
fig|6666666.563250.peg.1658	CDS	1	1969836	1970705	3	+	870	DNA-cytosine methyltransferase (EC 2.1.1.37)	DNA repair, bacterial
fig|6666666.563250.peg.1659	CDS	1	1970765	1970941	2	+	177	hypothetical protein	- none -
fig|6666666.563250.peg.1660	CDS	1	1970981	1971286	2	+	306	hypothetical protein	- none -
fig|6666666.563250.peg.1661	CDS	1	1971315	1971542	3	+	228	hypothetical protein	- none -
fig|6666666.563250.peg.1662	CDS	1	1971619	1971921	1	+	303	hypothetical protein	- none -
fig|6666666.563250.peg.1663	CDS	1	1973362	1972238	-1	-	1125	Phage virion morphogenesis protein Mup30, F	- none -
fig|6666666.563250.peg.1664	CDS	1	1974561	1973374	-3	-	1188	hypothetical protein	- none -
fig|6666666.563250.peg.1665	CDS	1	1975056	1974565	-3	-	492	hypothetical protein	- none -
fig|6666666.563250.peg.1666	CDS	1	1975463	1975053	-2	-	411	hypothetical protein	- none -
fig|6666666.563250.peg.1667	CDS	1	1975914	1975453	-3	-	462	hypothetical protein	- none -
fig|6666666.563250.peg.1668	CDS	1	1977476	1975920	-2	-	1557	hypothetical protein	- none -
fig|6666666.563250.peg.1669	CDS	1	1977976	1977473	-1	-	504	hypothetical protein	- none -
fig|6666666.563250.peg.1670	CDS	1	1978273	1977992	-1	-	282	hypothetical protein	- none -
fig|6666666.563250.peg.1671	CDS	1	1978447	1979466	1	+	1020	hypothetical protein	- none -
fig|6666666.563250.peg.1672	CDS	1	1979487	1980335	3	+	849	hypothetical protein	- none -
fig|6666666.563250.peg.1673	CDS	1	1980342	1980569	3	+	228	hypothetical protein	- none -
fig|6666666.563250.peg.1674	CDS	1	1980642	1981091	3	+	450	hypothetical protein	- none -
fig|6666666.563250.peg.1675	CDS	1	1981094	1982620	2	+	1527	hypothetical protein	- none -
fig|6666666.563250.peg.1676	CDS	1	1982633	1983061	2	+	429	hypothetical protein	- none -
fig|6666666.563250.peg.1677	CDS	1	1983133	1983435	1	+	303	hypothetical protein	- none -
fig|6666666.563250.peg.1678	CDS	1	1983492	1983608	3	+	117	hypothetical protein	- none -
fig|6666666.563250.peg.1679	CDS	1	1983700	1985637	1	+	1938	Phage tape measure	Phage tail proteins 2
fig|6666666.563250.peg.1680	CDS	1	1985630	1986178	2	+	549	hypothetical protein	- none -
fig|6666666.563250.peg.1681	CDS	1	1986159	1987145	3	+	987	hypothetical protein	- none -
fig|6666666.563250.peg.1682	CDS	1	1987138	1987617	1	+	480	hypothetical protein	- none -
fig|6666666.563250.peg.1683	CDS	1	1987620	1987823	3	+	204	hypothetical protein	- none -
fig|6666666.563250.peg.1684	CDS	1	1987842	1988387	3	+	546	hypothetical protein	- none -
fig|6666666.563250.peg.1685	CDS	1	1988380	1988766	1	+	387	hypothetical protein	- none -
fig|6666666.563250.peg.1686	CDS	1	1988798	1989946	2	+	1149	hypothetical protein	- none -
fig|6666666.563250.peg.1687	CDS	1	1989949	1990818	1	+	870	hypothetical protein	- none -
fig|6666666.563250.peg.1688	CDS	1	1990811	1991287	2	+	477	hypothetical protein	- none -
fig|6666666.563250.peg.1689	CDS	1	1991287	1992336	1	+	1050	Phage tail fiber protein	Phage tail fiber proteins
fig|6666666.563250.peg.1690	CDS	1	1992604	1992392	-1	-	213	hypothetical protein	- none -
fig|6666666.563250.peg.1691	CDS	1	1992725	1992943	2	+	219	hypothetical protein	- none -
fig|6666666.563250.peg.1692	CDS	1	1992940	1993176	1	+	237	hypothetical protein	- none -
fig|6666666.563250.peg.1693	CDS	1	1994221	1993259	-1	-	963	Hydrolase, alpha/beta fold family functionally coupled to Phosphoribulokinase	cAMP signaling in bacteria
fig|6666666.563250.peg.1694	CDS	1	1994382	1994864	3	+	483	hypothetical protein	- none -
fig|6666666.563250.peg.1695	CDS	1	1995762	1994854	-3	-	909	Permease of the drug/metabolite transporter (DMT) superfamily	- none -
fig|6666666.563250.peg.1696	CDS	1	1996117	1995770	-1	-	348	hypothetical protein	- none -
fig|6666666.563250.peg.1697	CDS	1	1996261	1996716	1	+	456	hypothetical protein	- none -
fig|6666666.563250.peg.1698	CDS	1	1997496	1996711	-3	-	786	hypothetical protein	- none -
fig|6666666.563250.peg.1699	CDS	1	1997900	1999042	2	+	1143	Cystathionine gamma-lyase (EC 4.4.1.1)	Cysteine Biosynthesis; <br>Glycine and Serine Utilization; <br>Methionine Biosynthesis; <br>Methionine Degradation
fig|6666666.563250.peg.1700	CDS	1	1999261	2000604	1	+	1344	NADP-specific glutamate dehydrogenase (EC 1.4.1.4)	Arginine and Ornithine Degradation; <br>Glutamate dehydrogenases; <br>Glutamine, Glutamate, Aspartate and Asparagine Biosynthesis; <br>Proline Synthesis
fig|6666666.563250.peg.1701	CDS	1	2000796	2001515	3	+	720	DNA recombination and repair protein RecO	CBSS-176299.4.peg.1292; <br>DNA repair, bacterial RecFOR pathway; <br>Glycyl-tRNA synthetase containing cluster
fig|6666666.563250.peg.1702	CDS	1	2001521	2003929	2	+	2409	TonB-dependent receptor; Outer membrane receptor for ferrienterochelin and colicins	Ton and Tol transport systems
fig|6666666.563250.peg.1703	CDS	1	2003930	2004604	2	+	675	hypothetical protein	- none -
fig|6666666.563250.peg.1704	CDS	1	2005122	2004601	-3	-	522	hypothetical protein	- none -
fig|6666666.563250.peg.1705	CDS	1	2005628	2006053	2	+	426	Glyoxalase/Bleomycin resistance protein/Dioxygenase family protein	- none -
fig|6666666.563250.peg.1706	CDS	1	2008102	2006108	-1	-	1995	Prolyl oligopeptidase family protein	- none -
fig|6666666.563250.peg.1707	CDS	1	2008462	2009397	1	+	936	hypothetical protein	- none -
fig|6666666.563250.peg.1708	CDS	1	2009709	2009849	3	+	141	FIG01018883: hypothetical protein	- none -
fig|6666666.563250.peg.1709	CDS	1	2009859	2011955	3	+	2097	Ferrous iron transporter FeoB	- none -
fig|6666666.563250.peg.1710	CDS	1	2013046	2012120	-1	-	927	Permease of the drug/metabolite transporter (DMT) superfamily	- none -
fig|6666666.563250.peg.1711	CDS	1	2013491	2013087	-2	-	405	hypothetical protein	- none -
fig|6666666.563250.peg.1712	CDS	1	2014290	2013556	-3	-	735	DnaJ-like protein DjlA	- none -
fig|6666666.563250.peg.1713	CDS	1	2015241	2014507	-3	-	735	hypothetical protein	- none -
fig|6666666.563250.peg.1714	CDS	1	2015656	2016066	1	+	411	hypothetical protein	- none -
fig|6666666.563250.peg.1715	CDS	1	2016227	2016982	2	+	756	Acyl-CoA:1-acyl-sn-glycerol-3-phosphate acyltransferase (EC 2.3.1.51)	- none -
fig|6666666.563250.peg.1716	CDS	1	2017004	2017999	2	+	996	Probable acyl-ACP desaturase, Stearoyl-ACP desaturase (EC 1.14.19.2)	- none -
fig|6666666.563250.peg.1717	CDS	1	2018012	2018668	2	+	657	HD domain protein	- none -
fig|6666666.563250.peg.1718	CDS	1	2019195	2018815	-3	-	381	hypothetical protein	- none -
fig|6666666.563250.peg.1719	CDS	1	2019198	2019323	3	+	126	hypothetical protein	- none -
fig|6666666.563250.peg.1720	CDS	1	2021133	2019388	-3	-	1746	hypothetical protein	- none -
fig|6666666.563250.peg.1721	CDS	1	2022280	2021183	-1	-	1098	Radical SAM domain protein	- none -
fig|6666666.563250.peg.1722	CDS	1	2022456	2023532	3	+	1077	Isoaspartyl aminopeptidase (EC 3.4.19.5) @ Asp-X dipeptidase	Omega peptidases (EC 3.4.19.-); <br>Protein degradation
fig|6666666.563250.peg.1723	CDS	1	2023728	2029250	3	+	5523	hypothetical protein	- none -
fig|6666666.563250.peg.1724	CDS	1	2029388	2029537	2	+	150	hypothetical protein	- none -
fig|6666666.563250.peg.1725	CDS	1	2029583	2031937	2	+	2355	Multimodular transpeptidase-transglycosylase (EC 2.4.1.129) (EC 3.4.-.-)	- none -
fig|6666666.563250.peg.1726	CDS	1	2032164	2034173	3	+	2010	Lysyl endopeptidase (EC 3.4.21.50)	Serine endopeptidase (EC 3.4.21.-)
fig|6666666.563250.peg.1727	CDS	1	2035132	2034224	-1	-	909	hypothetical protein	- none -
fig|6666666.563250.peg.1728	CDS	1	2035692	2035219	-3	-	474	hypothetical protein	- none -
fig|6666666.563250.peg.1729	CDS	1	2035785	2036885	3	+	1101	DNA polymerase IV (EC 2.7.7.7)	DNA repair, bacterial
fig|6666666.563250.peg.1730	CDS	1	2038045	2036900	-1	-	1146	Aspartate aminotransferase (EC 2.6.1.1)	Glutamine, Glutamate, Aspartate and Asparagine Biosynthesis; <br>Threonine and Homoserine Biosynthesis
fig|6666666.563250.peg.1731	CDS	1	2038250	2038933	2	+	684	Succinate dehydrogenase cytochrome b subunit	- none -
fig|6666666.563250.peg.1732	CDS	1	2038946	2040964	2	+	2019	Succinate dehydrogenase flavoprotein subunit (EC 1.3.5.1)	- none -
fig|6666666.563250.peg.1733	CDS	1	2040974	2041720	2	+	747	Succinate dehydrogenase iron-sulfur protein (EC 1.3.5.1)	- none -
fig|6666666.563250.peg.1734	CDS	1	2041868	2042836	2	+	969	peptidase M20/M25/M40 family protein	- none -
fig|6666666.563250.peg.1735	CDS	1	2042840	2043340	2	+	501	hypothetical protein	- none -
fig|6666666.563250.peg.1736	CDS	1	2045763	2043349	-3	-	2415	Peptidase, M20/M25/M40 family	- none -
fig|6666666.563250.peg.1737	CDS	1	2045881	2046348	1	+	468	CBS domain protein	- none -
fig|6666666.563250.peg.1738	CDS	1	2046756	2046406	-3	-	351	hypothetical protein	- none -
fig|6666666.563250.peg.1739	CDS	1	2048456	2047554	-2	-	903	Deacetylases, including yeast histone deacetylase and acetoin utilization protein	- none -
fig|6666666.563250.peg.1740	CDS	1	2050553	2048490	-2	-	2064	Methionyl-tRNA synthetase (EC 6.1.1.10)	tRNA aminoacylation, Met
fig|6666666.563250.peg.1741	CDS	1	2051109	2051609	3	+	501	hypothetical protein	- none -
fig|6666666.563250.peg.1742	CDS	1	2052592	2051666	-1	-	927	Thioredoxin reductase (EC 1.8.1.9)	Thioredoxin-disulfide reductase; <br>pyrimidine conversions
fig|6666666.563250.peg.1743	CDS	1	2054397	2052781	-3	-	1617	Protein of unknown function (DUF1501)	- none -
fig|6666666.563250.peg.1744	CDS	1	2054429	2054566	2	+	138	hypothetical protein	- none -
fig|6666666.563250.peg.1745	CDS	1	2056083	2054590	-3	-	1494	hypothetical protein	- none -
fig|6666666.563250.peg.1746	CDS	1	2056195	2057088	1	+	894	Muramoyltetrapeptide carboxypeptidase (EC 3.4.17.13)	Metallocarboxypeptidases (EC 3.4.17.-); <br>Murein Hydrolases; <br>Recycling of Peptidoglycan Amino Acids
fig|6666666.563250.peg.1747	CDS	1	2057093	2057452	2	+	360	UPF0102 protein YraN	- none -
fig|6666666.563250.peg.1748	CDS	1	2060166	2057548	-3	-	2619	Chitinase (EC 3.2.1.14)	- none -
fig|6666666.563250.peg.1749	CDS	1	2065019	2060250	-2	-	4770	Chitinase (EC 3.2.1.14)	- none -
fig|6666666.563250.peg.1750	CDS	1	2065954	2065547	-1	-	408	hypothetical protein	- none -
fig|6666666.563250.peg.1751	CDS	1	2069405	2066022	-2	-	3384	Transcription-repair coupling factor	Cell division-ribosomal stress proteins cluster; <br>Transcription factors bacterial
fig|6666666.563250.peg.1752	CDS	1	2069593	2070024	1	+	432	hypothetical protein	- none -
fig|6666666.563250.peg.1753	CDS	1	2071603	2070065	-1	-	1539	hypothetical protein	- none -
fig|6666666.563250.peg.1754	CDS	1	2072099	2071608	-2	-	492	hypothetical protein	- none -
fig|6666666.563250.peg.1755	CDS	1	2072910	2072086	-3	-	825	hypothetical protein	- none -
fig|6666666.563250.peg.1756	CDS	1	2073282	2072929	-3	-	354	FIG00650647: hypothetical protein	- none -
fig|6666666.563250.peg.1757	CDS	1	2074369	2073371	-1	-	999	Fructose-1,6-bisphosphatase, type I (EC 3.1.3.11)	- none -
fig|6666666.563250.peg.1758	CDS	1	2074527	2075009	3	+	483	Histone acetyltransferase HPA2 and related acetyltransferases	- none -
fig|6666666.563250.peg.1759	CDS	1	2075017	2075760	1	+	744	hypothetical protein	- none -
fig|6666666.563250.peg.1760	CDS	1	2075775	2077031	3	+	1257	Aspartokinase (EC 2.7.2.4)	Lysine Biosynthesis DAP Pathway; <br>Lysine Biosynthesis DAP Pathway, GJO scratch; <br>Threonine and Homoserine Biosynthesis
fig|6666666.563250.peg.1761	CDS	1	2077086	2078897	3	+	1812	Putative hemolysin	- none -
fig|6666666.563250.peg.1762	CDS	1	2079342	2078926	-3	-	417	Arsenate reductase (EC 1.20.4.4) thioredoxin-coupled, LMWP family	- none -
fig|6666666.563250.peg.1763	CDS	1	2079842	2079363	-2	-	480	Acetyltransferase, GNAT family	- none -
fig|6666666.563250.peg.1764	CDS	1	2080342	2079854	-1	-	489	hypothetical protein	- none -
fig|6666666.563250.peg.1765	CDS	1	2080687	2080364	-1	-	324	Transcriptional regulator, ArsR family	- none -
fig|6666666.563250.peg.1766	CDS	1	2081127	2080771	-3	-	357	Tsr1131 protein	- none -
fig|6666666.563250.peg.1767	CDS	1	2081711	2081253	-2	-	459	DUF1801 domain-containing protein	- none -
fig|6666666.563250.peg.1768	CDS	1	2082394	2081771	-1	-	624	COG4339 metal-dependent phosphohydrolase, HD superfamily	- none -
fig|6666666.563250.peg.1769	CDS	1	2083329	2082388	-3	-	942	D-3-phosphoglycerate dehydrogenase (EC 1.1.1.95)	Glycine and Serine Utilization; <br>Pyridoxin (Vitamin B6) Biosynthesis; <br>Serine Biosynthesis
fig|6666666.563250.peg.1770	CDS	1	2083703	2083338	-2	-	366	FIG00652032: hypothetical protein	- none -
fig|6666666.563250.peg.1771	CDS	1	2085164	2083809	-2	-	1356	Mg/Co/Ni transporter MgtE, CBS domain-containing	- none -
fig|6666666.563250.peg.1772	CDS	1	2086142	2085285	-2	-	858	SSU rRNA (adenine(1518)-N(6)/adenine(1519)-N(6))-dimethyltransferase (EC 2.1.1.182)	ECSIG4-SIG7; <br>RNA methylation
fig|6666666.563250.peg.1773	CDS	1	2086449	2086135	-3	-	315	hypothetical protein	- none -
fig|6666666.563250.peg.1774	CDS	1	2088345	2086561	-3	-	1785	Secreted protein containing tetratricopeptide re peats	- none -
fig|6666666.563250.peg.1775	CDS	1	2089682	2088411	-2	-	1272	Seryl-tRNA synthetase (EC 6.1.1.11)	Glycine and Serine Utilization; <br>tRNA aminoacylation, Ser
fig|6666666.563250.peg.1776	CDS	1	2090036	2089878	-2	-	159	hypothetical protein	- none -
fig|6666666.563250.peg.1777	CDS	1	2090045	2090932	2	+	888	Transcriptional activator MetR	LysR-family proteins in Escherichia coli; <br>LysR-family proteins in Salmonella enterica Typhimurium; <br>Methionine Biosynthesis
fig|6666666.563250.peg.1778	CDS	1	2091722	2090940	-2	-	783	hydrolase-related protein	- none -
fig|6666666.563250.peg.1779	CDS	1	2092205	2093095	2	+	891	hypothetical protein	- none -
fig|6666666.563250.peg.1780	CDS	1	2094490	2093147	-1	-	1344	Vitamin K-dependent gamma-carboxylase	- none -
fig|6666666.563250.peg.1781	CDS	1	2095419	2094487	-3	-	933	FMN adenylyltransferase (EC 2.7.7.2) / Riboflavin kinase (EC 2.7.1.26)	Riboflavin, FMN and FAD metabolism; <br>Riboflavin, FMN and FAD metabolism; <br>riboflavin to FAD; <br>riboflavin to FAD
fig|6666666.563250.peg.1782	CDS	1	2096215	2095586	-1	-	630	Peptidyl-tRNA hydrolase (EC 3.1.1.29)	Cell division-ribosomal stress proteins cluster; <br>Sporulation-associated proteins with broader functions; <br>Translation termination factors bacterial
fig|6666666.563250.peg.1783	CDS	1	2096939	2096346	-2	-	594	LSU ribosomal protein L25p	- none -
fig|6666666.563250.peg.1784	CDS	1	2097906	2096965	-3	-	942	Ribose-phosphate pyrophosphokinase (EC 2.7.6.1)	De Novo Purine Biosynthesis; <br>Pentose phosphate pathway
fig|6666666.563250.peg.1785	CDS	1	2098507	2102100	1	+	3594	iron aquisition yersiniabactin synthesis enzyme (Irp2)	- none -
fig|6666666.563250.peg.1786	CDS	1	2102097	2103197	3	+	1101	hypothetical protein	- none -
fig|6666666.563250.peg.1787	CDS	1	2103305	2104414	2	+	1110	FIG00531658: hypothetical protein	- none -
fig|6666666.563250.peg.1788	CDS	1	2104488	2105201	3	+	714	hypothetical protein	- none -
fig|6666666.563250.peg.1789	CDS	1	2105246	2109610	2	+	4365	iron aquisition yersiniabactin synthesis enzyme (Irp2)	- none -
fig|6666666.563250.peg.1790	CDS	1	2109624	2111003	3	+	1380	Multi antimicrobial extrusion protein (Na(+)/drug antiporter), MATE family of MDR efflux pumps	Multidrug Resistance Efflux Pumps
fig|6666666.563250.peg.1791	CDS	1	2111936	2111178	-2	-	759	Thioesterase	- none -
fig|6666666.563250.peg.1792	CDS	1	2120584	2111963	-1	-	8622	Polyketide synthase modules and related proteins	- none -
fig|6666666.563250.peg.1793	CDS	1	2122689	2120587	-3	-	2103	Polyketide synthase modules and related proteins	- none -
fig|6666666.563250.peg.1794	CDS	1	2126152	2122862	-1	-	3291	hypothetical protein	- none -
fig|6666666.563250.peg.1795	CDS	1	2126970	2126149	-3	-	822	ATPase component of general energizing module of ECF transporters	- none -
fig|6666666.563250.peg.1796	CDS	1	2127532	2128611	1	+	1080	Transcriptional regulator, AraC family	- none -
fig|6666666.563250.peg.1797	CDS	1	2128760	2131120	2	+	2361	hypothetical protein	- none -
fig|6666666.563250.peg.1798	CDS	1	2131150	2132448	1	+	1299	hypothetical protein	- none -
fig|6666666.563250.peg.1799	CDS	1	2132763	2132545	-3	-	219	hypothetical protein	- none -
fig|6666666.563250.peg.1800	CDS	1	2133279	2132851	-3	-	429	hypothetical protein	- none -
fig|6666666.563250.peg.1801	CDS	1	2133822	2133283	-3	-	540	RNA polymerase ECF-type sigma factor	- none -
fig|6666666.563250.peg.1802	CDS	1	2134959	2134144	-3	-	816	Potassium efflux system KefA protein / Small-conductance mechanosensitive channel	Potassium homeostasis
fig|6666666.563250.peg.1803	CDS	1	2135184	2135768	3	+	585	hypothetical protein	- none -
fig|6666666.563250.peg.1804	CDS	1	2135852	2136283	2	+	432	dCMP deaminase (EC 3.5.4.12)	- none -
fig|6666666.563250.peg.1805	CDS	1	2136284	2137867	2	+	1584	Carboxy-terminal processing protease	- none -
fig|6666666.563250.peg.1806	CDS	1	2137884	2138189	3	+	306	hypothetical protein	- none -
fig|6666666.563250.peg.1807	CDS	1	2138396	2138202	-2	-	195	hypothetical protein	- none -
fig|6666666.563250.peg.1808	CDS	1	2139078	2138467	-3	-	612	MarC family integral membrane protein	- none -
fig|6666666.563250.peg.1809	CDS	1	2139195	2139761	3	+	567	hypothetical protein	- none -
fig|6666666.563250.peg.1810	CDS	1	2140156	2139950	-1	-	207	hypothetical protein	- none -
fig|6666666.563250.peg.1811	CDS	1	2140398	2141375	3	+	978	Ribonucleotide reductase of class Ia (aerobic), beta subunit (EC 1.17.4.1)	Ribonucleotide reduction
fig|6666666.563250.peg.1812	CDS	1	2141684	2144143	2	+	2460	Ribonucleotide reductase of class Ia (aerobic), alpha subunit (EC 1.17.4.1)	Ribonucleotide reduction
fig|6666666.563250.peg.1813	CDS	1	2144273	2145616	2	+	1344	dNTP triphosphohydrolase, broad substrate specificity, subgroup 3	Purine conversions; <br>dNTP triphosphohydrolase protein family
fig|6666666.563250.peg.1814	CDS	1	2147449	2145665	-1	-	1785	1-deoxy-D-xylulose 5-phosphate synthase (EC 2.2.1.7)	Pyridoxin (Vitamin B6) Biosynthesis; <br>Thiamin biosynthesis
fig|6666666.563250.peg.1815	CDS	1	2147871	2148320	3	+	450	tRNA-specific adenosine-34 deaminase (EC 3.5.4.33)	- none -
fig|6666666.563250.peg.1816	CDS	1	2148415	2150334	1	+	1920	Predicted signal-transduction protein containing cAMP-binding and CBS domains	CBSS-211586.9.peg.2560; <br>CBSS-342610.3.peg.1536; <br>cAMP signaling in bacteria
fig|6666666.563250.peg.1817	CDS	1	2150370	2151041	3	+	672	DNA polymerase III epsilon subunit (EC 2.7.7.7)	CBSS-342610.3.peg.1536
fig|6666666.563250.peg.1818	CDS	1	2151165	2151932	3	+	768	hypothetical protein	- none -
fig|6666666.563250.peg.1819	CDS	1	2152180	2151983	-1	-	198	Cold shock protein of CSP family	- none -
fig|6666666.563250.peg.1820	CDS	1	2152687	2152439	-1	-	249	hypothetical protein	- none -
fig|6666666.563250.peg.1821	CDS	1	2154504	2152720	-3	-	1785	putative chloride channel protein	- none -
fig|6666666.563250.peg.1822	CDS	1	2154505	2154621	1	+	117	hypothetical protein	- none -
fig|6666666.563250.peg.1823	CDS	1	2156384	2154636	-2	-	1749	Aspartyl-tRNA synthetase (EC 6.1.1.12)	tRNA aminoacylation, Asp and Asn
fig|6666666.563250.peg.1824	CDS	1	2156730	2159711	3	+	2982	Outer membrane TonB-dependent transporter, utilization system for glycans and polysaccharides (PUL), SusC family	- none -
fig|6666666.563250.peg.1825	CDS	1	2159723	2161048	2	+	1326	Cell surface glycan-binding lipoprotein, utilization system for glycans and polysaccharides (PUL), SusD family	- none -
fig|6666666.563250.peg.1826	CDS	1	2161557	2161138	-3	-	420	Predicted signal-transduction protein containing cAMP-binding and CBS domains	CBSS-211586.9.peg.2560; <br>CBSS-342610.3.peg.1536; <br>cAMP signaling in bacteria
fig|6666666.563250.peg.1827	CDS	1	2161631	2161807	2	+	177	hypothetical protein	- none -
fig|6666666.563250.peg.1828	CDS	1	2161935	2162084	3	+	150	hypothetical protein	- none -
fig|6666666.563250.peg.1829	CDS	1	2162706	2162143	-3	-	564	hypothetical protein	- none -
fig|6666666.563250.peg.1830	CDS	1	2166288	2162710	-3	-	3579	hypothetical protein	- none -
fig|6666666.563250.peg.1831	CDS	1	2169741	2166307	-3	-	3435	hypothetical protein	- none -
fig|6666666.563250.peg.1832	CDS	1	2170699	2172465	1	+	1767	VgrG protein	- none -
fig|6666666.563250.peg.1833	CDS	1	2172482	2173435	2	+	954	hypothetical protein	- none -
fig|6666666.563250.peg.1834	CDS	1	2173447	2173938	1	+	492	hypothetical protein	- none -
fig|6666666.563250.peg.1835	CDS	1	2173949	2176654	2	+	2706	hypothetical protein	- none -
fig|6666666.563250.peg.1836	CDS	1	2176658	2177359	2	+	702	hypothetical protein	- none -
fig|6666666.563250.peg.1837	CDS	1	2177367	2178146	3	+	780	hypothetical protein	- none -
fig|6666666.563250.peg.1838	CDS	1	2178695	2178826	2	+	132	hypothetical protein	- none -
fig|6666666.563250.peg.1839	CDS	1	2178836	2179909	2	+	1074	hypothetical protein	- none -
fig|6666666.563250.peg.1840	CDS	1	2179912	2180472	1	+	561	LemA protein	- none -
fig|6666666.563250.peg.1841	CDS	1	2180456	2180812	2	+	357	hypothetical protein	- none -
fig|6666666.563250.peg.1842	CDS	1	2180824	2180958	1	+	135	hypothetical protein	- none -
fig|6666666.563250.peg.1843	CDS	1	2182209	2181010	-3	-	1200	hypothetical protein	- none -
fig|6666666.563250.peg.1844	CDS	1	2182233	2182349	3	+	117	hypothetical protein	- none -
fig|6666666.563250.peg.1845	CDS	1	2183053	2182421	-1	-	633	hypothetical protein	- none -
fig|6666666.563250.peg.1846	CDS	1	2184426	2183173	-3	-	1254	hypothetical protein	- none -
fig|6666666.563250.peg.1847	CDS	1	2185140	2184748	-3	-	393	hypothetical protein	- none -
fig|6666666.563250.peg.1848	CDS	1	2186600	2185311	-2	-	1290	putative hemolysin secretion protein	- none -
fig|6666666.563250.peg.1849	CDS	1	2186911	2186747	-1	-	165	hypothetical protein	- none -
fig|6666666.563250.peg.1850	CDS	1	2187362	2187111	-2	-	252	hypothetical protein	- none -
fig|6666666.563250.peg.1851	CDS	1	2187645	2187397	-3	-	249	hypothetical protein	- none -
fig|6666666.563250.peg.1852	CDS	1	2189896	2187710	-1	-	2187	Bacteriocin/lantibiotic efflux ABC transporter, permease/ATP-binding protein	- none -
fig|6666666.563250.peg.1853	CDS	1	2190239	2190087	-2	-	153	hypothetical protein	- none -
fig|6666666.563250.peg.1854	CDS	1	2190490	2190281	-1	-	210	hypothetical protein	- none -
fig|6666666.563250.peg.1855	CDS	1	2192182	2190611	-1	-	1572	hypothetical protein	- none -
fig|6666666.563250.peg.1856	CDS	1	2192436	2192308	-3	-	129	hypothetical protein	- none -
fig|6666666.563250.peg.1857	CDS	1	2192859	2193068	3	+	210	hypothetical protein	- none -
fig|6666666.563250.peg.1858	CDS	1	2193575	2193063	-2	-	513	hypothetical protein	- none -
fig|6666666.563250.peg.1859	CDS	1	2193785	2193654	-2	-	132	hypothetical protein	- none -
fig|6666666.563250.peg.1860	CDS	1	2194046	2195440	2	+	1395	hypothetical protein	- none -
fig|6666666.563250.peg.1861	CDS	1	2199009	2195518	-3	-	3492	Efflux system associated with Geranylgeranyl-PP synthase, inner membrane transporter (RND type)	- none -
fig|6666666.563250.peg.1862	CDS	1	2200182	2199016	-3	-	1167	Efflux system associated with Geranylgeranyl-PP synthase, membrane fusion component	- none -
fig|6666666.563250.peg.1863	CDS	1	2201551	2200193	-1	-	1359	Efflux system associated with Geranylgeranyl-PP synthase, outer membrane factor (OMF) lipoprotein	- none -
fig|6666666.563250.peg.1864	CDS	1	2202153	2201548	-3	-	606	Transcriptional regulator, AcrR family	- none -
fig|6666666.563250.peg.1865	CDS	1	2202478	2203452	1	+	975	Geranylgeranyl diphosphate synthase (EC 2.5.1.29)	Isoprenoinds for Quinones
fig|6666666.563250.peg.1866	CDS	1	2203445	2203807	2	+	363	hypothetical protein	- none -
fig|6666666.563250.peg.1867	CDS	1	2204139	2203810	-3	-	330	hypothetical protein	- none -
fig|6666666.563250.peg.1868	CDS	1	2204791	2204276	-1	-	516	hypothetical protein	- none -
fig|6666666.563250.peg.1869	CDS	1	2204912	2207695	2	+	2784	2-oxoglutarate dehydrogenase E1 component (EC 1.2.4.2)	Dehydrogenase complexes
fig|6666666.563250.peg.1870	CDS	1	2207777	2208988	2	+	1212	Dihydrolipoamide succinyltransferase component (E2) of 2-oxoglutarate dehydrogenase complex (EC 2.3.1.61)	Dehydrogenase complexes
fig|6666666.563250.peg.1871	CDS	1	2209983	2209060	-3	-	924	Mevalonate kinase (EC 2.7.1.36)	Mevalonate Branch of Isoprenoid Biosynthesis
fig|6666666.563250.peg.1872	CDS	1	2211320	2209995	-2	-	1326	Hydroxymethylglutaryl-CoA reductase (EC 1.1.1.34)	Mevalonate Branch of Isoprenoid Biosynthesis
fig|6666666.563250.peg.1873	CDS	1	2211559	2211416	-1	-	144	hypothetical protein	- none -
fig|6666666.563250.peg.1874	CDS	1	2211563	2213734	2	+	2172	Dipeptidyl peptidase IV	- none -
fig|6666666.563250.peg.1875	CDS	1	2213747	2215573	2	+	1827	Di-tripeptide/cation symporter	- none -
fig|6666666.563250.peg.1876	CDS	1	2215588	2217804	1	+	2217	Di-tripeptide/cation symporter	- none -
fig|6666666.563250.peg.1877	CDS	1	2217888	2218427	3	+	540	hypothetical protein	- none -
fig|6666666.563250.peg.1878	CDS	1	2218686	2218528	-3	-	159	hypothetical protein	- none -
fig|6666666.563250.peg.1879	CDS	1	2220979	2218931	-1	-	2049	DNA internalization-related competence protein ComEC/Rec2	- none -
fig|6666666.563250.peg.1880	CDS	1	2221476	2220976	-3	-	501	Probable lipoprotein NlpC	- none -
fig|6666666.563250.peg.1881	CDS	1	2221741	2223948	1	+	2208	hypothetical protein	- none -
fig|6666666.563250.peg.1882	CDS	1	2224178	2226394	2	+	2217	hypothetical protein	- none -
fig|6666666.563250.peg.1883	CDS	1	2227499	2226384	-2	-	1116	Lipid-A-disaccharide synthase (EC 2.4.1.182)	- none -
fig|6666666.563250.peg.1884	CDS	1	2227964	2227668	-2	-	297	hypothetical protein	- none -
fig|6666666.563250.peg.1885	CDS	1	2228739	2227957	-3	-	783	5&#39;-nucleotidase SurE (EC 3.1.3.5)	- none -
fig|6666666.563250.peg.1886	CDS	1	2229067	2231202	1	+	2136	Tail-specific protease precursor (EC 3.4.21.102)	- none -
fig|6666666.563250.peg.1887	CDS	1	2231211	2232326	3	+	1116	Dipeptide ABC transporter, permease protein DppC (TC 3.A.1.5.2)	- none -
fig|6666666.563250.peg.1888	CDS	1	2234155	2232566	-1	-	1590	hypothetical protein	- none -
fig|6666666.563250.peg.1889	CDS	1	2234550	2235341	3	+	792	DNA/RNA non-specific endonuclease	- none -
fig|6666666.563250.peg.1890	CDS	1	2236599	2235346	-3	-	1254	Rod shape-determining protein RodA	Bacterial cell division cluster
fig|6666666.563250.peg.1891	CDS	1	2238470	2236599	-2	-	1872	Peptidoglycan D,D-transpeptidase MrdA (EC 3.4.16.4)	- none -
fig|6666666.563250.peg.1892	CDS	1	2238973	2238467	-1	-	507	Rod shape-determining protein MreD	Bacterial cell division cluster; <br>CBSS-354.1.peg.2917
fig|6666666.563250.peg.1893	CDS	1	2239790	2238966	-2	-	825	Rod shape-determining protein MreC	Bacterial cell division cluster; <br>CBSS-354.1.peg.2917
fig|6666666.563250.peg.1894	CDS	1	2240958	2239930	-3	-	1029	Rod shape-determining protein MreB	Bacterial cell division cluster
fig|6666666.563250.peg.1895	CDS	1	2242535	2241003	-2	-	1533	IMP cyclohydrolase (EC 3.5.4.10) / Phosphoribosylaminoimidazolecarboxamide formyltransferase (EC 2.1.2.3)	5-FCL-like protein; <br>De Novo Purine Biosynthesis; <br>De Novo Purine Biosynthesis
fig|6666666.563250.peg.1896	CDS	1	2242685	2243938	2	+	1254	ABC-type antimicrobial peptide transport system, permease component	- none -
fig|6666666.563250.peg.1897	CDS	1	2249022	2244220	-3	-	4803	hypothetical protein	- none -
fig|6666666.563250.peg.1898	CDS	1	2249341	2249195	-1	-	147	hypothetical protein	- none -
fig|6666666.563250.peg.1899	CDS	1	2249943	2249494	-3	-	450	hypothetical protein	- none -
fig|6666666.563250.peg.1900	CDS	1	2250172	2250450	1	+	279	hypothetical protein	- none -
fig|6666666.563250.peg.1901	CDS	1	2250634	2251440	1	+	807	Uncharacterized metal-dependent hydrolase YcfH	- none -
fig|6666666.563250.peg.1902	CDS	1	2251455	2252489	3	+	1035	L-asparaginase I, cytoplasmic (EC 3.5.1.1)	Glutamine, Glutamate, Aspartate and Asparagine Biosynthesis
fig|6666666.563250.peg.1903	CDS	1	2252726	2253526	2	+	801	MotA/TolQ/ExbB proton channel family protein	Ton and Tol transport systems
fig|6666666.563250.peg.1904	CDS	1	2253638	2254108	2	+	471	hypothetical protein	- none -
fig|6666666.563250.peg.1905	CDS	1	2254110	2254718	3	+	609	Biopolymer transport exbD protein.	- none -
fig|6666666.563250.peg.1906	CDS	1	2254742	2255227	2	+	486	hypothetical protein	- none -
fig|6666666.563250.peg.1907	CDS	1	2255717	2256325	2	+	609	Biopolymer transport exbD protein.	- none -
fig|6666666.563250.peg.1908	CDS	1	2256330	2256812	3	+	483	hypothetical protein	- none -
fig|6666666.563250.peg.1909	CDS	1	2257409	2258113	2	+	705	hypothetical protein	- none -
fig|6666666.563250.peg.1910	CDS	1	2258713	2258108	-1	-	606	FIG00649594: hypothetical protein	- none -
fig|6666666.563250.peg.1911	CDS	1	2260173	2258713	-3	-	1461	RNA polymerase sigma-54 factor RpoN	Transcription initiation, bacterial sigma factors
fig|6666666.563250.peg.1912	CDS	1	2260391	2260519	2	+	129	hypothetical protein	- none -
fig|6666666.563250.peg.1913	CDS	1	2261181	2260543	-3	-	639	Two-component transcriptional response regulator, NarL/FixJ family	- none -
fig|6666666.563250.peg.1914	CDS	1	2262261	2261479	-3	-	783	Two-component system sensor histidine kinase	- none -
fig|6666666.563250.peg.1915	CDS	1	2262896	2262234	-2	-	663	hypothetical protein	- none -
fig|6666666.563250.peg.1916	CDS	1	2263703	2262900	-2	-	804	hypothetical protein	- none -
fig|6666666.563250.peg.1917	CDS	1	2263969	2264121	1	+	153	hypothetical protein	- none -
fig|6666666.563250.peg.1918	CDS	1	2264349	2264230	-3	-	120	hypothetical protein	- none -
fig|6666666.563250.peg.1919	CDS	1	2265466	2264543	-1	-	924	hypothetical protein	- none -
fig|6666666.563250.peg.1920	CDS	1	2265652	2265765	1	+	114	hypothetical protein	- none -
fig|6666666.563250.peg.1921	CDS	1	2266679	2268439	2	+	1761	hypothetical protein	- none -
fig|6666666.563250.peg.1922	CDS	1	2268452	2269006	2	+	555	hypothetical protein	- none -
fig|6666666.563250.peg.1923	CDS	1	2269167	2269400	3	+	234	hypothetical protein	- none -
fig|6666666.563250.peg.1924	CDS	1	2270945	2269485	-2	-	1461	probable oxidoreductase-putative NAD-dependent nucleoside-diphosphate-sugar epimerase	- none -
fig|6666666.563250.peg.1925	CDS	1	2271274	2271447	1	+	174	hypothetical protein	- none -
fig|6666666.563250.peg.1926	CDS	1	2273272	2271671	-1	-	1602	hypothetical protein	- none -
fig|6666666.563250.peg.1927	CDS	1	2274650	2273367	-2	-	1284	Cell surface glycan-binding lipoprotein, utilization system for glycans and polysaccharides (PUL), SusD family	- none -
fig|6666666.563250.peg.1928	CDS	1	2278130	2274663	-2	-	3468	Outer membrane TonB-dependent transporter, utilization system for glycans and polysaccharides (PUL), SusC family	- none -
fig|6666666.563250.peg.1929	CDS	1	2279418	2278282	-3	-	1137	hypothetical protein	- none -
fig|6666666.563250.peg.1930	CDS	1	2280106	2279525	-1	-	582	RNA polymerase ECF-type sigma factor	- none -
fig|6666666.563250.peg.1931	CDS	1	2281077	2280595	-3	-	483	Cytidine deaminase (EC 3.5.4.5)	pyrimidine conversions
fig|6666666.563250.peg.1932	CDS	1	2281404	2281171	-3	-	234	hypothetical protein	- none -
fig|6666666.563250.peg.1933	CDS	1	2281561	2282436	1	+	876	hypothetical protein	- none -
fig|6666666.563250.peg.1934	CDS	1	2282491	2282715	1	+	225	hypothetical protein	- none -
fig|6666666.563250.peg.1935	CDS	1	2283453	2282821	-3	-	633	Threonine efflux protein	- none -
fig|6666666.563250.peg.1936	CDS	1	2283527	2284072	2	+	546	Transcriptional regulator, AsnC family	- none -
fig|6666666.563250.peg.1937	CDS	1	2289044	2284140	-2	-	4905	hypothetical protein	- none -
fig|6666666.563250.peg.1938	CDS	1	2291585	2289450	-2	-	2136	Inner membrane protein YqiK	- none -
fig|6666666.563250.peg.1939	CDS	1	2292324	2291602	-3	-	723	FIG00693341: hypothetical protein	- none -
fig|6666666.563250.peg.1940	CDS	1	2293050	2292337	-3	-	714	Suppressor of sigma54-dependent transcription, PspA-like	- none -
fig|6666666.563250.peg.1941	CDS	1	2293449	2293054	-3	-	396	hypothetical protein	- none -
fig|6666666.563250.peg.1942	CDS	1	2293764	2294522	3	+	759	hypothetical protein	- none -
fig|6666666.563250.peg.1943	CDS	1	2294767	2295345	1	+	579	hypothetical protein	- none -
fig|6666666.563250.peg.1944	CDS	1	2296797	2295355	-3	-	1443	Asparaginyl-tRNA synthetase (EC 6.1.1.22)	tRNA aminoacylation, Asp and Asn
fig|6666666.563250.peg.1945	CDS	1	2299761	2297359	-3	-	2403	Exporter protein, RND family	- none -
fig|6666666.563250.peg.1946	CDS	1	2302286	2299845	-2	-	2442	hypothetical protein	- none -
fig|6666666.563250.peg.1947	CDS	1	2302933	2302370	-1	-	564	Ribosome recycling factor	Ribosome recycling related cluster; <br>Translation termination factors bacterial
fig|6666666.563250.peg.1948	CDS	1	2303689	2302982	-1	-	708	Uridylate kinase (EC 2.7.4.22)	- none -
fig|6666666.563250.peg.1949	CDS	1	2303718	2303858	3	+	141	hypothetical protein	- none -
fig|6666666.563250.peg.1950	CDS	1	2304935	2304114	-2	-	822	Translation elongation factor Ts	CBSS-312309.3.peg.1965; <br>Ribosome recycling related cluster; <br>Translation elongation factors bacterial
fig|6666666.563250.peg.1951	CDS	1	2305929	2305138	-3	-	792	SSU ribosomal protein S2p (SAe)	CBSS-312309.3.peg.1965; <br>Ribosome SSU bacterial; <br>Ribosome recycling related cluster
fig|6666666.563250.peg.1952	CDS	1	2306480	2306094	-2	-	387	SSU ribosomal protein S9p (S16e)	Ribosome SSU bacterial
fig|6666666.563250.peg.1953	CDS	1	2306935	2306480	-1	-	456	LSU ribosomal protein L13p (L13Ae)	- none -
fig|6666666.563250.peg.1954	CDS	1	2307251	2308447	2	+	1197	Beta-lactamase	Beta-lactamase
fig|6666666.563250.peg.1955	CDS	1	2311337	2308527	-2	-	2811	DNA polymerase I (EC 2.7.7.7)	- none -
fig|6666666.563250.peg.1956	CDS	1	2311825	2313093	1	+	1269	Putative phosphoesterase	- none -
fig|6666666.563250.peg.1957	CDS	1	2313174	2313470	3	+	297	Redox-inactive protein similar to thioredoxin	- none -
fig|6666666.563250.peg.1958	CDS	1	2314112	2313471	-2	-	642	Polysaccharide deacetylase	- none -
fig|6666666.563250.peg.1959	CDS	1	2317516	2314205	-1	-	3312	putative membrane protein	- none -
fig|6666666.563250.peg.1960	CDS	1	2317915	2317802	-1	-	114	hypothetical protein	- none -
fig|6666666.563250.peg.1961	CDS	1	2318157	2319482	3	+	1326	hypothetical protein	- none -
fig|6666666.563250.peg.1962	CDS	1	2320495	2319653	-1	-	843	Universal stress protein Coch_1269	- none -
fig|6666666.563250.peg.1963	CDS	1	2320648	2321148	1	+	501	Bacterial ribosome SSU maturation protein RimP	- none -
fig|6666666.563250.peg.1964	CDS	1	2321161	2322393	1	+	1233	Transcription termination protein NusA	NusA-TFII Cluster; <br>Transcription factors bacterial
fig|6666666.563250.peg.1965	CDS	1	2322435	2325344	3	+	2910	Translation initiation factor 2	CBSS-138119.3.peg.2719; <br>NusA-TFII Cluster; <br>Translation initiation factors bacterial
fig|6666666.563250.peg.1966	CDS	1	2325871	2325416	-1	-	456	hypothetical protein	- none -
fig|6666666.563250.peg.1967	CDS	1	2326094	2327416	2	+	1323	Molybdopterin oxidoreductase subunit, predicted; chaperone protein HtpG	- none -
fig|6666666.563250.peg.1968	CDS	1	2327474	2330590	2	+	3117	Molybdopterin oxidoreductase, iron-sulfur binding subunit (EC 1.2.7.-)	- none -
fig|6666666.563250.peg.1969	CDS	1	2330626	2332101	1	+	1476	Molybdopterin oxidoreductase	- none -
fig|6666666.563250.peg.1970	CDS	1	2332104	2332643	3	+	540	ABC-type Fe3+ transport system protein; Molybdenum transport protein, putative	- none -
fig|6666666.563250.peg.1971	CDS	1	2332649	2333323	2	+	675	hypothetical protein	- none -
fig|6666666.563250.peg.1972	CDS	1	2333352	2334725	3	+	1374	Putative uncharacterized protein TTHA1760	- none -
fig|6666666.563250.peg.1973	CDS	1	2334758	2335831	2	+	1074	Alternative cytochrome c oxidase polypeptide CoxM (EC 1.9.3.1)	- none -
fig|6666666.563250.peg.1974	CDS	1	2335875	2337701	3	+	1827	Alternative cytochrome c oxidase polypeptide CoxN (EC 1.9.3.1)	- none -
fig|6666666.563250.peg.1975	CDS	1	2337829	2338851	1	+	1023	Holliday junction ATP-dependent DNA helicase RuvB (EC 3.6.4.12)	- none -
fig|6666666.563250.peg.1976	CDS	1	2338905	2340236	3	+	1332	Cytochrome P450 hydroxylase	- none -
fig|6666666.563250.peg.1977	CDS	1	2340261	2341187	3	+	927	Epoxyqueuosine reductase (EC 1.17.99.6) QueG	- none -
fig|6666666.563250.peg.1978	CDS	1	2341372	2343678	1	+	2307	NADP-dependent malic enzyme (EC 1.1.1.40)	Pyruvate metabolism I: anaplerotic reactions, PEP
fig|6666666.563250.peg.1979	CDS	1	2343806	2344387	2	+	582	Holliday junction ATP-dependent DNA helicase RuvA (EC 3.6.4.12)	- none -
fig|6666666.563250.peg.1980	CDS	1	2344391	2351464	2	+	7074	hypothetical protein	- none -
fig|6666666.563250.peg.1981	CDS	1	2351606	2351986	2	+	381	Glycine cleavage system H protein	Glycine and Serine Utilization; <br>Glycine cleavage system
fig|6666666.563250.peg.1982	CDS	1	2351976	2352365	3	+	390	hypothetical protein	- none -
fig|6666666.563250.peg.1983	CDS	1	2352517	2353242	1	+	726	TonB family protein	- none -
fig|6666666.563250.peg.1984	CDS	1	2353341	2354138	3	+	798	hypothetical protein	- none -
fig|6666666.563250.peg.1985	CDS	1	2355066	2354188	-3	-	879	MBL-fold metallo-hydrolase superfamily	- none -
fig|6666666.563250.peg.1986	CDS	1	2355285	2356196	3	+	912	Heme O synthase, protoheme IX farnesyltransferase, COX10-CtaB	- none -
fig|6666666.563250.peg.1987	CDS	1	2356187	2356768	2	+	582	Alternative cytochrome c oxidase polypeptide CoxO (EC 1.9.3.1)	- none -
fig|6666666.563250.peg.1988	CDS	1	2356817	2357908	2	+	1092	Alternative cytochrome c oxidase polypeptide CoxP (EC 1.9.3.1)	- none -
fig|6666666.563250.peg.1989	CDS	1	2357928	2358287	3	+	360	Putative subunit of Alternative cytochrome c oxidase	- none -
fig|6666666.563250.peg.1990	CDS	1	2358429	2359082	3	+	654	Hypothetical protein associated with DUF420, no CDD domain	- none -
fig|6666666.563250.peg.1991	CDS	1	2359089	2359820	3	+	732	Cytochrome oxidase biogenesis protein Sco1/SenC/PrrC, thiol-disulfide reductase involved in Cu(I) insertion into CoxII Cu(A) center	- none -
fig|6666666.563250.peg.1992	CDS	1	2359822	2360364	1	+	543	Terminal oxidase biogenesis protein CtaM, putative heme A, heme O chaperone	- none -
fig|6666666.563250.peg.1993	CDS	1	2360371	2360604	1	+	234	Hypothetical protein DUF334	- none -
fig|6666666.563250.peg.1994	CDS	1	2360841	2361542	3	+	702	ABC transporter, ATP-binding protein	- none -
fig|6666666.563250.peg.1995	CDS	1	2361535	2362782	1	+	1248	ABC transporter, permease protein	- none -
fig|6666666.563250.peg.1996	CDS	1	2362784	2364049	2	+	1266	ABC transporter, permease protein	- none -
fig|6666666.563250.peg.1997	CDS	1	2364087	2365199	3	+	1113	ABC transporter, RND-adapter-like protein	- none -
fig|6666666.563250.peg.1998	CDS	1	2365253	2366701	2	+	1449	Efflux transport system, outer membrane factor (OMF) lipoprotein	- none -
[truncated: 2,816 more rows]
